# Supplementary material for: Diastereoselective construction of carbo-bridged polyheterocycles by a three-component tandem annulation reaction
Source: Royal Society of Chemistry journal article supplement (doi:10.1039/d3ob01013a), 2023-01-01

# Supporting Information

## Diastereoselective Construction of Carbo-Bridged Polyheterocycles by a Three-component Tandem Annulation Reaction

Maorui Wang, and Min Zhang\*

School of Chemistry and Chemical Engineering and State Key Laboratory of Pulp and Paper Engineering, South China University of Technology, Guangzhou 510641, People's Republic of China.

### Corresponding Authors

\*Email: minzhang@scut.edu.cn

### Table of Contents

|                                                              |         |
|--------------------------------------------------------------|---------|
| General information                                          | S2      |
| Substrates Preparation                                       | S3-S7   |
| Control experiments                                          | S7-S8   |
| Typical procedure for the synthesis of <b>C</b> <sub>1</sub> | S8-S9   |
| Analytical data of the obtained compounds                    | S9-S26  |
| Crystal data of <b>C</b> <sub>11</sub>                       | S27-S32 |
| NMR spectra of obtained compounds                            | S33-S80 |

## General information

All the obtained products were characterized by melting points (m.p.),  $^1\text{H}$  NMR, and  $^{13}\text{C}$  NMR. Melting points were measured on an Electrothermal SGW-X4 microscopy digital melting point apparatus and are uncorrected.  $^1\text{H}$ -NMR,  $^{13}\text{C}$ -NMR and NOESY spectra were obtained on Bruker-400 or Bruker-500 and referenced to 7.26 ppm for chloroform solvent or 2.54 ppm for dimethyl sulfoxide solvent with TMS as internal standard (0 ppm). Chemical shifts were reported in parts per million (ppm,  $\delta$ ) downfield from tetramethylsilane. Proton coupling patterns are described as singlet (s), doublet (d), triplet (t), multiplet (m); TLC was performed using commercially prepared 600 mesh silica gel plates (GF254), and visualization was effected at 254 nm. Analytical HPLC was run with an Agilent 1260 Infinity, equipped with a Daicel CHIRALPAK IA (4.6 mm  $\times$  250 mm) and an Agilent LC1260 II DAD-G7115A detector. Unless otherwise stated, all the reagents were purchased from commercial sources, used without further purification.

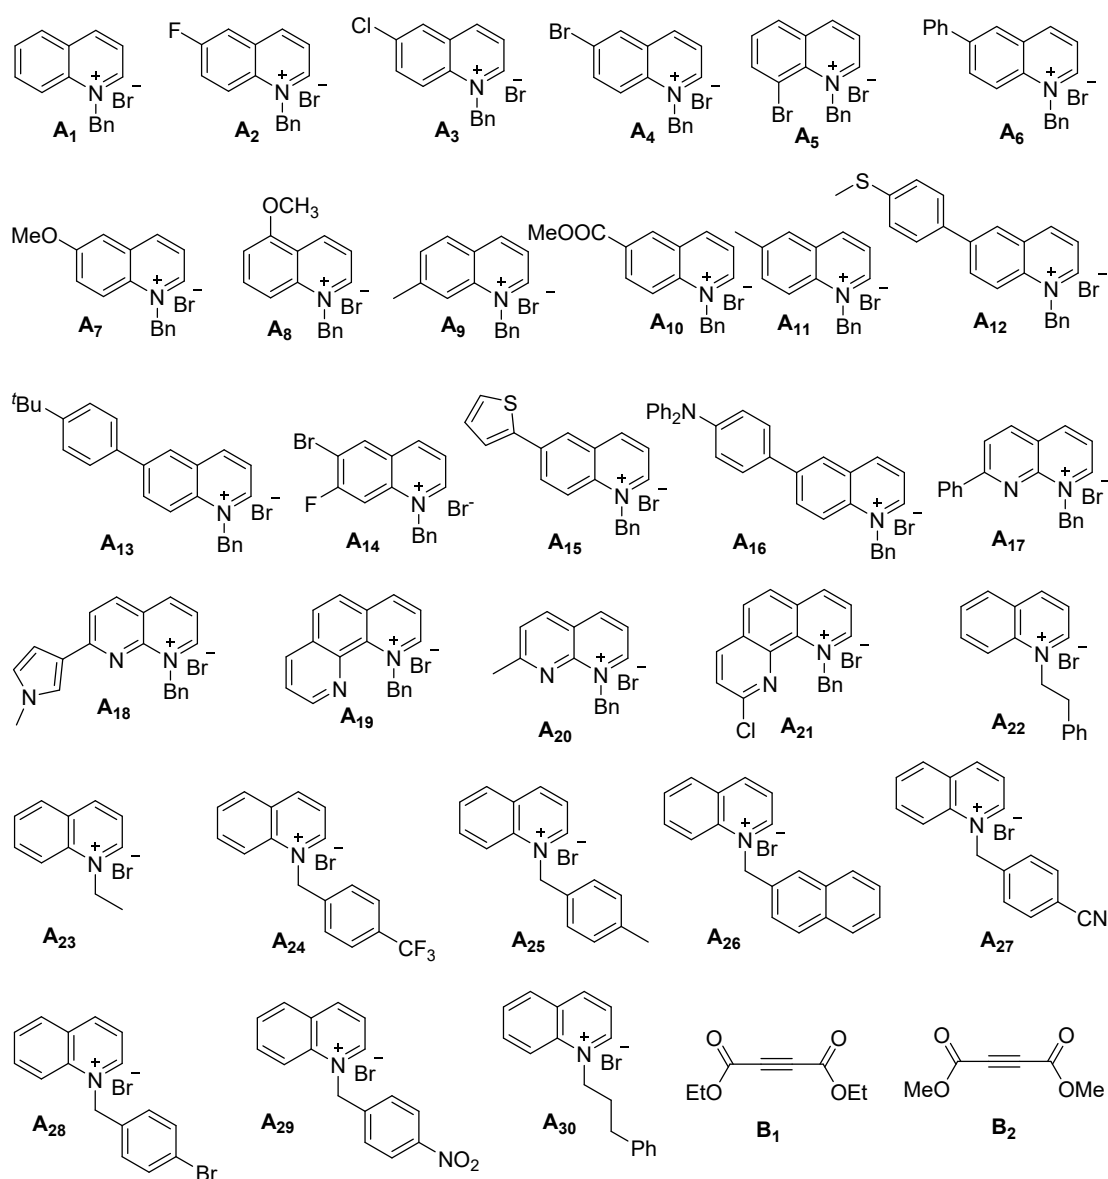

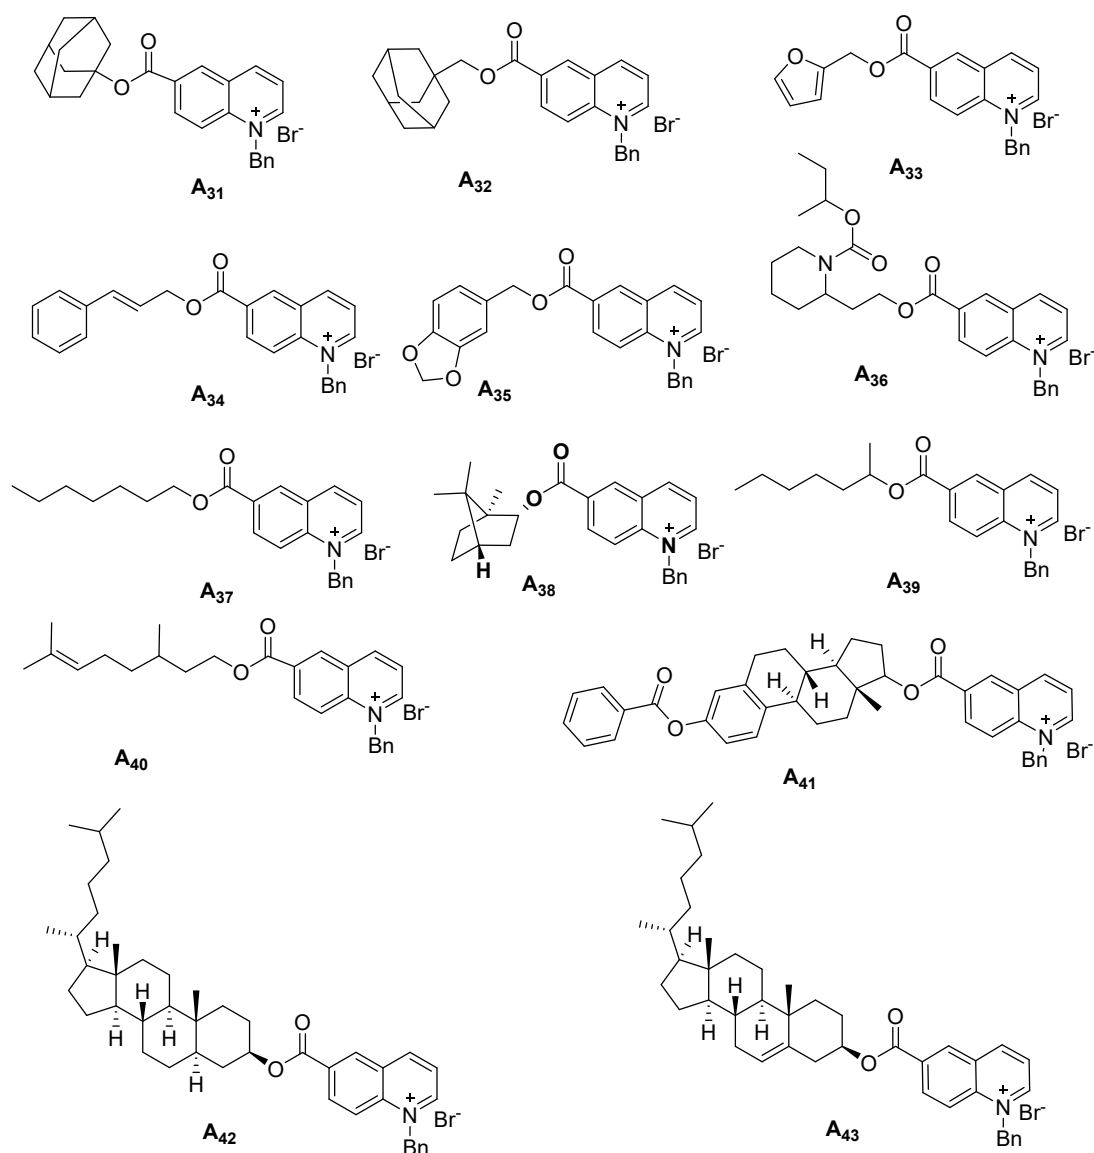

**Scheme S1.** Substrates employed for the reaction

### Substrate preparation

**Synthesis of N-heteroarenium Salts Method:** N-heteroarenes (3 mmol), halogenated compound (3 mmol) and toluene (3 mL) were introduced in a flask (25 mL), and the resulting mixture was stirred at 110 °C for 24 hours. After that, the solvent was removed. The reaction mixture was washed with small amount of diethyl ether and finally dried under vacuum to afford quinolinium salts **A**<sub>1</sub>-**A**<sub>30</sub>.

To a suspension of quinoline-6-carboxylic acid (5.0 mmol) in CH<sub>2</sub>Cl<sub>2</sub> was added DMAP (4-(dimethylamino)-pyridine, 10.0 mmol) in one portion at room temperature. The reaction mixture was stirred for 10 min at room temperature. Then, N-(3-(Dimethylamino)propyl)-N'-ethylcarbodiimide hydrochloride (EDC, 5.0 mmol) was added at 0 °C, the resultant suspension was stirred for 10 min at 0 °C, and a solution of alcohol (4.0 mmol) in CH<sub>2</sub>Cl<sub>2</sub> was added at 0 °C. The cooling bath was removed, and the reaction mixture was stirred at room temperature for 16 h. The solution was diluted by addition of saturated aqueous NH<sub>4</sub>Cl solution and CH<sub>2</sub>Cl<sub>2</sub> at room temperature. The organic phase was dried with anhydrous sodium sulfate, and then concentrated

by removing the solvent under vacuum. Finally, the residue was purified by preparative TLC on silica to give 6-ester substituted quinolines.

Then, 6-ester substituted quinolines (3 mmol), benzyl bromide (3 mmol) and toluene (3 mL) were introduced in a flask (25 mL), and the resulting mixture was stirred at 110 °C for 24 hours. After removing the solvent, the reaction mixture was washed with small amount of diethyl ether and finally dried under vacuum to get reactants **A**<sub>31</sub>-**A**<sub>43</sub>.

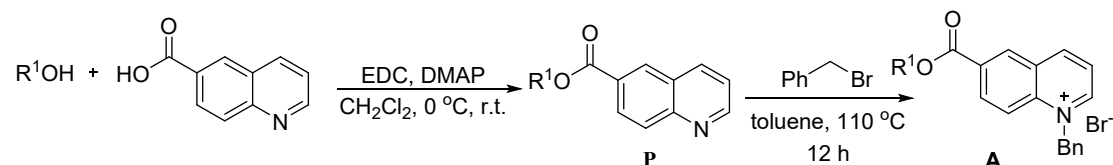

(1) 1-benzyl-6-(4-(tert-butyl)phenyl)quinolin-1-ium bromide (**A**<sub>13</sub>)

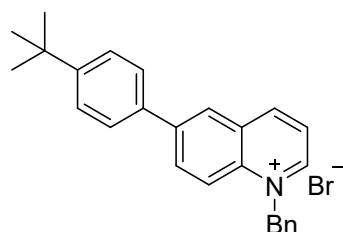

Yellow solid, <sup>1</sup>H NMR (500 MHz, DMSO-*d*<sub>6</sub>) δ 9.82 (d, *J* = 16.1 Hz, 1H), 9.42 (d, *J* = 9.0 Hz, 1H), 8.85 (s, 1H), 8.64 – 8.50 (m, 2H), 8.33 (t, *J* = 7.0 Hz, 1H), 7.86 (d, *J* = 8.0 Hz, 2H), 7.60 (d, *J* = 7.9 Hz, 2H), 7.56 – 7.32 (m, 1H), 7.31 – 7.10 (m, 2H), 6.47 (d, *J* = 8.2 Hz, 2H), 1.34 (s, 9H). <sup>13</sup>C NMR (126 MHz, DMSO) δ 150.4, 148.5, 141.4, 134.9, 134.5, 131.0, 129.6, 129.4, 129.3, 128.7, 127.8, 127.6, 126.7, 125.8, 123.3, 120.4, 60.4, 34.9, 31.5. HRMS (ESI): Calcd. for C<sub>26</sub>H<sub>26</sub>N [M-Br]<sup>+</sup>: 352.2060; found: 352.2065.

(2) 1-benzyl-6-bromo-7-fluoroquinolin-1-ium bromide (**A**<sub>14</sub>)

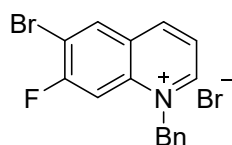

Light yellow solid, <sup>1</sup>H NMR (500 MHz, DMSO-*d*<sub>6</sub>) δ 9.92 (dd, *J* = 6.0, 1.4 Hz, 1H), 9.41 (d, *J* = 8.3 Hz, 1H), 9.16 (d, *J* = 7.5 Hz, 1H), 8.75 (d, *J* = 10.4 Hz, 1H), 8.37 (dd, *J* = 8.4, 5.8 Hz, 1H), 7.55 – 7.32 (m, 5H), 6.45 (s, 2H). <sup>13</sup>C NMR (126 MHz, DMSO) δ 161.5 (d, *J* = 256.3 Hz), 151.9, 147.6, 138.8 (d, *J* = 12.1 Hz), 136.5 (d, *J* = 2.6 Hz), 133.8, 129.6, 129.4, 128.7, 128.2, 123.6 (d, *J* = 2.2 Hz), 113.7 (d, *J* = 24.1 Hz), 107.1 (d, *J* = 29.2 Hz), 60.4. HRMS (ESI): Calcd. for C<sub>16</sub>H<sub>12</sub>NFBr [M-Br]<sup>+</sup>: 316.0132; found: 316.0137.

(3) 1-benzyl-6-(thiophen-2-yl)quinolin-1-ium (**A**<sub>15</sub>)

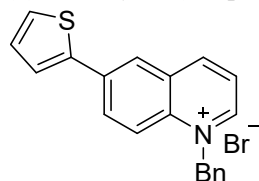

Light yellow solid, <sup>1</sup>H NMR (500 MHz, DMSO-*d*<sub>6</sub>) δ 9.78 (dd, *J* = 5.8, 1.4 Hz, 1H), 9.39 (d, *J* = 8.3 Hz, 1H), 8.76 (d, *J* = 2.1 Hz, 1H), 8.59 – 8.51 (m, 2H), 8.31 (dd, *J* = 8.4, 5.7 Hz, 1H), 7.89 (dd,

$J = 3.7, 1.2$  Hz, 1H), 7.79 (dd,  $J = 5.0, 1.2$  Hz, 1H), 7.47 – 7.37 (m, 5H), 7.26 (dd,  $J = 5.1, 3.6$  Hz, 1H), 6.46 (s, 2H).  $^{13}\text{C}$  NMR (126 MHz, DMSO)  $\delta$  150.1, 148.2, 140.6, 137.2, 135.3, 134.4, 133.6, 131.2, 129.6, 129.6, 129.4, 129.3, 127.8, 127.6, 125.5, 123.6, 120.7, 60.4. HRMS (ESI): Calcd. for  $\text{C}_{20}\text{H}_{16}\text{NS}$   $[\text{M}-\text{Br}]^+$ : 302.0998; found: 302.1003.

(4) 1-benzyl-6-(4-(diphenylamino)phenyl)quinolin-1-ium bromide (**A<sub>16</sub>**)

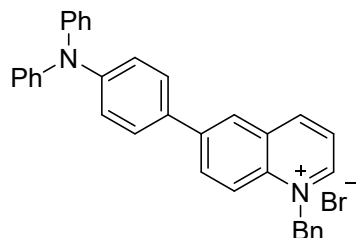

Light yellow solid,  $^1\text{H}$  NMR (500 MHz, DMSO- $d_6$ )  $\delta$  9.84 – 9.62 (m, 1H), 9.36 (t,  $J = 8.9$  Hz, 1H), 8.78 (q,  $J = 2.6$  Hz, 1H), 7.86 – 7.81 (m, 2H), 8.29 (dd,  $J = 8.4, 5.7$  Hz, 1H), 7.87 – 7.77 (m, 2H), 7.40 (dt,  $J = 31.2, 6.5$  Hz, 9H), 7.10 (dp,  $J = 14.6, 6.7, 6.2$  Hz, 8H), 6.57 – 6.30 (m, 2H).  $^{13}\text{C}$  NMR (126 MHz, DMSO)  $\delta$  150.0, 148.8, 148.3, 147.1, 141.0, 141.0, 137.1, 134.5, 134.5, 131.1, 130.2, 129.6, 129.3, 128.9, 127.8, 126.7, 125.3, 124.4, 123.3, 122.6, 120.4, 60.3. HRMS (ESI): Calcd. for  $\text{C}_{34}\text{H}_{27}\text{N}_2$   $[\text{M}-\text{Br}]^+$ : 463.2169; found: 463.2174.

(5) 6-((adamantan-1-ylmethoxy)carbonyl)-1-benzylquinolin-1-ium bromide (**A<sub>32</sub>**)

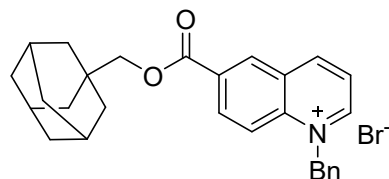

Light yellow solid,  $^1\text{H}$  NMR (500 MHz, DMSO- $d_6$ )  $\delta$  10.01 (s, 1H), 9.67 (d,  $J = 8.4$  Hz, 1H), 9.16 (s, 1H), 8.63 (dd,  $J = 61.0, 9.3$  Hz, 2H), 8.43 (t,  $J = 7.3$  Hz, 1H), 7.53 – 7.29 (m, 3H), 7.25 – 7.04 (m, 2H), 6.49 (s, 2H), 3.97 (s, 2H), 1.95 (s, 3H), 1.73 – 1.54 (m, 12H).  $^{13}\text{C}$  NMR (126 MHz, DMSO)  $\delta$  163.98, 152.30, 149.59, 139.34, 134.03, 133.62, 132.69, 130.40, 129.70, 129.03, 128.78, 127.41, 123.44, 120.44, 74.58, 60.11, 38.52, 36.28, 33.06, 27.37. HRMS (ESI): Calcd. for  $\text{C}_{28}\text{H}_{30}\text{NO}_2$   $[\text{M}-\text{Br}]^+$ : 412.2271; found: 412.2277.

(6) 1-benzyl-6-((furan-2-ylmethoxy)carbonyl)quinolin-1-ium bromide (**A<sub>33</sub>**)

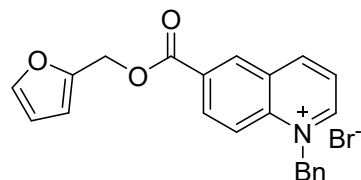

Brown solid,  $^1\text{H}$  NMR (500 MHz, DMSO- $d_6$ )  $\delta$  10.12 (d,  $J = 6.0$  Hz, 1H), 9.67 (d,  $J = 8.6$  Hz, 1H), 9.17 (s, 1H), 8.78 (d,  $J = 9.2$  Hz, 1H), 8.55 (dd,  $J = 9.3, 2.0$  Hz, 1H), 8.50 – 8.45 (m, 1H), 7.79 (s, 1H), 7.55 – 7.49 (m, 2H), 7.45 – 7.37 (m, 3H), 6.72 (d,  $J = 3.3$  Hz, 1H), 6.61 – 6.50 (m, 3H), 5.47 (s, 2H).  $^{13}\text{C}$  NMR (126 MHz, DMSO)  $\delta$  164.1, 152.8, 150.0, 149.2, 144.6, 139.9, 134.5, 134.1, 133.3, 130.4, 130.1, 129.5, 129.3, 128.1, 124.0, 121.0, 112.1, 111.4, 60.5, 59.7. HRMS (ESI): Calcd. for  $\text{C}_{22}\text{H}_{18}\text{NO}_3$   $[\text{M}-\text{Br}]^+$ : 344.1281; found: 344.1287.

(7) 1-benzyl-6-(((3,7-dimethyloct-6-en-1-yl)oxy)carbonyl)quinolin-1-ium bromide (**A<sub>34</sub>**)

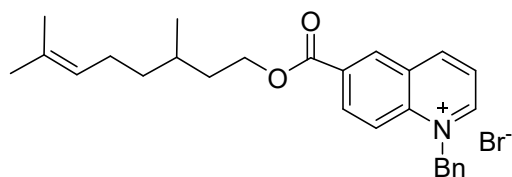

Light yellow solid, <sup>1</sup>H NMR (500 MHz, DMSO-*d*<sub>6</sub>) δ 9.95 (dd, *J* = 5.9, 1.5 Hz, 1H), 9.62 (d, *J* = 8.4 Hz, 1H), 9.15 (d, *J* = 2.0 Hz, 1H), 8.68 (d, *J* = 9.4 Hz, 1H), 8.56 (dd, *J* = 9.3, 2.1 Hz, 1H), 8.43 (dd, *J* = 8.4, 5.8 Hz, 1H), 7.62 – 7.21 (m, 5H), 6.47 (s, 2H), 5.12 – 5.03 (m, 1H), 4.51 – 4.35 (m, 2H), 3.79 (s, 1H), 2.05 – 1.97 (m, 2H), 1.87 – 1.76 (m, 1H), 1.68 – 1.51 (m, 7H), 1.43 – 1.32 (m, 1H), 1.25 – 1.15 (m, 1H), 0.95 (d, *J* = 6.4 Hz, 3H). <sup>13</sup>C NMR (126 MHz, DMSO) δ 164.5, 152.8, 150.0, 139.9, 134.5, 134.1, 133.2, 131.1, 131.0, 130.2, 129.6, 129.3, 128.0, 124.9, 124.0, 120.9, 64.6, 60.7, 36.9, 35.3, 29.4, 25.9, 25.3, 19.8, 18.0. HRMS (ESI): Calcd. for C<sub>27</sub>H<sub>32</sub>NO<sub>2</sub> [M–Br]<sup>+</sup>: 402.2428; found: 402.2433.

(8) 6-((benzo[d][1,3]dioxol-5-ylmethoxy)carbonyl)-1-benzylquinolin-1-ium bromide (**A<sub>35</sub>**)

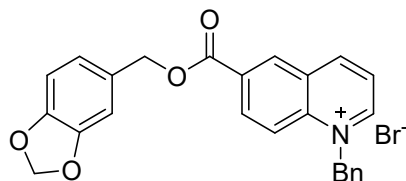

Light yellow solid, <sup>1</sup>H NMR (500 MHz, DMSO-*d*<sub>6</sub>) δ 9.99 (d, *J* = 5.8 Hz, 1H), 9.63 (d, *J* = 8.5 Hz, 1H), 9.17 (s, 1H), 8.70 (d, *J* = 9.3 Hz, 1H), 8.63 – 8.56 (m, 1H), 8.43 (dd, *J* = 8.4, 5.7 Hz, 1H), 7.52 – 7.32 (m, 5H), 7.13 (s, 1H), 6.99 (dd, *J* = 44.8, 7.9 Hz, 2H), 6.49 (s, 2H), 6.05 (s, 2H), 5.36 (s, 2H). <sup>13</sup>C NMR (126 MHz, DMSO) δ 164.4, 152.8, 150.0, 147.9, 147.9, 139.9, 134.7, 134.1, 133.3, 130.8, 130.2, 129.6, 129.6, 129.3, 128.0, 124.0, 122.9, 120.9, 109.5, 108.7, 101.7, 67.7, 60.6. HRMS (ESI): Calcd. for C<sub>25</sub>H<sub>20</sub>NO<sub>4</sub> [M–Br]<sup>+</sup>: 398.1387; found: 398.1392.

(9) 1-benzyl-6-((2-(1-(sec-butoxycarbonyl)piperidin-2-yl)ethoxy)carbonyl)quinolin-1-ium bromide (**A<sub>36</sub>**)

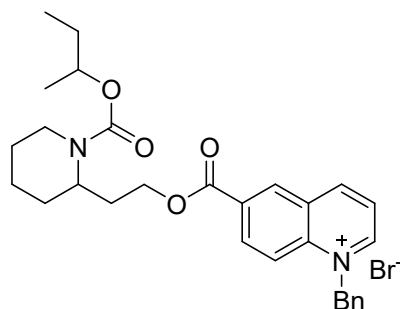

Pink solid, <sup>1</sup>H NMR (500 MHz, DMSO-*d*<sub>6</sub>) δ 9.98 (d, *J* = 5.8 Hz, 1H), 9.61 (d, *J* = 8.3 Hz, 1H), 9.27 – 9.07 (m, 1H), 8.70 (d, *J* = 9.3 Hz, 1H), 8.57 (dt, *J* = 9.3, 2.5 Hz, 1H), 8.44 (dd, *J* = 8.4, 5.8 Hz, 1H), 7.50 – 7.35 (m, 5H), 6.49 (s, 2H), 4.55 – 4.41 (m, 2H), 4.39 – 4.28 (m, 2H), 3.92 (d, *J* = 13.4 Hz, 1H), 2.90 (t, *J* = 13.2 Hz, 1H), 2.34 – 2.23 (m, 1H), 1.97 – 1.85 (m, 1H), 1.68 – 1.51 (m, 5H), 1.45 – 1.21 (m, 3H), 1.00 (d, *J* = 6.3 Hz, 3H), 0.70 (t, *J* = 7.4 Hz, 3H). <sup>13</sup>C NMR (126 MHz, DMSO) δ 164.4, 155.1, 155.0, 152.8, 149.9, 139.8, 134.5, 134.1, 133.2, 130.1, 129.6, 129.3, 128.0,

124.1, 120.8, 72.5, 72.4, 63.9, 60.6, 28.8, 28.5, 25.7, 19.9, 19.1, 9.9, 9.9. HRMS (ESI): Calcd. for  $C_{29}H_{35}N_2O_4$   $[M-Br]^+$ : 475.2591; found: 475.2597.

(10) 1-benzyl-6-((heptyloxy)carbonyl)quinolin-1-ium bromide (**A<sub>37</sub>**)

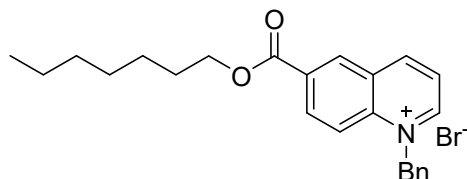

Light yellow solid,  $^1H$  NMR (500 MHz,  $DMSO-d_6$ )  $\delta$  10.17 (d,  $J = 5.6$  Hz, 1H), 9.71 (d,  $J = 8.4$  Hz, 1H), 9.19 (d,  $J = 1.9$  Hz, 1H), 8.81 (d,  $J = 9.3$  Hz, 1H), 8.57 (dd,  $J = 9.3, 2.0$  Hz, 1H), 8.49 (dd,  $J = 8.4, 5.8$  Hz, 1H), 7.56 – 7.51 (m, 2H), 7.46 – 7.35 (m, 3H), 6.60 (s, 2H), 4.39 (t,  $J = 6.5$  Hz, 2H), 1.81 – 1.73 (m, 2H), 1.47 – 1.39 (m, 2H), 1.38 – 1.22 (m, 6H), 0.89 – 0.82 (m, 3H).  $^{13}C$  NMR (126 MHz,  $DMSO$ )  $\delta$  163.91, 152.23, 149.39, 139.24, 133.88, 133.60, 132.58, 130.37, 129.58, 128.94, 128.71, 127.51, 123.47, 120.45, 65.65, 59.96, 31.05, 28.25, 28.02, 25.26, 21.93, 13.79. HRMS (ESI): Calcd. for  $C_{24}H_{28}NO_2$   $[M-Br]^+$ : 362.2115; found: 362.2120.

(11) 1-benzyl-6-((heptan-2-yloxy)carbonyl)quinolin-1-ium bromide (**A<sub>39</sub>**)

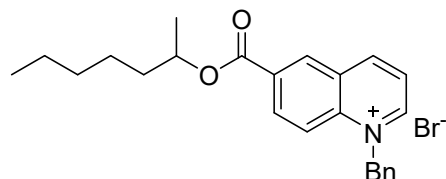

White solid,  $^1H$  NMR (500 MHz,  $DMSO-d_6$ )  $\delta$  9.96 (dd,  $J = 5.8, 1.4$  Hz, 1H), 9.63 (d,  $J = 8.3$  Hz, 1H), 9.15 (d,  $J = 1.9$  Hz, 1H), 8.69 (d,  $J = 9.3$  Hz, 1H), 8.57 (dd,  $J = 9.3, 1.9$  Hz, 1H), 8.43 (dd,  $J = 8.4, 5.8$  Hz, 1H), 7.52 – 7.29 (m, 5H), 6.47 (s, 2H), 5.26 – 5.11 (m, 1H), 4.39 (s, 1H), 1.89 – 1.57 (m, 2H), 1.47 – 1.16 (m, 8H), 0.99 – 0.53 (m, 3H).  $^{13}C$  NMR (126 MHz,  $DMSO$ )  $\delta$  164.1, 152.7, 150.0, 139.9, 134.6, 134.1, 133.1, 131.3, 130.2, 129.6, 129.3, 127.9, 124.0, 120.8, 73.3, 60.6, 35.7, 31.5, 24.9, 22.4, 20.2, 14.3. HRMS (ESI): Calcd. for  $C_{24}H_{28}NO_2$   $[M-Br]^+$ : 362.2115; found: 362.2120.

## Control experiments

### Synthesis of diethyl-2-hydrazineylidenesuccinate (**int-2**)

To a solution of 2-butynedioic acid diethyl ester **B<sub>1</sub>** (3.0 mmol) in 6 mL of MeCN was slowly added  $N_2H_4 \cdot H_2O$  (3 mmol) at room temperature. The reaction was stirred at room temperature, and concentrated under reduced pressure. The residue was purified by flash chromatography on silica gel to afford **int-2**.  $^1H$  NMR (500 MHz, Chloroform-*d*)  $\delta$  6.68 (s, 2H), 4.25 (q,  $J = 7.2$  Hz, 2H), 4.11 (q,  $J = 7.2, 6.8$  Hz, 2H), 3.56 (s, 2H), 1.29 (td,  $J = 7.1, 1.8$  Hz, 3H), 1.21 (td,  $J = 7.1, 1.7$  Hz, 3H).  $^{13}C$  NMR (126 MHz,  $CDCl_3$ )  $\delta$  168.7, 164.3, 131.6, 61.5, 61.4, 31.2, 14.1, 13.9.

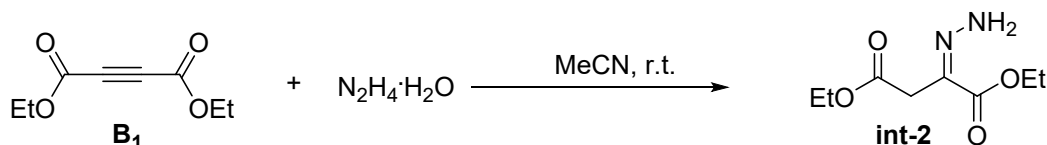

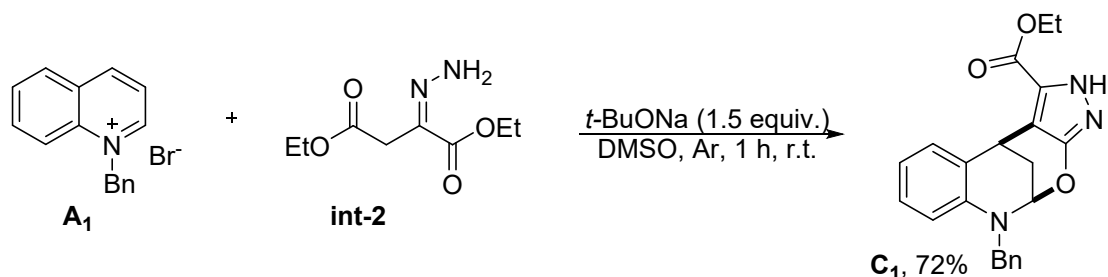

### Synthesis of ethyl 5-oxo-2,5-dihydro-1H-pyrazole-3-carboxylate (int-3)

To a solution of 2-butynedioic acid diethyl ester **B**<sub>1</sub> (3.0 mmol) in 6 mL of MeOH was slowly added N<sub>2</sub>H<sub>4</sub>·H<sub>2</sub>O (3 mmol) at 0 °C. The reaction was stirred at 0 °C for 12 h. After cooling down to room temperature and concentrated under reduced pressure. The residue was purified by flash chromatography on silica gel to afford **int-3**. <sup>1</sup>H NMR (500 MHz, Chloroform-*d*) δ 6.20 (s, 1H), 4.43 (q, *J* = 7.2 Hz, 2H), 1.41 (t, *J* = 7.2 Hz, 3H). <sup>13</sup>C NMR (126 MHz, CDCl<sub>3</sub>) δ 161.5, 161.4, 134.3, 92.9, 62.3, 14.1.

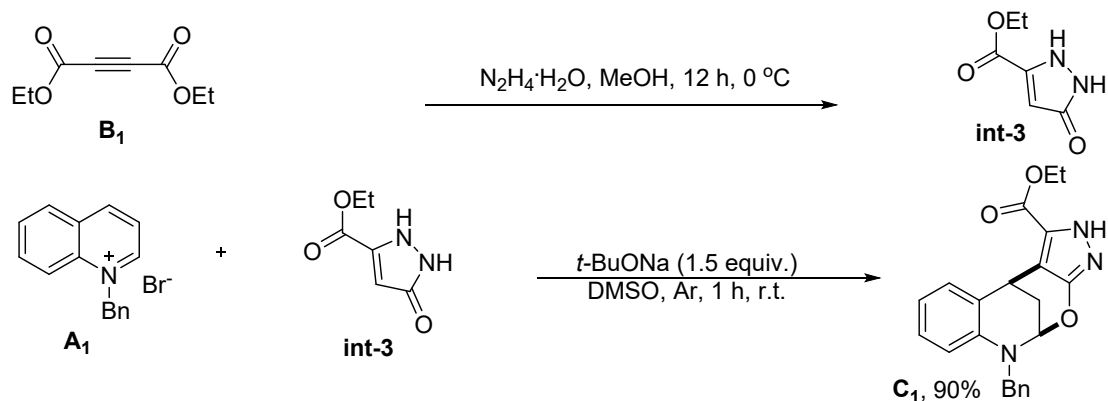

### Typical procedure for the synthesis of C<sub>1</sub>

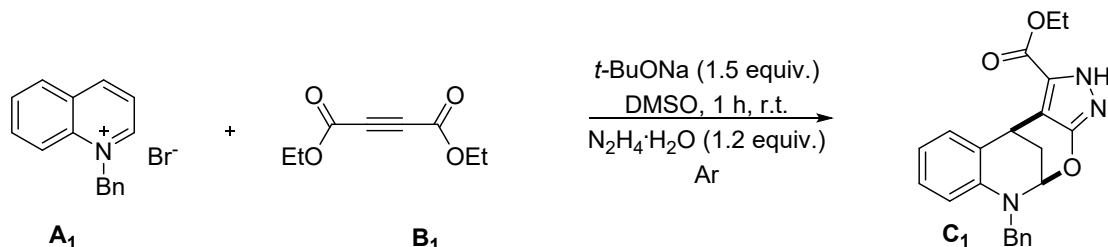

Under argon atmosphere, 2-butynedioic acid diethyl ester **B**<sub>1</sub> (0.17 mmol), DMSO (1 mL) were introduced in a Schlenk flask **I**, 0.2 mmol of N<sub>2</sub>H<sub>4</sub>·H<sub>2</sub>O dissolved in 1.5 ml of DMSO was added dropwise at room temperature. Then, *t*-BuONa (0.26 mmol) was added in a Schlenk flask **I**, and it was stirred at room temperature for 5 min. Next, 1-benzylquinolin-1-ium bromide **A**<sub>1</sub> (0.2 mmol) was added in the mixture at room temperature. After stirring for 1 h, the reaction was quenched with brine (10 mL) and extracted with EtOAc (3 × 5 mL), the combined organic layers were dried over anhydrous Na<sub>2</sub>SO<sub>4</sub>, filtered and concentrated in vacuo. Finally, the residue was purified by preparative TLC on silica to give **C**<sub>1</sub>.



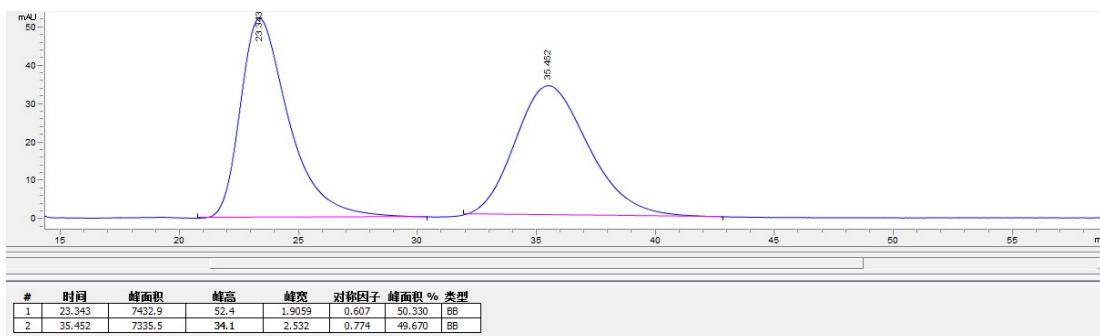

For **C<sub>1</sub>**, conditions: CHIRALCEL OJ (4.6 mm × 250 mm), hexane : IPA = 80 : 20, Flow: 1 mL/min, UV: 250 nm.

### Analytic data of the obtained compounds

- (1) Ethyl-6-benzyl-2,5,6,11-tetrahydro-5,11-methanobenzo[*d*]pyrazolo[4,3-*g*][1,3]oxazocine-1-carboxylate (**C<sub>1</sub>**)

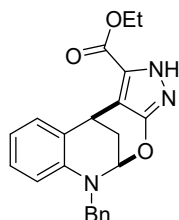

Red solid; M.p. 107-109 °C, (54.9 mg, 86% yield); <sup>1</sup>H NMR (400 MHz, Chloroform-*d*) δ 10.76 (s, 1H), 7.36 (d, *J* = 7.3 Hz, 1H), 7.27 (t, *J* = 7.4 Hz, 2H), 7.24 – 7.15 (m, 3H), 6.96 (t, *J* = 7.6 Hz, 1H), 6.68 (t, *J* = 7.4 Hz, 1H), 6.53 (d, *J* = 8.2 Hz, 1H), 5.64 (q, *J* = 2.1 Hz, 1H), 4.90 (d, *J* = 17.6 Hz, 1H), 4.64 (d, *J* = 17.6 Hz, 1H), 4.49 – 4.31 (m, 3H), 2.32 (dt, *J* = 13.1, 3.0 Hz, 1H), 2.11 (dt, *J* = 13.1, 2.7 Hz, 1H), 1.43 (t, *J* = 7.1 Hz, 3H). <sup>13</sup>C NMR (101 MHz, CDCl<sub>3</sub>) δ 159.5, 158.5, 141.3, 137.7, 128.9, 128.6, 127.6, 126.9, 126.9, 126.6, 126.1, 117.7, 111.2, 108.1, 84.3, 61.1, 51.8, 27.8, 27.1, 14.3. HRMS (ESI): Calcd. for C<sub>22</sub>H<sub>22</sub>N<sub>3</sub>O<sub>3</sub> [M+H]<sup>+</sup>: 376.1656; found: 376.1647.

- (2) Methyl-6-benzyl-2,5,6,11-tetrahydro-5,11-methanobenzo[*d*]pyrazolo[4,3-*g*][1,3]oxazocine-1-carboxylate (**C<sub>2</sub>**)

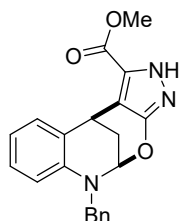

Red solid; M.p. 147-149 °C, (51.0 mg, 83% yield); <sup>1</sup>H NMR (400 MHz, Chloroform-*d*) δ 9.96 (s, 1H), 7.41 – 7.31 (m, 3H), 7.28 (d, *J* = 4.3 Hz, 1H), 7.28 – 7.21 (m, 2H), 7.08 – 6.99 (m, 1H), 6.75 (td, *J* = 7.4, 1.1 Hz, 1H), 6.59 (d, *J* = 8.2 Hz, 1H), 5.72 (q, *J* = 2.6 Hz, 1H), 4.97 (d, *J* = 17.6 Hz, 1H), 4.71 (d, *J* = 17.6 Hz, 1H), 4.48 (d, *J* = 3.2 Hz, 1H), 4.00 (s, 3H), 2.41 (dt, *J* = 13.1, 3.0 Hz, 1H), 2.19 (dt, *J* = 13.1, 2.6 Hz, 1H). <sup>13</sup>C NMR (101 MHz, CDCl<sub>3</sub>) δ 159.8, 158.7, 141.4, 137.7, 128.7, 127.7, 127.0, 126.6, 126.2, 117.9, 111.3, 108.5, 84.5, 51.9, 27.9, 27.2. HRMS (ESI): Calcd. for C<sub>21</sub>H<sub>20</sub>N<sub>3</sub>O<sub>3</sub> [M+H]<sup>+</sup>: 362.1499; found: 362.1490.

(3) Methyl-6-benzyl-2,5,6,11-tetrahydro-5,11-methanobenzo[*d*]pyrazolo[4,3-*g*][1,3]oxazocine-1-carboxylate (C<sub>3</sub>)

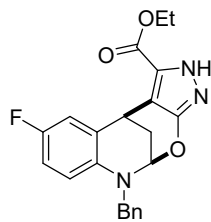

White solid; M.p. 116-118 °C, (60.1 mg, 90% yield); <sup>1</sup>H NMR (500 MHz, Chloroform-*d*) δ 10.61 (s, 1H), 7.30 (t, *J* = 7.5 Hz, 2H), 7.24 (d, *J* = 7.1 Hz, 1H), 7.18 (d, *J* = 7.0 Hz, 2H), 7.10 (dd, *J* = 8.5, 3.0 Hz, 1H), 6.67 (td, *J* = 8.7, 3.1 Hz, 1H), 6.42 (dd, *J* = 9.0, 4.5 Hz, 1H), 5.68 (q, *J* = 2.1 Hz, 1H), 4.92 (d, *J* = 17.6 Hz, 1H), 4.62 (d, *J* = 17.6 Hz, 1H), 4.54 – 4.36 (m, 3H), 2.37 (dt, *J* = 13.2, 3.0 Hz, 1H), 2.14 (dt, *J* = 13.2, 2.6 Hz, 1H), 1.48 (t, *J* = 7.1 Hz, 3H). <sup>13</sup>C NMR (101 MHz, CDCl<sub>3</sub>) δ 159.2, 157.9 (d, *J* = 237.5 Hz), 154.3, 137.6, 137.6, 129.0, 128.8, 127.8 (d, *J* = 6.8 Hz), 127.1, 126.1, 113.8 (d, *J* = 43.2 Hz), 113.8 (d, *J* = 1.5 Hz), 111.9 (d, *J* = 7.6 Hz), 107.8, 84.5, 61.4, 52.3, 28.0, 27.2, 14.5. <sup>19</sup>F NMR (471 MHz, Chloroform-*d*) δ -127.25. HRMS (ESI): Calcd. for C<sub>22</sub>H<sub>21</sub>N<sub>3</sub>O<sub>3</sub>F [M+H]<sup>+</sup>: 394.1561; found: 394.1562.

(4) Ethyl-6-benzyl-9-chloro-2,5,6,11-tetrahydro-5,11-methanobenzo[*d*]pyrazolo[4,3-*g*][1,3]oxazocine-1-carboxylate (C<sub>4</sub>)

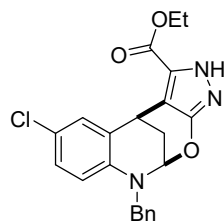

Red solid; M.p. 147-149 °C, (56.3 mg, 81% yield); <sup>1</sup>H NMR (500 MHz, Chloroform-*d*) δ 11.05 (s, 1H), 7.33 (d, *J* = 2.6 Hz, 1H), 7.28 (dd, *J* = 8.2, 6.8 Hz, 2H), 7.24 – 7.18 (m, 1H), 7.15 (d, *J* = 7.4 Hz, 2H), 6.89 (dd, *J* = 8.7, 2.6 Hz, 1H), 6.42 (d, *J* = 8.7 Hz, 1H), 5.63 (q, *J* = 2.1 Hz, 1H), 4.88 (d, *J* = 17.6 Hz, 1H), 4.60 (d, *J* = 17.6 Hz, 1H), 4.54 – 4.47 (m, 1H), 4.44 – 4.33 (m, 2H), 2.34 (dt, *J* = 13.1, 3.0 Hz, 1H), 2.09 (dt, *J* = 13.2, 2.6 Hz, 1H), 1.48 (t, *J* = 7.2 Hz, 3H). <sup>13</sup>C NMR (126 MHz, CDCl<sub>3</sub>) δ 159.4, 158.5, 139.9, 137.2, 129.0, 128.7, 128.0, 127.1, 127.0, 126.7, 126.0, 122.3, 112.3, 107.3, 84.2, 61.4, 52.1, 27.8, 27.0, 14.3. HRMS (ESI): Calcd. for C<sub>22</sub>H<sub>21</sub>N<sub>3</sub>O<sub>3</sub>Cl [M+H]<sup>+</sup>: 410.1266; found: 410.1260.

(5) Ethyl-6-benzyl-9-bromo-2,5,6,11-tetrahydro-5,11-methanobenzo[*d*]pyrazolo[4,3-*g*][1,3]oxazocine-1-carboxylate (C<sub>5</sub>)

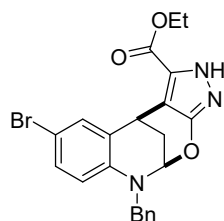

White solid; M.p. 148-150 °C, (61.6 mg, 80% yield); <sup>1</sup>H NMR (500 MHz, Chloroform-*d*) δ 10.30

(s, 1H), 7.47 (d,  $J = 2.4$  Hz, 1H), 7.31 (t,  $J = 7.4$  Hz, 2H), 7.28 – 7.22 (m, 1H), 7.17 (d,  $J = 7.5$  Hz, 2H), 7.06 (dd,  $J = 8.7, 2.4$  Hz, 1H), 6.40 (d,  $J = 8.7$  Hz, 1H), 5.66 (q,  $J = 2.2$  Hz, 1H), 4.91 (d,  $J = 17.5$  Hz, 1H), 4.63 (d,  $J = 17.6$  Hz, 1H), 4.54 (dq,  $J = 10.9, 7.2$  Hz, 1H), 4.47 – 4.36 (m, 2H), 2.38 (dt,  $J = 13.2, 3.0$  Hz, 1H), 2.12 (dt,  $J = 13.2, 2.7$  Hz, 1H), 1.52 (t,  $J = 7.2$  Hz, 3H).  $^{13}\text{C}$  NMR (101 MHz,  $\text{CDCl}_3$ )  $\delta$  159.4, 158.7, 140.5, 137.2, 130.2, 129.6, 129.1, 128.8, 128.5, 127.2, 126.1, 113.0, 109.7, 107.4, 84.2, 61.5, 52.1, 27.8, 27.1, 14.5. HRMS (ESI): Calcd. for  $\text{C}_{22}\text{H}_{21}\text{N}_3\text{O}_3\text{Br}$   $[\text{M}+\text{H}]^+$ : 454.0761; found: 454.0750.

(6) Ethyl-6-benzyl-7-bromo-2,5,6,11-tetrahydro-5,11-methanobenzo[*d*]pyrazolo[4,3-*g*][1,3]oxazocine-1-carboxylate (**C<sub>6</sub>**)

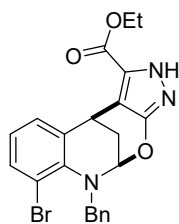

White solid; M.p. 149-151°C, (33.1 mg, 43% yield);  $^1\text{H}$  NMR (500 MHz, Chloroform-*d*)  $\delta$  9.92 (s, 1H), 7.47 (d,  $J = 2.4$  Hz, 1H), 7.43 (d,  $J = 8.2$  Hz, 2H), 7.26 (s, 1H), 7.11 – 7.01 (m, 3H), 6.35 (d,  $J = 8.7$  Hz, 1H), 5.64 (q,  $J = 1.9$  Hz, 1H), 4.86 (d,  $J = 17.6$  Hz, 1H), 4.63 – 4.49 (m, 2H), 4.48 – 4.35 (m, 2H), 2.39 (dt,  $J = 13.2, 2.9$  Hz, 1H), 2.11 (dt,  $J = 13.3, 2.6$  Hz, 1H), 1.52 (t,  $J = 7.2$  Hz, 3H).  $^{13}\text{C}$  NMR (126 MHz,  $\text{CDCl}_3$ )  $\delta$  159.2, 158.7, 140.2, 136.3, 131.9, 131.8, 130.3, 129.7, 128.6, 128.0, 121.0, 112.9, 110.0, 107.4, 84.4, 61.6, 52.0, 27.7, 27.1, 14.5. HRMS (ESI): Calcd. for  $\text{C}_{22}\text{H}_{21}\text{N}_3\text{O}_3\text{Br}$   $[\text{M}+\text{H}]^+$ : 454.0761; found: 454.0753.

(7) Ethyl-6-benzyl-9-phenyl-2,5,6,11-tetrahydro-5,11-methanobenzo[*d*]pyrazolo[4,3-*g*][1,3]oxazocine-1-carboxylate (**C<sub>7</sub>**)

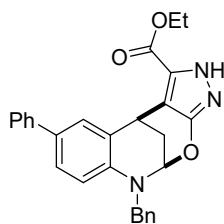

Red solid; M.p. 126-128 °C, (52.9 mg, 69% yield);  $^1\text{H}$  NMR (500 MHz, Chloroform-*d*)  $\delta$  10.75 (s, 1H), 7.64 (d,  $J = 2.2$  Hz, 1H), 7.49 (d,  $J = 7.7$  Hz, 2H), 7.35 (t,  $J = 7.6$  Hz, 2H), 7.32 – 7.27 (m, 2H), 7.25 – 7.19 (m, 5H), 6.60 (d,  $J = 8.5$  Hz, 1H), 5.67 (q,  $J = 2.1$  Hz, 1H), 4.93 (d,  $J = 17.5$  Hz, 1H), 4.68 (d,  $J = 17.6$  Hz, 1H), 4.50 (d,  $J = 3.1$  Hz, 1H), 4.42 – 4.33 (m, 2H), 2.37 (dt,  $J = 13.1, 3.0$  Hz, 1H), 2.16 (dt,  $J = 13.1, 2.6$  Hz, 1H), 1.38 (t,  $J = 7.2$  Hz, 3H).  $^{13}\text{C}$  NMR (126 MHz,  $\text{CDCl}_3$ )  $\delta$  159.4, 158.7, 140.9, 140.7, 137.6, 130.8, 128.9, 128.7, 128.5, 127.0, 126.2, 126.2, 126.2, 125.7, 111.6, 108.1, 84.3, 61.3, 52.0, 28.0, 27.2, 14.3. HRMS (ESI): Calcd. for  $\text{C}_{28}\text{H}_{26}\text{N}_3\text{O}_3$   $[\text{M}+\text{H}]^+$ : 452.1969; found: 452.1965.

(8) Ethyl-6-benzyl-9-methoxy-2,5,6,11-tetrahydro-5,11-methanobenzo[*d*]pyrazolo[4,3-*g*][1,3]oxazocine-1-carboxylate (**C<sub>8</sub>**)

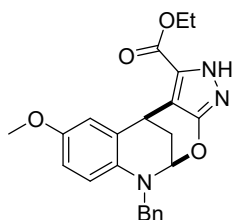

Red solid; M.p. 100-102 °C, (55.1 mg, 80% yield); <sup>1</sup>H NMR (500 MHz, Chloroform-*d*) δ 10.12 (s, 1H), 7.31 (t, *J* = 7.5 Hz, 2H), 7.28 – 7.17 (m, 3H), 7.00 (d, *J* = 2.9 Hz, 1H), 6.56 (dd, *J* = 8.9, 3.0 Hz, 1H), 6.45 (d, *J* = 8.8 Hz, 1H), 5.69 (q, *J* = 2.1 Hz, 1H), 4.92 (d, *J* = 17.5 Hz, 1H), 4.62 (d, *J* = 17.6 Hz, 1H), 4.49 – 4.37 (m, 3H), 3.72 (s, 3H), 2.37 (dt, *J* = 13.1, 3.0 Hz, 1H), 2.16 (dt, *J* = 13.2, 2.6 Hz, 1H), 1.48 (t, *J* = 7.1 Hz, 3H). <sup>13</sup>C NMR (126 MHz, CDCl<sub>3</sub>) δ 159.3, 159.2, 151.9, 138.1, 135.4, 128.9, 128.7, 127.7, 127.0, 126.2, 113.4, 112.3, 111.9, 108.3, 84.9, 61.3, 55.7, 52.3, 28.2, 27.4, 14.5. HRMS (ESI): Calcd. for C<sub>23</sub>H<sub>24</sub>N<sub>3</sub>O<sub>4</sub> [M+H]<sup>+</sup>: 406.1761; found: 406.1757.

(9) Ethyl-6-benzyl-10-methoxy-2,5,6,11-tetrahydro-5,11-methanobenzo[*d*]pyrazolo [4,3-*g*][1,3]oxazocine-1-carboxylate (C<sub>9</sub>)

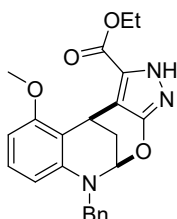

Red solid; M.p. 140-142 °C, (25.5 mg, 37% yield); <sup>1</sup>H NMR (400 MHz, Chloroform-*d*) δ 10.22 (s, 1H), 7.30 (t, *J* = 7.2 Hz, 2H), 7.26 – 7.17 (m, 3H), 6.93 (t, *J* = 8.3 Hz, 1H), 6.35 (d, *J* = 8.2 Hz, 1H), 6.24 (d, *J* = 8.3 Hz, 1H), 5.61 (q, *J* = 2.1 Hz, 1H), 5.01 (d, *J* = 3.2 Hz, 1H), 4.94 (d, *J* = 17.6 Hz, 1H), 4.69 (d, *J* = 17.6 Hz, 1H), 4.53 – 4.47 (m, 1H), 4.34 – 4.27 (m, 1H), 3.86 (s, 3H), 2.34 (dt, *J* = 13.1, 3.0 Hz, 1H), 2.04 (dt, *J* = 13.2, 2.7 Hz, 1H), 1.40 (t, *J* = 7.1 Hz, 3H). <sup>13</sup>C NMR (101 MHz, CDCl<sub>3</sub>) δ 159.6, 159.35, 155.6, 142.8, 138.0, 129.2, 128.7, 127.5, 126.9, 126.2, 114.3, 107.6, 104.9, 101.1, 83.7, 60.9, 55.5, 52.2, 27.5, 20.3, 14.4. HRMS (ESI): Calcd. for C<sub>23</sub>H<sub>24</sub>N<sub>3</sub>O<sub>4</sub> [M+H]<sup>+</sup>: 406.1761; found: 406.1760.

(10) Ethyl-6-benzyl-8-methyl-2,5,6,11-tetrahydro-5,11-methanobenzo[*d*]pyrazolo [4,3-*g*][1,3]oxazocine-1-carboxylate (C<sub>10</sub>)

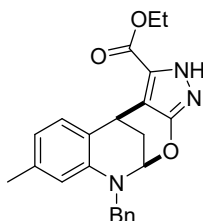

Red solid; M.p. 117-119 °C, (58.2 mg, 88% yield); <sup>1</sup>H NMR (400 MHz, Chloroform-*d*) δ 10.11 (s, 1H), 7.32 (t, *J* = 7.3 Hz, 2H), 7.28 – 7.19 (m, 4H), 6.54 (d, *J* = 7.5 Hz, 1H), 6.41 (s, 1H), 5.64 (q, *J* = 2.1 Hz, 1H), 4.91 (d, *J* = 17.6 Hz, 1H), 4.68 (d, *J* = 17.6 Hz, 1H), 4.48 – 4.36 (m, 3H), 2.35 (dt, *J* = 13.1, 3.0 Hz, 1H), 2.20 – 2.08 (m, 4H), 1.46 (t, *J* = 7.1 Hz, 3H). <sup>13</sup>C NMR (126 MHz, CDCl<sub>3</sub>) δ 159.3, 159.0, 141.5, 137.9, 137.7, 128.8, 128.6, 127.0, 126.9, 126.3, 123.9, 118.7, 112.0, 108.8,

84.2, 61.2, 51.7, 27.6, 27.5, 21.6, 14.5. HRMS (ESI): Calcd. for  $C_{23}H_{24}N_3O_3$   $[M+H]^+$ : 390.1812; found: 390.1809.

(11) 1-ethyl 9-methyl-6-benzyl-2,5,6,11-tetrahydro-5,11-methanobenzo[*d*]pyrazolo [4,3-*g*][1,3]oxazocine-1,9-dicarboxylate (**C<sub>11</sub>**)

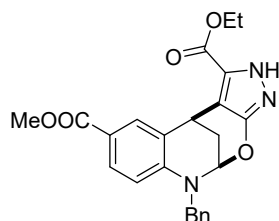

White solid; M.p. 157-159 °C, (65.5 mg, 89% yield);  $^1H$  NMR (500 MHz, Chloroform-*d*)  $\delta$  11.05 (s, 1H), 8.04 (d,  $J = 2.2$  Hz, 1H), 7.69 (dd,  $J = 8.6, 2.2$  Hz, 1H), 7.30 (t,  $J = 7.4$  Hz, 2H), 7.22 (d,  $J = 7.4$  Hz, 1H), 7.16 (d,  $J = 7.5$  Hz, 2H), 6.55 (d,  $J = 8.7$  Hz, 1H), 5.65 (q,  $J = 2.4$  Hz, 1H), 4.93 (d,  $J = 17.5$  Hz, 1H), 4.72 (d,  $J = 17.5$  Hz, 1H), 4.59 – 4.39 (m, 3H), 3.83 (s, 3H), 2.39 (dt,  $J = 13.2, 3.0$  Hz, 1H), 2.11 (dt,  $J = 13.3, 2.7$  Hz, 1H), 1.57 (t,  $J = 7.2$  Hz, 3H).  $^{13}C$  NMR (126 MHz,  $CDCl_3$ )  $\delta$  166.9, 159.6, 158.3, 145.5, 136.7, 129.9, 129.0, 128.8, 128.5, 127.2, 126.1, 126.1, 119.2, 110.7, 107.2, 83.7, 61.6, 52.0, 51.5, 27.8, 26.9, 14.1. HRMS (ESI): Calcd. for  $C_{24}H_{24}N_3O_5$   $[M+H]^+$ : 434.1710; found: 434.1710.

(12) Ethyl-6-benzyl-9-methyl-2,5,6,11-tetrahydro-5,11-methanobenzo[*d*]pyrazolo [4,3-*g*][1,3]oxazocine-1-carboxylate (**C<sub>12</sub>**)

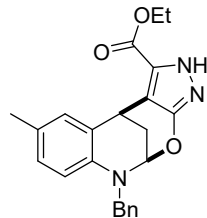

Red solid; M.p. 132-134 °C, (54.9 mg, 83% yield);  $^1H$  NMR (400 MHz, Chloroform-*d*)  $\delta$  10.35 (s, 1H), 7.30 (dd,  $J = 7.9, 6.5$  Hz, 2H), 7.20 (dd,  $J = 7.4, 1.9$  Hz, 4H), 6.80 (dd,  $J = 8.2, 2.2$  Hz, 1H), 6.45 (d,  $J = 8.2$  Hz, 1H), 5.66 (q,  $J = 2.1$  Hz, 1H), 4.91 (d,  $J = 17.6$  Hz, 1H), 4.64 (d,  $J = 17.6$  Hz, 1H), 4.54 – 4.38 (m, 3H), 2.35 (dt,  $J = 13.1, 3.0$  Hz, 1H), 2.22 (s, 3H), 2.13 (dt,  $J = 13.1, 2.6$  Hz, 1H), 1.48 (t,  $J = 7.1$  Hz, 3H).  $^{13}C$  NMR (101 MHz,  $CDCl_3$ )  $\delta$  159.5, 159.0, 139.1, 138.0, 128.9, 128.7, 128.1, 127.7, 127.0, 126.9, 126.5, 126.2, 111.2, 108.3, 84.6, 61.2, 52.0, 27.9, 27.4, 20.2, 14.5. HRMS (ESI): Calcd. for  $C_{23}H_{24}N_3O_3$   $[M+H]^+$ : 390.1812; found: 390.1808.

(13) Ethyl-6-benzyl-9-(4-(methylthio)phenyl)-2,5,6,11-tetrahydro-5,11-methanobenzo [d]pyrazolo[4,3-*g*][1,3]oxazocine-1-carboxylate (**C<sub>13</sub>**)

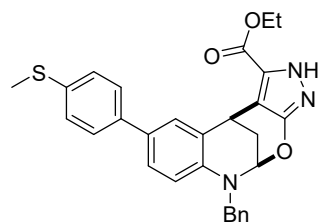

Red solid; M.p. 149-151 °C, (53.3 mg, 63% yield); <sup>1</sup>H NMR (400 MHz, Chloroform-*d*) δ 10.54 (s, 1H), 7.64 – 7.58 (m, 1H), 7.42 (d, *J* = 8.1 Hz, 2H), 7.33 – 7.19 (m, 8H), 6.59 (d, *J* = 8.5 Hz, 1H), 5.68 (s, 1H), 4.93 (d, *J* = 17.6 Hz, 1H), 4.68 (d, *J* = 17.6 Hz, 1H), 4.50 (s, 1H), 4.39 (q, *J* = 7.2 Hz, 2H), 2.47 (s, 3H), 2.42 – 2.32 (m, 1H), 2.17 (d, *J* = 13.2 Hz, 1H), 1.40 (t, *J* = 7.0 Hz, 3H). <sup>13</sup>C NMR (126 MHz, CDCl<sub>3</sub>) δ 159.3, 158.8, 140.9, 137.8, 137.6, 136.1, 130.2, 128.9, 128.8, 128.4, 127.1, 127.0, 126.6, 126.2, 126.0, 125.4, 111.7, 108.2, 84.4, 61.3, 52.1, 28.0, 27.3, 16.0, 14.4. HRMS (ESI): Calcd. for C<sub>29</sub>H<sub>28</sub>N<sub>3</sub>O<sub>3</sub>S [M+H]<sup>+</sup>: 498.1846; found: 498.1840.

(14) Ethyl-6-benzyl-9-(4-(tert-butyl)phenyl)-2,5,6,11-tetrahydro-5,11-methanobenzo[d]pyrazolo[4,3-*g*][1,3]oxazocine-1-carboxylate (C<sub>14</sub>)

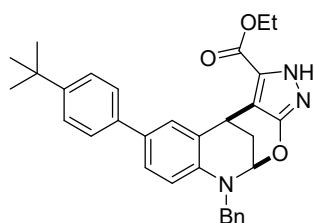

Red solid; M.p. 138-140 °C, (70.7 mg, 82% yield); <sup>1</sup>H NMR (500 MHz, Chloroform-*d*) δ 10.73 (s, 1H), 7.63 (s, 1H), 7.49 – 7.22 (m, 10H), 6.59 (d, *J* = 8.4 Hz, 1H), 5.67 (s, 1H), 4.93 (d, *J* = 17.6 Hz, 1H), 4.67 (d, *J* = 17.5 Hz, 1H), 4.53 – 4.33 (m, 3H), 2.36 (d, *J* = 13.2 Hz, 1H), 2.17 (d, *J* = 13.1 Hz, 1H), 1.41 (s, 3H), 1.33 (s, 9H). <sup>13</sup>C NMR (126 MHz, CDCl<sub>3</sub>) δ 159.4, 158.7, 149.0, 140.7, 137.9, 137.7, 130.8, 128.9, 128.7, 127.0, 127.0, 126.2, 126.1, 125.9, 125.6, 125.5, 111.6, 108.2, 84.4, 61.3, 52.0, 34.3, 31.3, 28.1, 27.3, 14.3. HRMS (ESI): Calcd. for C<sub>32</sub>H<sub>34</sub>N<sub>3</sub>O<sub>3</sub> [M+H]<sup>+</sup>: 508.2595; found: 508.2592.

(15) Ethyl-6-benzyl-9-bromo-8-fluoro-2,5,6,11-tetrahydro-5,11-methanobenzo[d]pyrazolo[4,3-*g*][1,3]oxazocine-1-carboxylate (C<sub>15</sub>)

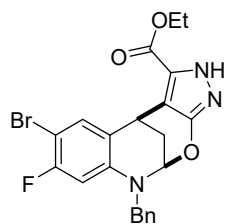

Red solid; M.p. 139-141 °C, (42.4 mg, 53% yield); <sup>1</sup>H NMR (500 MHz, Chloroform-*d*) δ 10.58 (s, 1H), 7.47 (d, *J* = 7.5 Hz, 1H), 7.32 (t, *J* = 7.3 Hz, 2H), 7.25 (t, *J* = 7.3 Hz, 1H), 7.16 (d, *J* = 7.5 Hz, 2H), 6.32 (d, *J* = 11.2 Hz, 1H), 5.67 – 5.61 (m, 1H), 4.90 (d, *J* = 17.6 Hz, 1H), 4.66 – 4.49 (m, 2H), 4.45 – 4.37 (m, 2H), 2.37 (dt, *J* = 13.4, 3.0 Hz, 1H), 2.10 (dt, *J* = 13.2, 2.8 Hz, 1H), 1.51 (t, *J* = 7.1 Hz, 3H). <sup>13</sup>C NMR (126 MHz, CDCl<sub>3</sub>) δ 159.4, 159.3, 158.0 (d, *J* = 131.0 Hz), 142.2 (d, *J* = 9.7 Hz), 136.5, 130.6 (d, *J* = 1.6 Hz), 128.9, 128.9 (d, *J* = 14.6 Hz), 127.4, 126.1, 123.9 (d, *J* = 2.9 Hz), 107.4, 100.1 (d, *J* = 27.6 Hz), 95.3 (d, *J* = 21.5 Hz), 83.7, 61.6, 52.4, 27.1, 27.1, 14.5. <sup>19</sup>F NMR (471 MHz, CDCl<sub>3</sub>) δ -108.78. HRMS (ESI): Calcd. for C<sub>22</sub>H<sub>20</sub>N<sub>3</sub>O<sub>3</sub>BrF [M+H]<sup>+</sup>: 472.0667; found: 472.0663.

(16) Ethyl-6-benzyl-9-(thiophen-2-yl)-2,5,6,11-tetrahydro-5,11-methanobenzo[d]pyrazolo[4,3-g][1,3]oxazocine-1-carboxylate (C<sub>16</sub>)

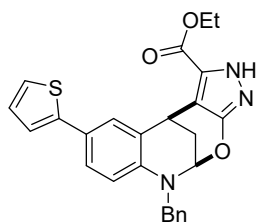

Red solid; M.p. 115-117 °C, (26.4 mg, 34% yield); <sup>1</sup>H NMR (500 MHz, Chloroform-*d*) δ 10.42 (s, 1H), 7.60 (d, *J* = 2.3 Hz, 1H), 7.32 (t, *J* = 7.4 Hz, 2H), 7.28 – 7.22 (m, 2H), 7.21 (d, *J* = 7.5 Hz, 2H), 7.16 (d, *J* = 5.1 Hz, 1H), 7.12 (d, *J* = 3.6 Hz, 1H), 7.01 (t, *J* = 4.3 Hz, 1H), 6.56 (d, *J* = 8.5 Hz, 1H), 5.70 (s, 1H), 4.95 (d, *J* = 17.6 Hz, 1H), 4.70 (d, *J* = 17.6 Hz, 1H), 4.47 (dq, *J* = 14.9, 7.4 Hz, 3H), 2.41 (dt, *J* = 13.1, 3.0 Hz, 1H), 2.18 (dt, *J* = 13.1, 2.6 Hz, 1H), 1.50 (t, *J* = 7.2 Hz, 3H). <sup>13</sup>C NMR (126 MHz, CDCl<sub>3</sub>) δ 159.5, 158.8, 144.6, 141.0, 137.5, 129.0, 128.8, 127.8, 127.1, 127.0, 126.2, 125.5, 124.9, 124.6, 123.2, 121.3, 111.7, 107.9, 84.4, 61.5, 52.1, 28.0, 27.3, 14.5. HRMS (ESI): Calcd. for C<sub>26</sub>H<sub>24</sub>N<sub>3</sub>O<sub>3</sub>S [M+H]<sup>+</sup>: 458.1533; found: 458.1527.

(17) Ethyl-6-benzyl-9-(4-(diphenylamino)phenyl)-2,5,6,11-tetrahydro-5,11-methanobenzo[d]pyrazolo[4,3-g][1,3]oxazocine-1-carboxylate (C<sub>17</sub>)

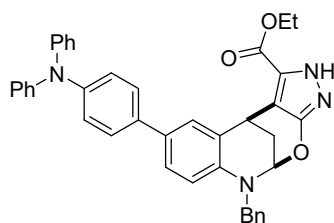

Red solid; M.p. 156-158 °C, (55.7 mg, 53% yield); <sup>1</sup>H NMR (400 MHz, Chloroform-*d*) δ 10.46 (s, 1H), 7.61 (s, 1H), 7.38 (d, *J* = 8.1 Hz, 2H), 7.33 – 7.16 (m, 10H), 7.09 (t, *J* = 7.5 Hz, 6H), 6.99 (t, *J* = 7.5 Hz, 2H), 6.59 (d, *J* = 8.5 Hz, 1H), 5.68 (s, 1H), 4.94 (d, *J* = 17.6 Hz, 1H), 4.69 (d, *J* = 17.5 Hz, 1H), 4.50 (s, 1H), 4.46 – 4.28 (m, 2H), 2.38 (d, *J* = 13.1 Hz, 1H), 2.18 (d, *J* = 13.1 Hz, 1H), 1.40 (t, *J* = 7.2 Hz, 3H). <sup>13</sup>C NMR (101 MHz, CDCl<sub>3</sub>) δ 159.4, 158.8, 147.7, 146.1, 140.5, 137.7, 135.1, 130.4, 129.1, 128.9, 128.7, 127.0, 127.0, 126.9, 126.2, 125.8, 125.4, 124.2, 124.1, 122.6, 111.7, 108.3, 84.4, 61.3, 52.0, 28.0, 27.3, 14.4. HRMS (ESI): Calcd. for C<sub>40</sub>H<sub>35</sub>N<sub>4</sub>O<sub>3</sub> [M+H]<sup>+</sup>: 619.2704; found: 619.2696.

(18) Ethyl-6-benzyl-8-phenyl-2,5,6,11-tetrahydro-5,11-methanopyrazolo[4,3-g]pyrido[2,3-*d*][1,3]oxazocine-1-carboxylate (C<sub>18</sub>)

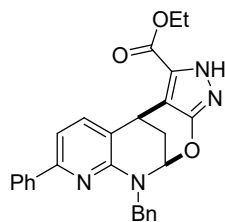

Red solid; M.p. 117-119 °C, (39.2 mg, 51% yield); <sup>1</sup>H NMR (400 MHz, Chloroform-*d*) δ 10.34 (s, 1H), 7.97 – 7.83 (m, 2H), 7.59 (d, *J* = 7.6 Hz, 1H), 7.50 – 7.39 (m, 2H), 7.38 – 7.21 (m, 6H), 7.11

(d,  $J = 7.5$  Hz, 1H), 5.79 (d,  $J = 15.4$  Hz, 1H), 5.70 (q,  $J = 2.3$  Hz, 1H), 4.62 (d,  $J = 15.4$  Hz, 1H), 4.56 – 4.32 (m, 3H), 2.33 (dt,  $J = 13.2, 3.0$  Hz, 1H), 2.03 (dt,  $J = 13.2, 2.6$  Hz, 1H), 1.45 (t,  $J = 7.1$  Hz, 3H).  $^{13}\text{C}$  NMR (126 MHz,  $\text{CDCl}_3$ )  $\delta$  159.2, 158.7, 153.4, 152.5, 139.4, 139.0, 134.5, 128.9, 128.4, 128.3, 128.3, 128.0, 127.0, 126.5, 119.6, 110.3, 108.1, 82.8, 61.3, 48.7, 27.6, 26.8, 14.4. HRMS (ESI): Calcd. for  $\text{C}_{27}\text{H}_{25}\text{N}_4\text{O}_3$   $[\text{M}+\text{H}]^+$ : 453.1921; found: 453.1917.

(19) Ethyl-6-benzyl-8-(1-methyl-1H-pyrrol-3-yl)-2,5,6,11-tetrahydro-5,11-methanopyrazolo[4,3-*g*]pyrido[2,3-*d*][1,3]oxazocine-1-carboxylate (**C<sub>19</sub>**)

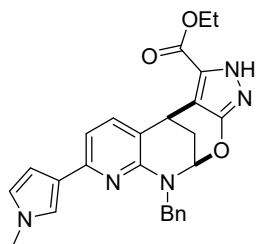

Red solid; M.p. 162-164 °C, (34.0 mg, 44% yield);  $^1\text{H}$  NMR (500 MHz, Chloroform-*d*)  $\delta$  10.07 (s, 1H), 7.75 – 7.44 (m, 1H), 7.37 – 7.17 (m, 5H), 6.93 (d,  $J = 7.7$  Hz, 1H), 6.51 (d,  $J = 35.2$  Hz, 2H), 6.07 (s, 1H), 5.80 – 5.43 (m, 2H), 4.66 (d,  $J = 16.1$  Hz, 1H), 4.52 – 4.32 (m, 3H), 3.59 (s, 3H), 2.35 (d,  $J = 12.9$  Hz, 1H), 2.10 (d,  $J = 13.2$  Hz, 1H), 1.60 – 1.37 (m, 3H).  $^{13}\text{C}$  NMR (101 MHz,  $\text{CDCl}_3$ )  $\delta$  159.2, 158.9, 151.9, 149.3, 145.5, 138.7, 134.5, 132.4, 128.9, 128.5, 127.1, 126.9, 125.7, 117.3, 111.6, 110.0, 108.4, 107.2, 83.2, 61.3, 48.9, 36.9, 27.6, 26.9, 14.5. HRMS (ESI): Calcd. for  $\text{C}_{26}\text{H}_{26}\text{N}_5\text{O}_3$   $[\text{M}+\text{H}]^+$ : 456.2030; found: 456.2018.

(20) Ethyl-11-benzyl-2,4,11,12-tetrahydro-4,12-methanopyrazolo[4',3':7,8][1,3]oxazocino[5,4-*h*]quinoline-3-carboxylate (**C<sub>20</sub>**)

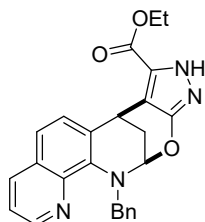

Yellowish brown solid; M.p. 114-116 °C, (26.8 mg, 37% yield);  $^1\text{H}$  NMR (500 MHz, Chloroform-*d*)  $\delta$  10.24 (s, 1H), 8.64 (dd,  $J = 4.1, 1.9$  Hz, 1H), 8.00 (dd,  $J = 8.3, 1.8$  Hz, 1H), 7.69 (d,  $J = 7.5$  Hz, 2H), 7.62 (d,  $J = 8.1$  Hz, 1H), 7.32 (t,  $J = 7.4$  Hz, 2H), 7.28 – 7.19 (m, 3H), 6.21 (d,  $J = 14.7$  Hz, 1H), 5.62 (d,  $J = 2.6$  Hz, 1H), 4.88 (d,  $J = 14.8$  Hz, 1H), 4.53 – 4.41 (m, 3H), 2.35 (dt,  $J = 13.2, 2.8$  Hz, 1H), 2.02 (dt,  $J = 13.2, 2.6$  Hz, 1H), 1.49 (t,  $J = 7.2$  Hz, 3H).  $^{13}\text{C}$  NMR (126 MHz,  $\text{CDCl}_3$ )  $\delta$  159.4, 158.6, 146.4, 139.9, 139.8, 138.8, 136.1, 129.1, 128.9, 128.9, 128.0, 127.8, 126.7, 126.7, 120.1, 118.2, 108.1, 82.8, 61.3, 53.1, 28.7, 27.4, 14.5. HRMS (ESI): Calcd. for  $\text{C}_{25}\text{H}_{23}\text{N}_4\text{O}_3$   $[\text{M}+\text{H}]^+$ : 427.1765; found: 427.1764.

(21) Ethyl-6-benzyl-8-methyl-2,5,6,11-tetrahydro-5,11-methanopyrazolo[4,3-*g*]pyrido[2,3-*d*][1,3]oxazocine-1-carboxylate (**C<sub>21</sub>**)



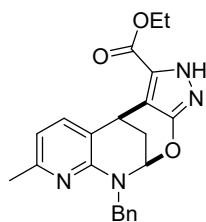

Red solid; M.p. 113-115 °C, (26.5 mg, 40% yield); <sup>1</sup>H NMR (500 MHz, Chloroform-*d*) δ 10.00 (s, 1H), 7.39 (dd, *J* = 7.5, 4.9 Hz, 3H), 7.30 (t, *J* = 7.4 Hz, 2H), 7.24 (d, *J* = 7.3 Hz, 1H), 6.48 (d, *J* = 7.3 Hz, 1H), 5.67 (d, *J* = 15.4 Hz, 2H), 4.53 (d, *J* = 15.3 Hz, 1H), 4.42 (p, *J* = 7.1 Hz, 2H), 4.34 (s, 1H), 2.33 (s, 3H), 2.29 (dt, *J* = 13.1, 3.0 Hz, 1H), 1.97 (dd, *J* = 13.3, 2.6 Hz, 1H), 1.44 (t, *J* = 7.2 Hz, 3H). <sup>13</sup>C NMR (126 MHz, CDCl<sub>3</sub>) δ 159.3, 158.7, 155.0, 152.3, 139.0, 134.1, 128.8, 128.3, 128.2, 126.9, 117.6, 112.9, 108.4, 82.7, 61.2, 48.3, 27.5, 26.8, 24.2, 14.4. HRMS (ESI): Calcd. for C<sub>22</sub>H<sub>23</sub>N<sub>4</sub>O<sub>3</sub> [M+H]<sup>+</sup>: 391.1765; found: 391.1757.

(22) Ethyl-11-benzyl-9-chloro-2,4,11,12-tetrahydro-4,12-methanopyrazolo[4',3':7,8][1,3]oxazocino[5,4-*h*]quinoline-3-carboxylate (C<sub>22</sub>)

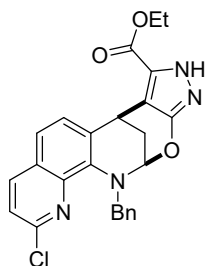

Red solid; M.p. 101-103 °C, (21.1 mg, 27% yield); <sup>1</sup>H NMR (500 MHz, Chloroform-*d*) δ 10.29 (s, 1H), 7.92 (d, *J* = 8.5 Hz, 1H), 7.64 (dd, *J* = 15.5, 7.8 Hz, 3H), 7.31 (t, *J* = 7.4 Hz, 2H), 7.28 – 7.16 (m, 3H), 5.89 (d, *J* = 14.8 Hz, 1H), 5.73 – 5.55 (m, 1H), 4.94 (d, *J* = 14.8 Hz, 1H), 4.61 – 4.36 (m, 3H), 2.36 (dt, *J* = 13.6, 2.9 Hz, 1H), 2.00 (dt, *J* = 13.4, 2.7 Hz, 1H), 1.48 (t, *J* = 7.1 Hz, 3H). <sup>13</sup>C NMR (126 MHz, CDCl<sub>3</sub>) δ 159.3, 158.5, 146.3, 139.1, 139.1, 138.6, 138.0, 129.2, 129.1, 128.8, 128.0, 127.7, 127.0, 126.7, 121.3, 117.8, 107.6, 82.9, 61.4, 53.2, 28.6, 27.4, 14.5. HRMS (ESI): Calcd. for C<sub>25</sub>H<sub>22</sub>N<sub>4</sub>O<sub>3</sub>Cl [M+H]<sup>+</sup>: 461.1375; found: 461.1369.

(23) Ethyl-6-phenethyl-2,5,6,11-tetrahydro-5,11-methanobenzo[*d*]pyrazolo[4,3-*g*][1,3]oxazocine-1-carboxylate (C<sub>23</sub>)

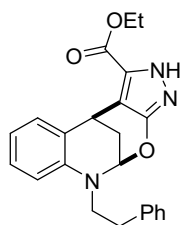

Red solid; M.p. 121-123 °C, (56.9 mg, 86% yield); <sup>1</sup>H NMR (400 MHz, Chloroform-*d*) δ 9.86 (s, 1H), 7.39 – 7.27 (m, 3H), 7.28 – 7.19 (m, 3H), 7.19 – 7.11 (m, 1H), 6.79 (d, *J* = 8.2 Hz, 1H), 6.73 (td, *J* = 7.4, 1.1 Hz, 1H), 5.43 (dt, *J* = 3.6, 1.7 Hz, 1H), 4.56 – 4.29 (m, 3H), 3.96 – 3.83 (m, 1H), 3.71 – 3.61 (m, 1H), 3.04 – 2.87 (m, 2H), 2.21 (dt, *J* = 13.1, 3.0 Hz, 1H), 1.96 (dt, *J* = 13.1, 2.6 Hz, 1H), 1.45 (t, *J* = 7.1 Hz, 3H). <sup>13</sup>C NMR (101 MHz, CDCl<sub>3</sub>) δ 159.3, 159.1, 140.7, 139.2, 129.4,

128.8, 128.6, 127.8, 127.4, 126.8, 126.4, 117.7, 110.5, 108.8, 85.1, 61.2, 50.8, 33.9, 27.8, 26.8, 14.5. HRMS (ESI): Calcd. for  $C_{23}H_{24}N_3O_3$   $[M+H]^+$ : 390.1812; found: 390.1802.

(24) Ethyl-6-ethyl-2,5,6,11-tetrahydro-5,11-methanobenzo[*d*]pyrazolo[4,3-*g*]  
[1,3]oxazocine-1-carboxylate ( $C_{24}$ )

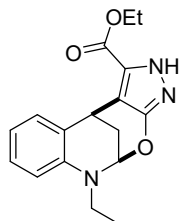

Red solid; M.p. 132-134 °C, (38.3 mg, 72% yield);  $^1H$  NMR (400 MHz, Chloroform-*d*)  $\delta$  10.12 (s, 1H), 7.33 (dd,  $J = 7.6, 1.7$  Hz, 1H), 7.14 – 7.06 (m, 1H), 7.14 – 7.06 (m, 2H), 5.64 (q,  $J = 2.2$  Hz, 1H), 4.52 – 4.31 (m, 3H), 3.84 – 3.71 (m, 1H), 3.52 – 3.41 (m, 1H), 2.29 (dt,  $J = 13.1, 3.0$  Hz, 1H), 1.99 (dt,  $J = 13.0, 2.6$  Hz, 1H), 1.45 (t,  $J = 7.2$  Hz, 3H), 1.22 (t,  $J = 7.1$  Hz, 3H).  $^{13}C$  NMR (101 MHz,  $CDCl_3$ )  $\delta$  159.4, 159.1, 140.6, 128.8, 127.7, 127.2, 126.7, 117.3, 110.5, 108.6, 84.7, 61.2, 43.4, 28.0, 27.1, 14.4, 12.7. HRMS (ESI): Calcd. for  $C_{17}H_{20}N_3O_3$   $[M+H]^+$ : 314.1499; found: 314.1491.

(25) Ethyl-6-(4-(trifluoromethyl)benzyl)-2,5,6,11-tetrahydro-5,11-methanobenzo[*d*]  
pyrazolo[4,3-*g*][1,3]oxazocine-1-carboxylate ( $C_{25}$ )

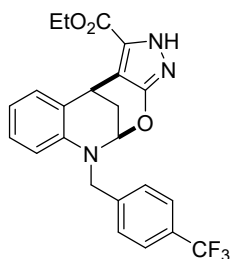

Red solid; M.p. 103-105 °C, (48.2 mg, 64% yield);  $^1H$  NMR (500 MHz, Chloroform-*d*)  $\delta$  10.54 (s, 1H), 7.55 (d,  $J = 8.2$  Hz, 2H), 7.38 (dd,  $J = 7.5, 1.6$  Hz, 1H), 7.31 (d,  $J = 8.0$  Hz, 2H), 6.99 (td,  $J = 7.7, 1.7$  Hz, 1H), 6.73 (t,  $J = 7.4$  Hz, 1H), 6.46 (d,  $J = 8.2$  Hz, 1H), 5.66 (q,  $J = 2.2$  Hz, 1H), 4.99 (d,  $J = 17.8$  Hz, 1H), 4.71 (d,  $J = 17.8$  Hz, 1H), 4.55 – 4.34 (m, 3H), 2.39 (dt,  $J = 13.1, 3.0$  Hz, 1H), 2.16 (dt,  $J = 13.2, 2.6$  Hz, 1H), 1.47 (t,  $J = 7.1$  Hz, 3H).  $^{13}C$  NMR (126 MHz,  $CDCl_3$ )  $\delta$  159.4, 158.7, 142.1, 141.0, 129.4 (d,  $J = 32.3$  Hz), 129.0, 127.8, 127.2, 126.8, 126.6, 125.7 (d,  $J = 4.0$  Hz), 124.1 (d,  $J = 272.0$  Hz), 118.3, 111.2, 108.3, 84.6, 61.3, 52.1, 27.9, 27.3, 14.4.  $^{19}F$  NMR (471 MHz,  $CDCl_3$ )  $\delta$  -62.40. HRMS (ESI): Calcd. for  $C_{23}H_{21}N_3O_3F_3$   $[M+H]^+$ : 444.1530; found: 444.1528.

(26) Ethyl-6-(4-methylbenzyl)-2,5,6,11-tetrahydro-5,11-methanobenzo[*d*]pyrazolo  
[4,3-*g*][1,3]oxazocine-1-carboxylate ( $C_{26}$ )

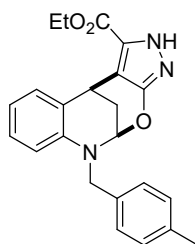

Red solid; M.p. 102-104 °C, (36.4 mg, 55% yield); <sup>1</sup>H NMR (400 MHz, Chloroform-*d*) δ 9.85 (s, 1H), 7.36 (dd, *J* = 7.4, 1.7 Hz, 1H), 7.10 (s, 4H), 6.98 (td, *J* = 7.8, 1.7 Hz, 1H), 6.69 (t, *J* = 7.4 Hz, 1H), 6.56 (d, *J* = 8.2 Hz, 1H), 5.65 (q, *J* = 2.1 Hz, 1H), 4.87 (d, *J* = 17.5 Hz, 1H), 4.62 (d, *J* = 17.5 Hz, 1H), 4.48 – 4.36 (m, 3H), 2.40 – 2.27 (m, 4H), 2.11 (dt, *J* = 13.1, 2.6 Hz, 1H), 1.45 (t, *J* = 7.1 Hz, 3H). <sup>13</sup>C NMR (101 MHz, CDCl<sub>3</sub>) δ 159.4, 158.8, 141.5, 136.5, 134.6, 129.4, 128.9, 127.7, 127.0, 126.6, 126.2, 117.7, 111.3, 108.3, 84.3, 61.2, 51.6, 27.9, 27.2, 20.9, 14.4. HRMS (ESI): Calcd. for C<sub>23</sub>H<sub>24</sub>N<sub>3</sub>O<sub>3</sub> [M+H]<sup>+</sup>: 390.1812; found: 390.1803.

(27) Ethyl-6-(naphthalen-2-ylmethyl)-2,5,6,11-tetrahydro-5,11-methanobenzo[*d*]pyrazolo[4,3-*g*][1,3]oxazocine-1-carboxylate (C<sub>27</sub>)

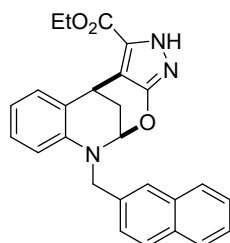

White solid; M.p. 139-141 °C, (53.5 mg, 74% yield); <sup>1</sup>H NMR (500 MHz, Chloroform-*d*) δ 10.57 (s, 1H), 7.78 (d, *J* = 8.5 Hz, 2H), 7.74 – 7.67 (m, 1H), 7.60 (s, 1H), 7.46 – 7.30 (m, 4H), 7.02 – 6.92 (m, 1H), 6.71 (t, *J* = 7.3 Hz, 1H), 6.61 (d, *J* = 8.2 Hz, 1H), 5.72 (s, 1H), 5.07 (d, *J* = 17.5 Hz, 1H), 4.80 (d, *J* = 17.6 Hz, 1H), 4.51 – 4.35 (m, 3H), 2.38 (dt, *J* = 13.2, 2.9 Hz, 1H), 2.20 (dt, *J* = 13.2, 2.7 Hz, 1H), 1.45 (t, *J* = 7.1 Hz, 3H). <sup>13</sup>C NMR (126 MHz, CDCl<sub>3</sub>) δ 159.4, 158.8, 141.5, 135.3, 133.4, 132.6, 128.5, 127.8, 127.6, 127.6, 127.1, 126.7, 126.1, 125.6, 124.7, 124.6, 117.9, 111.4, 108.4, 84.4, 61.2, 52.2, 27.9, 27.3, 14.4. HRMS (ESI): Calcd. for C<sub>26</sub>H<sub>24</sub>N<sub>3</sub>O<sub>3</sub> [M+H]<sup>+</sup>: 426.1812; found: 426.1809.

(28) Ethyl-6-(4-cyanobenzyl)-2,5,6,11-tetrahydro-5,11-methanobenzo[*d*]pyrazolo[4,3-*g*][1,3]oxazocine-1-carboxylate (C<sub>28</sub>)

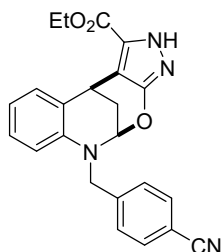

Red solid; M.p. 151-153 °C, (28.6 mg, 42% yield); <sup>1</sup>H NMR (500 MHz, Chloroform-*d*) δ 10.18 (s, 1H), 7.58 (d, *J* = 8.0 Hz, 2H), 7.39 (dd, *J* = 7.4, 1.6 Hz, 1H), 7.30 (d, *J* = 8.0 Hz, 2H), 7.02 – 6.96 (m, 1H), 6.74 (t, *J* = 7.4 Hz, 1H), 6.41 (d, *J* = 8.2 Hz, 1H), 5.66 (d, *J* = 2.9 Hz, 1H), 5.01 (d, *J* = 18.1 Hz, 1H), 4.71 (d, *J* = 18.1 Hz, 1H), 4.60 – 4.31 (m, 3H), 2.41 (dt, *J* = 13.1, 3.0 Hz, 1H), 2.17

(dt,  $J = 13.2, 2.7$  Hz, 1H), 1.48 (t,  $J = 7.2$  Hz, 3H).  $^{13}\text{C}$  NMR (126 MHz,  $\text{CDCl}_3$ )  $\delta$  159.2, 158.8, 143.7, 140.8, 132.6, 129.0, 127.8, 127.3, 127.1, 126.9, 118.7, 118.5, 111.1, 111.0, 108.3, 84.8, 61.4, 52.4, 27.8, 27.3, 14.5. HRMS (ESI): Calcd. for  $\text{C}_{23}\text{H}_{21}\text{N}_4\text{O}_3$   $[\text{M}+\text{H}]^+$ : 401.1608; found: 401.1608.

(29) Ethyl-6-(4-bromobenzyl)-2,5,6,11-tetrahydro-5,11-methanobenzo[*d*]pyrazolo  
[4,3-*g*][1,3]oxazocine-1-carboxylate (**C<sub>29</sub>**)

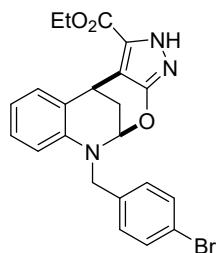

Red solid; M.p. 111-113 °C, (39.3 mg, 51% yield);  $^1\text{H}$  NMR (400 MHz, Chloroform-*d*)  $\delta$  10.39 (s, 1H), 7.49 – 7.36 (m, 3H), 7.11 (d,  $J = 8.3$  Hz, 2H), 7.06 – 7.01 (m, 1H), 6.75 (td,  $J = 7.4, 1.1$  Hz, 1H), 6.53 (d,  $J = 8.2$  Hz, 1H), 5.68 (q,  $J = 2.6$  Hz, 1H), 4.91 (d,  $J = 17.6$  Hz, 1H), 4.65 (d,  $J = 17.6$  Hz, 1H), 4.54 – 4.40 (m, 3H), 2.41 (dt,  $J = 13.1, 3.0$  Hz, 1H), 2.17 (dt,  $J = 13.1, 2.6$  Hz, 1H), 1.50 (t,  $J = 7.1$  Hz, 3H).  $^{13}\text{C}$  NMR (101 MHz,  $\text{CDCl}_3$ )  $\delta$  159.3, 158.8, 141.1, 136.9, 131.8, 128.9, 128.1, 127.7, 127.2, 126.7, 120.8, 118.2, 111.2, 108.3, 84.5, 61.3, 51.7, 27.9, 27.3, 14.4. HRMS (ESI): Calcd. for  $\text{C}_{22}\text{H}_{21}\text{N}_3\text{O}_3\text{Br}$   $[\text{M}+\text{H}]^+$ : 454.0760; found: 454.0748.

(30) Ethyl-6-(4-nitrobenzyl)-2,5,6,11-tetrahydro-5,11-methanobenzo[*d*]pyrazolo  
[4,3-*g*][1,3]oxazocine-1-carboxylate (**C<sub>30</sub>**)

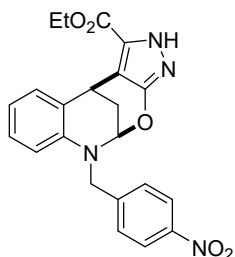

Yellow solid; M.p. 165-167 °C, (22.1 mg, 31% yield);  $^1\text{H}$  NMR (400 MHz, Chloroform-*d*)  $\delta$  10.15 (s, 1H), 8.17 (d,  $J = 8.3$  Hz, 2H), 7.40 (dd,  $J = 20.3, 7.9$  Hz, 3H), 7.01 (t,  $J = 7.8$  Hz, 1H), 6.77 (t,  $J = 7.4$  Hz, 1H), 6.44 (d,  $J = 8.2$  Hz, 1H), 5.70 (s, 1H), 5.08 (d,  $J = 18.1$  Hz, 1H), 4.79 (s, 1H), 4.53 – 4.44 (m, 3H), 2.45 (dt,  $J = 13.2, 3.1$  Hz, 1H), 2.28 – 2.11 (m, 1H), 1.50 (t,  $J = 7.1$  Hz, 3H).  $^{13}\text{C}$  NMR (126 MHz,  $\text{CDCl}_3$ )  $\delta$  159.2, 158.8, 147.2, 145.9, 140.7, 129.0, 127.9, 127.4, 127.2, 127.0, 124.1, 118.7, 111.2, 108.4, 85.0, 61.4, 52.4, 27.9, 27.4, 14.5. HRMS (ESI): Calcd. for  $\text{C}_{22}\text{H}_{21}\text{N}_4\text{O}_5$   $[\text{M}+\text{H}]^+$ : 421.1506; found: 421.1501.

(31) Ethyl-6-(4-phenylbutyl)-2,5,6,11-tetrahydro-5,11-methanobenzo[*d*]pyrazolo  
[4,3-*g*][1,3]oxazocine-1-carboxylate (**C<sub>31</sub>**)

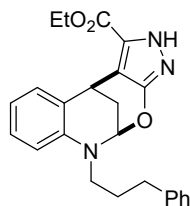

Red solid; M.p. 113-115 °C, (45.9 mg, 67% yield); <sup>1</sup>H NMR (400 MHz, Chloroform-*d*) δ 10.22 (s, 1H), 7.37 (dd, *J* = 7.4, 1.7 Hz, 1H), 7.36 – 7.28 (m, 2H), 7.26 – 7.18 (m, 3H), 7.12 (td, *J* = 7.8, 1.7 Hz, 1H), 6.73 (td, *J* = 7.3, 1.0 Hz, 1H), 6.66 (d, *J* = 8.2 Hz, 1H), 5.66 (q, *J* = 2.2 Hz, 1H), 4.56 – 4.33 (m, 3H), 3.82 – 3.68 (m, 1H), 3.46 – 3.37 (m, 1H), 2.69 (td, *J* = 7.3, 2.8 Hz, 2H), 2.31 (dt, *J* = 13.0, 3.0 Hz, 1H), 2.03 (dt, *J* = 13.1, 2.6 Hz, 1H), 1.74 (dq, *J* = 8.7, 5.7, 4.5 Hz, 4H), 1.49 (t, *J* = 7.2 Hz, 3H). <sup>13</sup>C NMR (101 MHz, CDCl<sub>3</sub>) δ 159.4, 159.0, 142.2, 140.9, 128.8, 128.3, 128.3, 127.6, 127.2, 126.6, 125.8, 117.4, 110.6, 108.6, 84.9, 61.2, 49.0, 35.6, 28.8, 27.9, 27.0, 26.9, 14.4. HRMS (ESI): Calcd. for C<sub>25</sub>H<sub>28</sub>N<sub>3</sub>O<sub>3</sub> [M+H]<sup>+</sup>: 418.2125; found: 418.2120.

(32) 9-(adamantan-1-yl) 1-ethyl-6-benzyl-2,5,6,11-tetrahydro-5,11-methanobenzo[*d*]pyrazolo[4,3-*g*][1,3]oxazocine-1,9-dicarboxylate (C<sub>32</sub>)

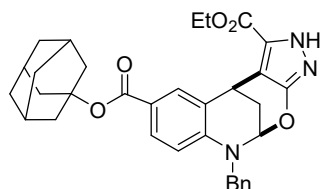

Red solid; M.p. 125-127 °C, (61.1 mg, 65% yield); <sup>1</sup>H NMR (500 MHz, Chloroform-*d*) δ 10.88 (s, 1H), 7.96 (s, 1H), 7.65 (d, *J* = 8.6 Hz, 1H), 7.29 (t, *J* = 7.5 Hz, 2H), 7.23 (t, *J* = 7.4 Hz, 1H), 7.15 (d, *J* = 7.5 Hz, 2H), 6.53 (d, *J* = 8.7 Hz, 1H), 5.65 (s, 1H), 4.94 (d, *J* = 17.5 Hz, 1H), 4.72 (d, *J* = 17.5 Hz, 1H), 4.59 – 4.39 (m, 3H), 2.39 (d, *J* = 13.1 Hz, 1H), 2.19 (d, *J* = 14.9 Hz, 8H), 2.10 (d, *J* = 13.2 Hz, 1H), 1.73 – 1.63 (m, 7H), 1.55 (t, *J* = 7.2 Hz, 3H). <sup>13</sup>C NMR (126 MHz, CDCl<sub>3</sub>) δ 165.4, 159.6, 158.4, 145.0, 136.9, 129.8, 129.1, 128.8, 128.2, 127.1, 126.1, 125.9, 121.4, 110.6, 107.3, 83.9, 80.0, 61.5, 52.1, 41.4, 36.2, 31.5, 30.8, 27.9, 27.1, 22.5, 14.6, 14.0. HRMS (ESI): Calcd. for C<sub>33</sub>H<sub>36</sub>N<sub>3</sub>O<sub>5</sub> [M+H]<sup>+</sup>: 554.2649; found: 554.2643.

(33) 9-(adamantan-1-ylmethyl) 1-ethyl-6-benzyl-3,5,6,11-tetrahydro-5,11-methanobenzo[*d*]pyrazolo[4,3-*g*][1,3]oxazocine-1,9-dicarboxylate (C<sub>33</sub>)

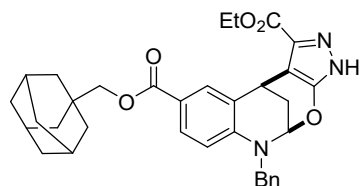

Red solid; M.p. 118-120 °C, (39.5 mg, 41% yield); <sup>1</sup>H NMR (500 MHz, Chloroform-*d*) δ 10.74 (s, 1H), 8.08 (d, *J* = 2.1 Hz, 1H), 7.71 (dd, *J* = 8.6, 2.1 Hz, 1H), 7.31 (t, *J* = 7.5 Hz, 2H), 7.25 (d, *J* = 7.1 Hz, 1H), 7.17 (d, *J* = 7.5 Hz, 2H), 6.56 (d, *J* = 8.6 Hz, 1H), 5.67 (s, 1H), 4.96 (d, *J* = 17.5 Hz, 1H), 4.73 (d, *J* = 17.5 Hz, 1H), 4.56 – 4.39 (m, 3H), 3.86 (q, *J* = 10.7 Hz, 2H), 2.41 (dt, *J* = 13.2, 2.9 Hz, 1H), 2.14 (dt, *J* = 13.2, 2.7 Hz, 1H), 2.00 – 1.87 (m, 3H), 1.76 – 1.63 (m, 7H), 1.60 (s, 5H), 1.54 (t, *J* = 7.2 Hz, 3H). <sup>13</sup>C NMR (126 MHz, CDCl<sub>3</sub>) δ 166.6, 159.4, 158.4, 145.4, 136.8, 129.8,

129.1, 128.8, 128.6, 127.2, 126.2, 126.1, 119.8, 110.7, 107.4, 83.9, 73.8, 61.6, 52.2, 39.3, 36.9, 33.5, 31.5, 28.0, 27.9, 27.0, 22.6, 14.4, 14.1. HRMS (ESI): Calcd. for C<sub>34</sub>H<sub>38</sub>N<sub>3</sub>O<sub>5</sub> [M+H]<sup>+</sup>: 568.2806; found: 568.2801.

(34) 1-ethyl 9-(furan-2-ylmethyl)-6-benzyl-2,5,6,11-tetrahydro-5,11-methanobenzo[*d*]pyrazolo[4,3-*g*][1,3]oxazocine-1,9-dicarboxylate (C<sub>34</sub>)

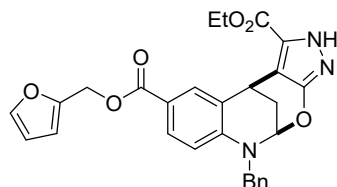

Light yellow solid; M.p. 143-145 °C, (39.0 mg, 46% yield); <sup>1</sup>H NMR (500 MHz, Chloroform-*d*) δ 10.90 (s, 1H), 8.01 (s, 1H), 7.71 (dd, *J* = 8.6, 2.2 Hz, 1H), 7.40 (s, 1H), 7.29 (t, *J* = 7.4 Hz, 2H), 7.23 (d, *J* = 7.2 Hz, 1H), 7.15 (d, *J* = 7.5 Hz, 2H), 6.54 (d, *J* = 8.6 Hz, 1H), 6.43 (d, *J* = 3.3 Hz, 1H), 6.35 (t, *J* = 2.5 Hz, 1H), 5.64 (s, 1H), 5.27 (d, *J* = 13.1 Hz, 1H), 5.19 (d, *J* = 13.1 Hz, 1H), 4.93 (d, *J* = 17.5 Hz, 1H), 4.72 (d, *J* = 17.5 Hz, 1H), 4.51 – 4.38 (m, 3H), 2.38 (dt, *J* = 13.2, 2.9 Hz, 1H), 2.09 (dt, *J* = 13.1, 2.7 Hz, 1H), 1.47 (t, *J* = 7.2 Hz, 3H). <sup>13</sup>C NMR (126 MHz, CDCl<sub>3</sub>) δ 166.0, 159.6, 158.4, 149.8, 145.6, 143.0, 136.7, 130.2, 129.1, 128.8, 128.5, 127.2, 126.1, 118.9, 110.8, 110.5, 110.4, 107.1, 83.8, 61.6, 57.9, 52.1, 27.9, 26.9, 14.1. HRMS (ESI): Calcd. for C<sub>28</sub>H<sub>26</sub>N<sub>3</sub>O<sub>6</sub> [M+H]<sup>+</sup>: 500.1816; found: 500.1810.

(35) 9-cinnamyl 1-ethyl-6-benzyl-2,5,6,11-tetrahydro-5,11-methanobenzo[*d*]pyrazolo[4,3-*g*][1,3]oxazocine-1,9-dicarboxylate (C<sub>35</sub>)

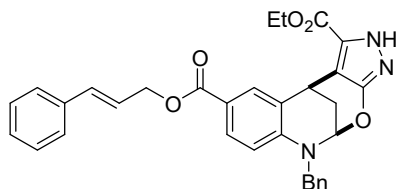

Red solid; M.p. 122-124 °C, (47.3 mg, 52% yield); <sup>1</sup>H NMR (500 MHz, Chloroform-*d*) δ 10.92 (s, 1H), 8.07 (d, *J* = 2.3 Hz, 1H), 7.74 (dd, *J* = 8.7, 2.2 Hz, 1H), 7.38 (d, *J* = 7.5 Hz, 2H), 7.33 – 7.27 (m, 4H), 7.24 (q, *J* = 7.6, 6.7 Hz, 2H), 7.16 (d, *J* = 7.5 Hz, 2H), 6.69 (d, *J* = 15.9 Hz, 1H), 6.56 (d, *J* = 8.7 Hz, 1H), 6.42 – 6.26 (m, 1H), 5.65 (d, *J* = 3.4 Hz, 1H), 5.00 – 4.88 (m, 3H), 4.73 (d, *J* = 17.5 Hz, 1H), 4.51 – 4.35 (m, 3H), 2.39 (dt, *J* = 13.2, 2.9 Hz, 1H), 2.20 – 2.08 (m, 1H), 1.50 (t, *J* = 7.1 Hz, 3H). <sup>13</sup>C NMR (126 MHz, CDCl<sub>3</sub>) δ 166.2, 159.6, 158.4, 145.6, 136.7, 136.2, 133.8, 130.1, 128.8, 128.6, 128.5, 128.3, 127.9, 127.2, 126.5, 126.1, 126.1, 123.6, 119.2, 110.8, 107.2, 83.8, 64.9, 61.7, 52.1, 27.9, 27.0, 14.3. HRMS (ESI): Calcd. for C<sub>32</sub>H<sub>30</sub>N<sub>3</sub>O<sub>5</sub> [M+H]<sup>+</sup>: 536.2180; found: 536.2175.

(36) 9-(benzo[*d*][1,3]dioxol-5-ylmethyl) 1-ethyl-6-benzyl-2,5,6,11-tetrahydro-5,11-methanobenzo[*d*]pyrazolo[4,3-*g*][1,3]oxazocine-1,9-dicarboxylate (C<sub>36</sub>)

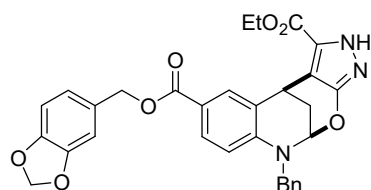

Red solid; M.p. 121-123 °C, (63.9 mg, 68% yield); <sup>1</sup>H NMR (500 MHz, Chloroform-*d*) δ 10.98 (s, 1H), 8.02 (s, 1H), 7.71 (d, *J* = 8.6 Hz, 1H), 7.29 (t, *J* = 7.5 Hz, 2H), 7.22 (t, *J* = 7.5 Hz, 1H), 7.15 (d, *J* = 7.6 Hz, 2H), 6.93 – 6.83 (m, 2H), 6.76 (d, *J* = 7.9 Hz, 1H), 6.54 (d, *J* = 8.7 Hz, 1H), 5.92 (s, 2H), 5.64 (s, 1H), 5.30 – 5.10 (m, 2H), 4.92 (d, *J* = 17.5 Hz, 1H), 4.71 (d, *J* = 17.5 Hz, 1H), 4.50 – 4.32 (m, 3H), 2.38 (d, *J* = 13.2 Hz, 1H), 2.09 (d, *J* = 13.2 Hz, 1H), 1.44 (t, *J* = 7.2 Hz, 3H). <sup>13</sup>C NMR (126 MHz, CDCl<sub>3</sub>) δ 166.2, 159.6, 158.3, 147.6, 147.4, 145.5, 136.7, 130.1, 130.1, 129.1, 128.8, 128.5, 127.2, 126.1, 126.1, 122.0, 119.1, 110.8, 108.9, 108.1, 107.2, 101.0, 83.8, 66.0, 61.6, 52.1, 27.8, 26.9, 14.2. HRMS (ESI): Calcd. for C<sub>31</sub>H<sub>26</sub>N<sub>3</sub>O<sub>7</sub> [M-H]<sup>-</sup>: 552.1776; found: 552.1773.

(37) 9-(2-(1-(sec-butoxycarbonyl)piperidin-2-yl)ethyl) 1-ethyl -6-benzyl-2,5,6,11-tetrahydro-5,11-methanobenzo[*d*]pyrazolo[4,3-*g*][1,3]oxazocine-1,9-dicarboxylate (C<sub>37</sub>)

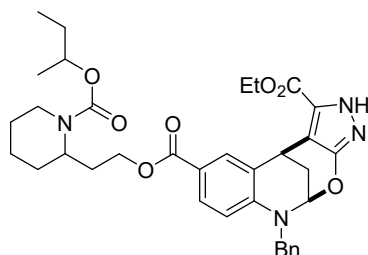

Red solid; M.p. 98 -100 °C, (66.4 mg, 62% yield); <sup>1</sup>H NMR (500 MHz, Chloroform-*d*) δ 10.90 (s, 1H), 8.04 (s, 1H), 7.70 (d, *J* = 8.6 Hz, 1H), 7.31 (t, *J* = 7.4 Hz, 2H), 7.25 (q, *J* = 7.4, 6.6 Hz, 1H), 7.17 (d, *J* = 7.5 Hz, 2H), 6.55 (d, *J* = 8.7 Hz, 1H), 5.67 (s, 1H), 4.95 (d, *J* = 17.5 Hz, 1H), 4.80 – 4.66 (m, 2H), 4.56 – 4.40 (m, 4H), 4.31 – 4.21 (m, 2H), 4.06 (s, 1H), 2.85 (t, *J* = 13.4 Hz, 1H), 2.51 – 2.32 (m, 1H), 2.17 – 2.01 (m, 3H), 1.92 – 1.79 (m, 1H), 1.65 – 1.39 (m, 7H), 1.42 (dt, *J* = 13.5, 6.6 Hz, 2H), 1.14 (t, *J* = 5.5 Hz, 3H), 0.90 – 0.77 (m, 4H). <sup>13</sup>C NMR (126 MHz, CDCl<sub>3</sub>) δ 166.4, 159.5, 158.3, 155.4, 145.4, 136.8, 129.8, 129.1, 128.8, 128.6, 127.2, 126.1, 126.1, 119.4, 110.7, 107.2, 83.8, 72.9, 62.0, 61.6, 52.1, 47.9, 47.9, 28.9, 27.9, 27.0, 25.4, 19.6, 19.6, 18.9, 14.3, 9.6, 9.6. HRMS (ESI): Calcd. for C<sub>35</sub>H<sub>41</sub>N<sub>4</sub>O<sub>7</sub> [M-H]<sup>-</sup>: 629.2981; found: 629.2979.

(38) 1-ethyl 9-heptyl -6-benzyl-2,5,6,11-tetrahydro-5,11-methanobenzo[*d*]pyrazolo[4,3-*g*][1,3]oxazocine-1,9-dicarboxylate (C<sub>38</sub>)

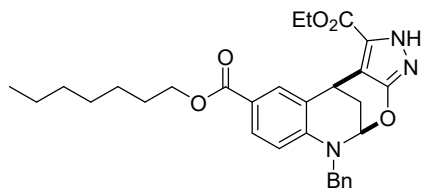

Red solid; M.p. 107 -109 °C, (47.5 mg, 54% yield); <sup>1</sup>H NMR (500 MHz, Chloroform-*d*) δ 10.89 (s, 1H), 8.04 (d, *J* = 2.1 Hz, 1H), 7.70 (dd, *J* = 8.6, 2.1 Hz, 1H), 7.31 (t, *J* = 7.5 Hz, 2H), 7.25 (d, *J* = 7.0 Hz, 1H), 7.17 (d, *J* = 7.6 Hz, 2H), 6.56 (d, *J* = 8.6 Hz, 1H), 5.67 (s, 1H), 4.95 (d, *J* = 17.5 Hz, 1H), 4.74 (d, *J* = 17.5 Hz, 1H), 4.59 – 4.42 (m, 3H), 4.25 (t, *J* = 6.7 Hz, 2H), 2.41 (dt, *J* = 13.2, 2.9 Hz, 1H), 2.12 (dt, *J* = 13.1, 2.6 Hz, 1H), 1.75 – 1.67 (m, 2H), 1.57 (t, *J* = 7.1 Hz, 3H), 1.45 – 1.23 (m, 8H), 0.88 (t, *J* = 6.7 Hz, 3H). <sup>13</sup>C NMR (126 MHz, CDCl<sub>3</sub>) δ 166.6, 159.6, 158.4, 145.4, 136.8, 129.9, 128.8, 128.5, 127.2, 126.1, 119.7, 110.8, 107.3, 83.9, 64.5, 61.7, 52.1, 31.7, 28.9, 28.8, 27.9, 27.0, 25.9, 22.5, 14.3, 14.0. HRMS (ESI): Calcd. for C<sub>30</sub>H<sub>36</sub>N<sub>3</sub>O<sub>5</sub> [M+H]<sup>+</sup>: 518.2649; found: 518.2647.

(39) 1-ethyl 9-1,7,7-trimethylbicyclo[2.2.1]heptan-2-yl)-6-benzyl-2,5,6,11-tetrahydro-5,11-methanobenzo[*d*]pyrazolo[4,3-*g*][1,3]oxazocine-1,9-dicarboxylate (C<sub>39</sub>)

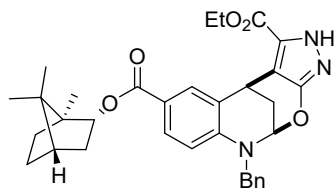

Red solid; M.p. 117 - 119 °C, (52.9 mg, 56% yield); <sup>1</sup>H NMR (500 MHz, Chloroform-*d*) δ 10.58 (s, 1H), 8.06 (s, 1H), 7.73 (d, *J* = 8.6 Hz, 1H), 7.32 (t, *J* = 7.5 Hz, 2H), 7.26 (d, *J* = 6.8 Hz, 1H), 7.18 (d, *J* = 7.5 Hz, 2H), 6.57 (d, *J* = 8.6 Hz, 1H), 5.68 (s, 1H), 5.06 (td, *J* = 9.5, 4.8 Hz, 1H), 4.96 (d, *J* = 17.5 Hz, 1H), 4.74 (d, *J* = 17.5 Hz, 1H), 4.59 – 4.42 (m, 3H), 2.57 – 2.33 (m, 2H), 2.25 – 1.98 (m, 2H), 1.89 – 1.64 (m, 2H), 1.57 – 1.51 (m, 3H), 1.41 – 1.20 (m, 2H), 1.06 (dt, *J* = 13.7, 3.4 Hz, 1H), 0.94 (s, 3H), 0.90 – 0.84 (m, 6H). <sup>13</sup>C NMR (126 MHz, CDCl<sub>3</sub>) δ 166.7, 166.7, 159.4, 159.4, 158.5, 145.3, 145.3, 136.8, 129.8, 129.2, 128.9, 128.5, 127.3, 126.2, 126.1, 120.2, 120.2, 110.7, 107.6, 107.5, 84.0, 83.9, 79.7, 79.6, 61.6, 61.6, 52.2, 52.2, 49.0, 49.0, 47.8, 47.7, 44.9, 44.9, 36.9, 36.9, 28.0, 27.9, 27.9, 27.4, 27.3, 27.1, 27.1, 19.7, 18.9, 14.5, 14.5, 13.5, 13.5. HRMS (ESI): Calcd. for C<sub>33</sub>H<sub>38</sub>N<sub>3</sub>O<sub>5</sub> [M+H]<sup>+</sup>: 556.2806; found: 556.2801.

(40) 1-ethyl 9-(heptan-2-yl)-6-benzyl-2,5,6,11-tetrahydro-5,11-methanobenzo[*d*]pyrazolo[4,3-*g*][1,3]oxazocine-1,9-dicarboxylate (C<sub>40</sub>)

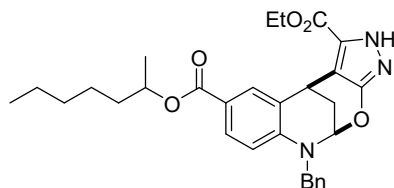

Red solid; M.p. 95 - 97 °C, (44.8 mg, 51% yield); <sup>1</sup>H NMR (500 MHz, Chloroform-*d*) δ 11.27 (s, 1H), 8.04 (d, *J* = 6.4 Hz, 1H), 7.71 (d, *J* = 8.2 Hz, 1H), 7.29 (t, *J* = 7.5 Hz, 2H), 7.23 (q, *J* = 7.4, 6.1 Hz, 1H), 7.16 (d, *J* = 7.6 Hz, 2H), 6.56 (d, *J* = 8.7 Hz, 1H), 5.66 (s, 1H), 5.12 (p, *J* = 6.3 Hz, 1H), 4.94 (d, *J* = 17.5 Hz, 1H), 4.72 (d, *J* = 17.5 Hz, 1H), 4.61 – 4.35 (m, 3H), 2.40 (d, *J* = 13.1 Hz, 1H), 2.11 (d, *J* = 13.2 Hz, 1H), 1.80 – 1.48 (m, 5H), 1.44 – 1.17 (m, 9H), 0.87 (d, *J* = 6.6 Hz, 3H). <sup>13</sup>C NMR (126 MHz, CDCl<sub>3</sub>) δ 166.0, 166.0, 159.7, 159.6, 158.3, 145.3, 145.2, 136.8, 136.8, 129.8, 129.8, 129.1, 128.7, 128.4, 128.3, 127.1, 126.1, 126.0, 120.0, 120.0, 110.7, 110.7, 107.2, 107.1, 83.8, 83.8, 70.8, 70.7, 61.6, 61.5, 52.1, 52.1, 36.0, 36.0, 31.6, 31.5, 27.9, 27.9, 27.0, 25.0, 22.4, 20.1, 20.1, 14.4, 14.4, 13.9, 13.9. HRMS (ESI): Calcd. for C<sub>30</sub>H<sub>36</sub>N<sub>3</sub>O<sub>5</sub> [M+H]<sup>+</sup>: 518.2649; found: 518.2644.

(41) 9-(3,7-dimethyloct-6-en-1-yl) 1-ethyl-6-benzyl-2,5,6,11-tetrahydro-5,11-methanobenzo[*d*]pyrazolo[4,3-*g*][1,3]oxazocine-1,9-dicarboxylate (C<sub>41</sub>)

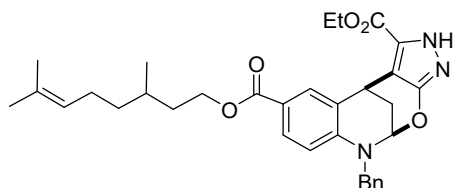

Red solid; M.p. 97 - 99 °C, (64.4 mg, 68% yield); <sup>1</sup>H NMR (500 MHz, Chloroform-*d*) δ 10.78 (s,



1H), 8.04 (s, 1H), 7.69 (d,  $J = 8.6$  Hz, 1H), 7.31 (t,  $J = 7.5$  Hz, 2H), 7.25 (d,  $J = 6.8$  Hz, 1H), 7.17 (d,  $J = 7.6$  Hz, 2H), 6.56 (d,  $J = 8.6$  Hz, 1H), 5.67 (s, 1H), 5.08 (t,  $J = 7.3$  Hz, 1H), 4.95 (d,  $J = 17.5$  Hz, 1H), 4.74 (d,  $J = 17.5$  Hz, 1H), 4.56 – 4.40 (m, 3H), 4.77 – 4.43 (m, 2H), 2.41 (dt,  $J = 13.5, 3.1$  Hz, 1H), 2.13 (d,  $J = 13.2$  Hz, 1H), 2.05 – 1.92 (m, 3H), 1.84 – 1.72 (m, 2H), 1.67 – 1.47 (m, 9H), 1.42 – 1.31 (m, 1H), 1.21 (dt,  $J = 14.3, 7.4$  Hz, 1H), 0.94 (d,  $J = 6.6$  Hz, 3H).  $^{13}\text{C}$  NMR (126 MHz,  $\text{CDCl}_3$ )  $\delta$  166.6, 159.6, 158.5, 145.4, 136.8, 131.2, 129.9, 129.1, 128.8, 128.5, 127.2, 126.1, 124.5, 119.7, 110.8, 109.7, 107.3, 83.8, 62.9, 61.7, 52.1, 37.0, 35.6, 29.5, 27.9, 27.1, 25.6, 25.3, 19.4, 17.6, 14.4. HRMS (ESI): Calcd. for  $\text{C}_{33}\text{H}_{40}\text{N}_3\text{O}_5$   $[\text{M}+\text{H}]^+$ : 558.2962; found: 558.2959.

(42) 1-ethyl 9-3-hydroxy-13-methyl-7,8,9,11,12,13,14,15,16,17-decahydro-6*H*-cyclopenta[*a*]phenanthren-17-yl) -6-benzyl-2,5,6,11-tetrahydro-5,11-methanobenzo[*d*]pyrazolo[4,3-*g*][1,3]oxazocine-1,9-dicarboxylate ( $\text{C}_{42}$ )

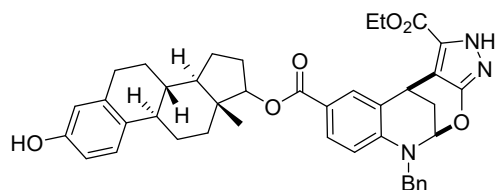

Light yellow solid; M.p. 128 - 130 °C, (73.3 mg, 64% yield);  $^1\text{H}$  NMR (500 MHz, Chloroform-*d*)  $\delta$  10.64 (s, 1H), 8.06 (dd,  $J = 11.3, 2.0$  Hz, 1H), 7.84 – 7.60 (m, 1H), 7.30 (t,  $J = 7.4$  Hz, 2H), 7.27 – 7.21 (m, 1H), 7.15 (d,  $J = 7.6$  Hz, 2H), 7.08 (d,  $J = 8.5$  Hz, 1H), 6.73 – 6.62 (m, 1H), 6.59 (d,  $J = 2.6$  Hz, 1H), 6.55 (dd,  $J = 8.9, 2.1$  Hz, 1H), 5.66 (s, 1H), 5.06 – 4.83 (m, 2H), 4.71 (d,  $J = 17.6$  Hz, 1H), 4.60 – 4.36 (m, 3H), 2.87 – 2.63 (m, 2H), 2.48 – 2.37 (m, 1H), 2.33 – 2.19 (m, 2H), 2.20 – 2.09 (m, 2H), 1.93 – 1.81 (m, 2H), 1.75 (dd,  $J = 13.5, 5.9$  Hz, 1H), 1.68 – 1.61 (m, 1H), 1.52 (dt,  $J = 9.2, 7.2$  Hz, 3H), 1.48 – 1.37 (m, 4H), 1.33 – 1.22 (m, 3H), 0.92 (s, 3H).  $^{13}\text{C}$  NMR (126 MHz,  $\text{CDCl}_3$ )  $\delta$  166.7, 159.5, 159.4, 158.4, 153.8, 145.4, 145.4, 137.9, 137.9, 136.8, 136.8, 131.9, 129.9, 129.9, 129.3, 129.2, 128.8, 128.6, 128.5, 127.3, 126.3, 126.2, 126.2, 126.1, 119.9, 119.9, 115.3, 112.8, 110.8, 107.6, 107.4, 84.0, 84.0, 82.6, 82.6, 61.7, 61.7, 52.2, 52.2, 49.7, 49.7, 43.7, 43.3, 43.2, 38.5, 36.9, 36.8, 29.5, 27.9, 27.8, 27.7, 27.6, 27.1, 27.0, 27.0, 26.2, 23.3, 23.3, 14.5, 14.4, 12.2, 12.2. HRMS (ESI): Calcd. for  $\text{C}_{41}\text{H}_{42}\text{N}_3\text{O}_6$   $[\text{M}-\text{H}]^-$ : 672.3079; found: 672.3078.

(43) 9-10,13-dimethyl-17-((*R*)-6-methylheptan-2-yl)hexadecahydro-1*H*-cyclopenta[*a*]phenanthrene-3-yl)1-ethyl-6-benzyl-2,5,6,11-tetrahydro-5,11-methanobenzo[*d*]pyrazolo[4,3-*g*][1,3]Oxazocine-1,9-dicarboxylate ( $\text{C}_{43}$ )

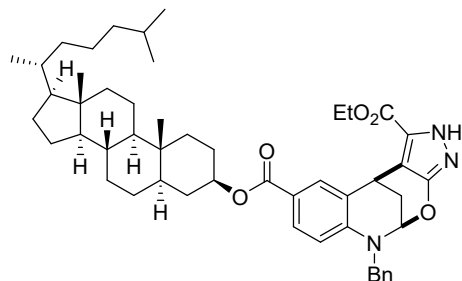

Red solid; M.p. 141 - 143 °C, (33.6 mg, 25% yield);  $^1\text{H}$  NMR (500 MHz, Chloroform-*d*)  $\delta$  10.50 (s, 1H), 8.01 (d,  $J = 2.2$  Hz, 1H), 7.70 (dd,  $J = 8.7, 2.2$  Hz, 1H), 7.31 (t,  $J = 7.4$  Hz, 2H), 7.28 – 7.23 (m, 1H), 7.16 (d,  $J = 7.5$  Hz, 2H), 6.55 (d,  $J = 8.6$  Hz, 1H), 5.66 (s, 1H), 5.12 – 4.85 (m, 2H), 4.74 (d,  $J = 17.5$  Hz, 1H), 4.58 – 4.33 (m, 3H), 2.41 (dt,  $J = 13.2, 3.0$  Hz, 1H), 2.12 (dt,  $J = 13.2,$

2.8 Hz, 1H), 1.97 (dt,  $J = 12.6, 3.5$  Hz, 1H), 1.89 (dt,  $J = 13.3, 4.3$  Hz, 1H), 1.87 – 1.77 (m, 1H), 1.75 (dt,  $J = 13.6, 4.0$  Hz, 1H), 1.66 (dt,  $J = 11.9, 5.1$  Hz, 2H), 1.63 – 1.47 (m, 7H), 1.40 – 1.19 (m, 10H), 1.17 – 0.96 (m, 10H), 0.92 – 0.82 (m, 13H), 0.65 (s, 3H).  $^{13}\text{C}$  NMR (126 MHz,  $\text{CDCl}_3$ )  $\delta$  166.0, 159.6, 158.6, 145.3, 136.9, 130.0, 129.1, 128.9, 128.4, 127.3, 126.2, 126.0, 120.2, 110.8, 107.3, 83.9, 73.6, 61.7, 56.4, 56.2, 54.2, 52.2, 44.7, 44.6, 42.6, 40.0, 39.5, 36.8, 36.1, 35.8, 35.5, 34.2, 34.2, 32.0, 28.6, 28.2, 28.0, 27.7, 27.6, 27.1, 24.2, 23.8, 22.8, 22.5, 21.2, 18.6, 14.6, 12.2, 12.0. HRMS (ESI): Calcd. for  $\text{C}_{50}\text{H}_{66}\text{N}_3\text{O}_5$  [M-H] $^-$ : 788.5008; found: 788.5005.

(44) 9-10,13-dimethyl-17-((R)-6-methylheptan-2-yl)-2,3,4,7,8,9,10,11,12,13,14,15,16,17-tetradecahydro-1H-cyclopenta[a]phenanthren-3-yl)1-ethyl-6-benzyl-2,5,6,11-tetrahydro-5,11-methanobenzo[d]pyrazolo[4,3-g][1,3]oxazocine-1,9-dicarboxylate (C<sub>44</sub>)

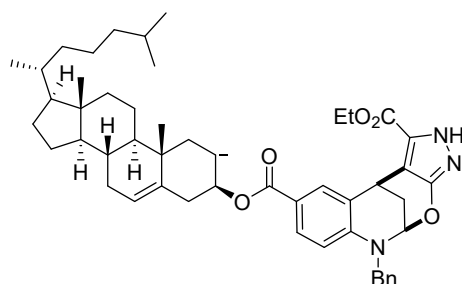

Red solid; M.p. 137 - 139 °C, (41.4 mg, 31% yield);  $^1\text{H}$  NMR (500 MHz, Chloroform- $d$ )  $\delta$  10.17 (s, 1H), 8.02 (s, 1H), 7.71 (d,  $J = 8.6$  Hz, 1H), 7.32 (t,  $J = 7.3$  Hz, 2H), 7.26 (d,  $J = 5.3$  Hz, 1H), 7.17 (d,  $J = 7.4$  Hz, 2H), 6.57 (d,  $J = 8.7$  Hz, 1H), 5.67 (s, 1H), 5.40 (s, 1H), 4.96 (d,  $J = 17.6$  Hz, 1H), 4.86 – 4.69 (m, 2H), 4.59 – 4.39 (m, 3H), 2.42 (d,  $J = 10.5$  Hz, 3H), 2.13 (d,  $J = 13.2$  Hz, 1H), 2.06 – 1.92 (m, 4H), 1.91 – 1.79 (m, 3H), 1.74 – 1.65 (m, 3H), 1.60 (t,  $J = 7.1$  Hz, 3H), 1.56 – 1.43 (m, 6H), 1.37 – 1.31 (m, 4H), 1.29 – 1.24 (m, 1H), 1.22 – 1.07 (m, 5H), 1.04 (s, 3H), 0.92 (d,  $J = 6.4$  Hz, 3H), 0.88 – 0.87 (m, 3H), 0.86 (s, 3H), 0.68 (s, 3H).  $^{13}\text{C}$  NMR (126 MHz,  $\text{CDCl}_3$ )  $\delta$  165.9, 159.529, 158.7, 145.4, 139.7, 136.9, 130.0, 129.1, 128.9, 128.5, 127.3, 126.2, 126.0, 122.7, 120.1, 110.8, 107.4, 83.9, 73.8, 61.7, 56.7, 56.1, 52.2, 50.0, 42.3, 39.7, 39.5, 38.3, 37.0, 36.6, 36.2, 35.8, 31.9, 31.9, 28.2, 28.0, 28.0, 27.1, 24.3, 23.8, 22.8, 22.5, 21.0, 19.3, 18.7, 14.6, 11.8. HRMS (ESI): Calcd. for  $\text{C}_{50}\text{H}_{64}\text{N}_3\text{O}_5$  [M-H] $^-$ : 786.4851; found: 786.4847.

## Crystallographic data of compound C<sub>11</sub>

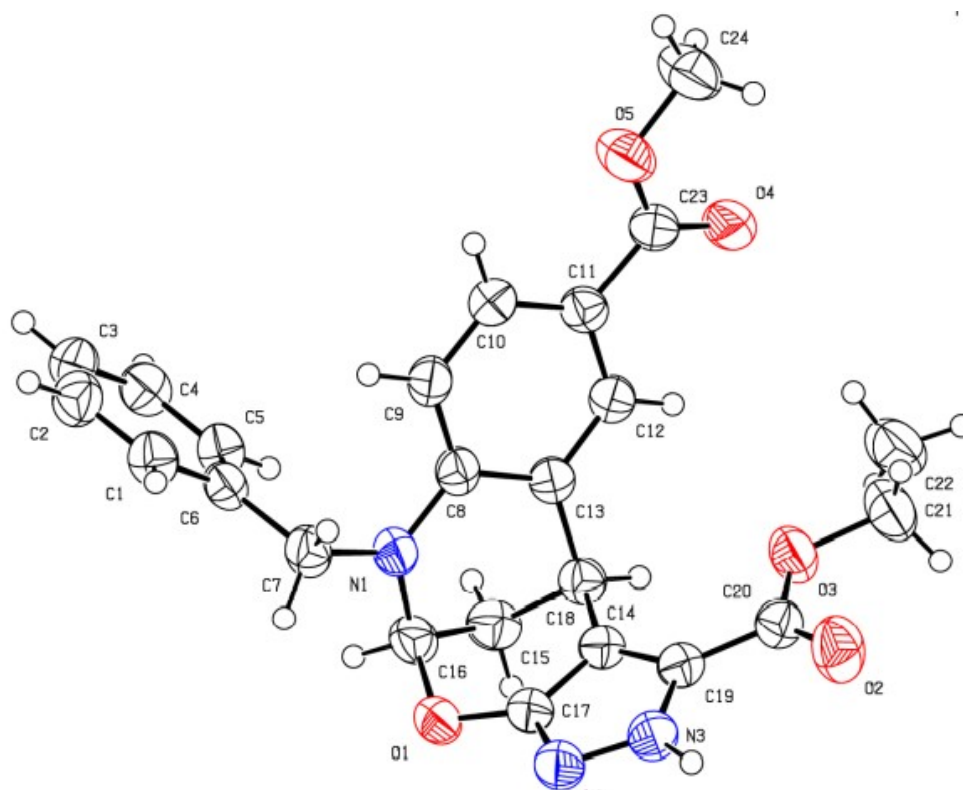

### Crystal data and structure refinement for C<sub>11</sub>(CCDC 2099592).

|                                  |                                                               |
|----------------------------------|---------------------------------------------------------------|
| Identification code              | WRJ-210125WYM                                                 |
| Empirical formula                | C <sub>24</sub> H <sub>23</sub> N <sub>3</sub> O <sub>5</sub> |
| Formula weight                   | 433.45                                                        |
| Temperature/K                    | 299(1)                                                        |
| Crystal system                   | monoclinic                                                    |
| Space group                      | C2/c                                                          |
| a/Å                              | 19.1728(5)                                                    |
| b/Å                              | 12.7276(3)                                                    |
| c/Å                              | 19.2357(6)                                                    |
| $\alpha$ /°                      | 90.00                                                         |
| $\beta$ /°                       | 117.121(4)                                                    |
| $\gamma$ /°                      | 90.00                                                         |
| Volume/Å <sup>3</sup>            | 4177.8(2)                                                     |
| Z                                | 8                                                             |
| $\rho_{\text{calc}}/\text{cm}^3$ | 1.378                                                         |
| $\mu/\text{mm}^{-1}$             | 0.806                                                         |
| F(000)                           | 1824.0                                                        |
| Crystal size/mm <sup>3</sup>     | 0.25 × 0.15 × 0.13                                            |
| Radiation                        | CuK $\alpha$ ( $\lambda$ = 1.54184)                           |

$2\Theta$  range for data collection/ $^{\circ}$  8.66 to 155.56  
 Index ranges  $-23 \leq h \leq 23, -15 \leq k \leq 15, -23 \leq l \leq 18$   
 Reflections collected 13079  
 Independent reflections 4302 [ $R_{\text{int}} = 0.0156, R_{\text{sigma}} = 0.0179$ ]  
 Data/restraints/parameters 4302/0/295  
 Goodness-of-fit on  $F^2$  1.061  
 Final R indexes [ $I > 2\sigma(I)$ ]  $R_1 = 0.0447, wR_2 = 0.1203$   
 Final R indexes [all data]  $R_1 = 0.0521, wR_2 = 0.1249$   
 Largest diff. peak/hole /  $e \text{ \AA}^{-3}$  0.37/-0.25

### Crystal structure determination of [WRJ-210125WYM] ( $C_{11}$ )

**Crystal Data** for  $C_{24}H_{23}N_3O_5$  ( $M = 433.45$  g/mol): monoclinic, space group C2/c (no. 15),  $a = 19.1728(5)$   $\text{\AA}$ ,  $b = 12.7276(3)$   $\text{\AA}$ ,  $c = 19.2357(6)$   $\text{\AA}$ ,  $\beta = 117.121(4)^{\circ}$ ,  $V = 4177.8(2)$   $\text{\AA}^3$ ,  $Z = 8$ ,  $T = 299(1)$  K,  $\mu(\text{CuK}\alpha) = 0.806$   $\text{mm}^{-1}$ ,  $D_{\text{calc}} = 1.378$   $\text{g/cm}^3$ , 13079 reflections measured ( $8.66^{\circ} \leq 2\Theta \leq 155.56^{\circ}$ ), 4302 unique ( $R_{\text{int}} = 0.0156, R_{\text{sigma}} = 0.0179$ ) which were used in all calculations. The final  $R_1$  was 0.0447 ( $> 2\sigma(I)$ ) and  $wR_2$  was 0.1249 (all data).

### Refinement model description

**Table 2 Fractional Atomic Coordinates ( $\times 10^4$ ) and Equivalent Isotropic Displacement Parameters ( $\text{\AA}^2 \times 10^3$ ) for WRJ-210125WYM.  $U_{\text{eq}}$  is defined as 1/3 of the trace of the orthogonalised  $U_{ij}$  tensor.**

| Atom | x          | y           | z          | U(eq)   |
|------|------------|-------------|------------|---------|
| O1   | 5456.4(8)  | 6261.6(9)   | 338.1(7)   | 53.7(3) |
| O2   | 6316.4(9)  | 10680.7(11) | 434.4(9)   | 72.2(4) |
| O3   | 5788.6(8)  | 10304.3(9)  | 1230.5(8)  | 59.1(3) |
| O4   | 6535.6(8)  | 10119.2(10) | 3907.5(7)  | 63.2(4) |
| O5   | 7620.4(8)  | 9171.2(11)  | 4579.3(8)  | 66.7(4) |
| N1   | 6019.0(8)  | 6072.5(10)  | 1719.9(8)  | 47.8(3) |
| N2   | 5994.1(9)  | 7527.7(11)  | -149.3(8)  | 52.6(3) |
| N3   | 6119.3(9)  | 8571.9(12)  | -29.3(8)   | 50.6(3) |
| C1   | 7198.1(10) | 3680.6(13)  | 2736.7(11) | 51.2(4) |
| C2   | 7266.8(11) | 2957.5(14)  | 3301.4(11) | 56.1(4) |
| C3   | 6723.0(11) | 2941.2(14)  | 3581.9(11) | 55.0(4) |
| C4   | 6106.6(10) | 3636.7(14)  | 3292.7(10) | 51.7(4) |
| C5   | 6033.5(10) | 4354.5(13)  | 2721.1(10) | 47.1(4) |
| C6   | 6581.4(9)  | 4384.6(11)  | 2439.4(9)  | 42.7(3) |
| C7   | 6531.3(11) | 5172.9(13)  | 1827.0(10) | 51.0(4) |
| C8   | 6246.0(9)  | 6862.5(11)  | 2281.4(9)  | 41.5(3) |
| C9   | 6874.3(9)  | 6724.4(12)  | 3026.0(10) | 45.7(4) |
| C10  | 7092.7(10) | 7515.5(13)  | 3576.3(10) | 46.5(4) |

**Table 2 Fractional Atomic Coordinates ( $\times 10^4$ ) and Equivalent Isotropic Displacement Parameters ( $\text{\AA}^2 \times 10^3$ ) for WRJ-210125WYM.  $U_{\text{eq}}$  is defined as 1/3 of the trace of the orthogonalised  $U_{ij}$  tensor.**

| Atom | x          | y           | z          | U(eq)   |
|------|------------|-------------|------------|---------|
| C11  | 6679.2(9)  | 8460.3(12)  | 3409.2(9)  | 42.8(3) |
| C12  | 6052.7(9)  | 8601.3(12)  | 2668.6(9)  | 41.8(3) |
| C13  | 5844.6(9)  | 7835.4(12)  | 2099.1(9)  | 40.0(3) |
| C14  | 5217.8(9)  | 7987.2(12)  | 1268.8(9)  | 42.8(3) |
| C15  | 4751.3(10) | 6955.9(14)  | 1025.5(11) | 52.6(4) |
| C16  | 5296.8(10) | 6107.8(13)  | 1004.6(10) | 50.2(4) |
| C17  | 5671.5(10) | 7273.5(12)  | 308.2(9)   | 45.2(3) |
| C18  | 5580.1(9)  | 8121.9(12)  | 723.6(9)   | 41.6(3) |
| C19  | 5888.0(9)  | 8955.4(13)  | 488.9(9)   | 43.8(3) |
| C20  | 6025.8(10) | 10069.8(13) | 704.8(10)  | 48.1(4) |
| C21  | 5865.1(14) | 11406.8(15) | 1465.6(14) | 69.4(5) |
| C22  | 5460.3(15) | 11526.8(19) | 1948.2(14) | 81.7(7) |
| C23  | 6916.3(10) | 9333.6(13)  | 3978.1(9)  | 46.9(4) |
| C24  | 7925.1(13) | 9985.3(18)  | 5161.2(13) | 74.3(6) |

**Table 3 Anisotropic Displacement Parameters ( $\text{\AA}^2 \times 10^3$ ) for WRJ-210125WYM. The Anisotropic displacement factor exponent takes the form:  $-2\pi^2[h^2a^2U_{11}+2hka^*b^*U_{12}+\dots]$ .**

| Atom | $U_{11}$ | $U_{22}$ | $U_{33}$ | $U_{23}$ | $U_{13}$ | $U_{12}$ |
|------|----------|----------|----------|----------|----------|----------|
| O1   | 76.8(8)  | 42.1(6)  | 46.6(6)  | -6.3(5)  | 31.9(6)  | -6.4(5)  |
| O2   | 88.4(10) | 52.6(8)  | 91.6(11) | -0.9(7)  | 55.0(9)  | -12.7(7) |
| O3   | 74.7(8)  | 43.2(6)  | 66.3(8)  | -9.0(6)  | 38.2(7)  | -2.4(6)  |
| O4   | 79.1(9)  | 56.0(7)  | 50.3(7)  | -6.9(6)  | 25.9(6)  | 15.3(6)  |
| O5   | 59.3(7)  | 64.2(8)  | 60.2(8)  | -19.1(6) | 13.0(6)  | 4.9(6)   |
| N1   | 61.2(8)  | 38.3(7)  | 47.3(7)  | -1.4(6)  | 27.7(6)  | 1.2(6)   |
| N2   | 70.1(9)  | 48.9(8)  | 46.0(7)  | -2.3(6)  | 32.7(7)  | 0.9(7)   |
| N3   | 64.3(9)  | 48.9(8)  | 46.8(8)  | 1.1(6)   | 32.4(7)  | -1.7(6)  |
| C1   | 52.2(9)  | 49.5(9)  | 61.5(10) | -1.5(8)  | 34.2(8)  | 3.0(7)   |
| C2   | 55.3(10) | 50.6(9)  | 59.9(10) | 3.8(8)   | 24.1(8)  | 6.5(8)   |
| C3   | 67.0(11) | 48.0(9)  | 51.2(9)  | 3.3(7)   | 27.9(9)  | -7.7(8)  |
| C4   | 56.8(9)  | 51.5(9)  | 56.7(10) | -4.3(8)  | 34.5(8)  | -10.2(7) |
| C5   | 47.4(8)  | 42.6(8)  | 58.0(9)  | -1.9(7)  | 29.9(8)  | -1.0(6)  |
| C6   | 50.7(8)  | 36.2(7)  | 47.7(8)  | -6.0(6)  | 28.1(7)  | -3.9(6)  |
| C7   | 69.3(10) | 41.7(8)  | 55.2(10) | -1.3(7)  | 39.9(9)  | 2.2(7)   |
| C8   | 48.1(8)  | 38.3(7)  | 45.9(8)  | 1.4(6)   | 28.2(7)  | -1.0(6)  |
| C9   | 50.4(8)  | 38.9(8)  | 49.0(9)  | 3.8(6)   | 23.7(7)  | 3.1(6)   |

**Table 3 Anisotropic Displacement Parameters ( $\text{\AA}^2 \times 10^3$ ) for WRJ-210125WYM. The Anisotropic displacement factor exponent takes the form:  $-2\pi^2[h^2a^{*2}U_{11}+2hka^*b^*U_{12}+\dots]$ .**

| Atom | $U_{11}$ | $U_{22}$ | $U_{33}$ | $U_{23}$  | $U_{13}$ | $U_{12}$ |
|------|----------|----------|----------|-----------|----------|----------|
| C10  | 49.1(8)  | 46.3(8)  | 43.7(8)  | 2.7(7)    | 20.7(7)  | 0.6(7)   |
| C11  | 47.6(8)  | 44.4(8)  | 42.8(8)  | -2.1(6)   | 26.1(7)  | -1.6(6)  |
| C12  | 46.3(8)  | 42.3(8)  | 44.7(8)  | 1.5(6)    | 27.7(7)  | 4.3(6)   |
| C13  | 42.9(7)  | 41.1(8)  | 42.2(8)  | 0.3(6)    | 24.9(7)  | -0.6(6)  |
| C14  | 42.5(8)  | 44.5(8)  | 43.0(8)  | -1.3(6)   | 21.0(7)  | 1.8(6)   |
| C15  | 47.2(9)  | 58.2(10) | 52.4(9)  | -4.1(8)   | 22.8(8)  | -8.5(7)  |
| C16  | 60.7(10) | 43.8(8)  | 49.0(9)  | -5.1(7)   | 27.5(8)  | -11.9(7) |
| C17  | 55.3(9)  | 42.1(8)  | 39.1(8)  | -1.5(6)   | 22.3(7)  | 0.0(7)   |
| C18  | 44.8(8)  | 42.2(8)  | 37.0(7)  | -0.6(6)   | 17.8(6)  | 1.2(6)   |
| C19  | 47.4(8)  | 44.3(8)  | 39.1(8)  | 1.3(6)    | 19.2(7)  | 2.0(6)   |
| C20  | 48.4(8)  | 45.6(8)  | 48.8(9)  | 1.5(7)    | 20.7(7)  | 2.1(7)   |
| C21  | 77.5(13) | 48.6(10) | 78.1(14) | -16.3(9)  | 32.2(11) | -2.7(9)  |
| C22  | 89.7(16) | 70.4(14) | 72.9(14) | -20.6(11) | 26.4(12) | 13.1(12) |
| C23  | 55.0(9)  | 48.1(9)  | 42.6(8)  | -1.6(7)   | 26.5(7)  | 1.4(7)   |
| C24  | 66.6(12) | 74.5(14) | 66.7(13) | -25.3(11) | 17.3(10) | -3.2(10) |

**Table 4 Bond Lengths for WRJ-210125WYM.**

| Atom | Atom | Length/ $\text{\AA}$ | Atom | Atom | Length/ $\text{\AA}$ |
|------|------|----------------------|------|------|----------------------|
| O1   | C16  | 1.4606(19)           | C4   | C5   | 1.386(2)             |
| O1   | C17  | 1.3615(19)           | C5   | C6   | 1.385(2)             |
| O2   | C20  | 1.204(2)             | C6   | C7   | 1.517(2)             |
| O3   | C20  | 1.318(2)             | C8   | C9   | 1.400(2)             |
| O3   | C21  | 1.461(2)             | C8   | C13  | 1.415(2)             |
| O4   | C23  | 1.209(2)             | C9   | C10  | 1.380(2)             |
| O5   | C23  | 1.334(2)             | C10  | C11  | 1.395(2)             |
| O5   | C24  | 1.439(2)             | C11  | C12  | 1.394(2)             |
| N1   | C7   | 1.461(2)             | C11  | C23  | 1.479(2)             |
| N1   | C8   | 1.392(2)             | C12  | C13  | 1.382(2)             |
| N1   | C16  | 1.441(2)             | C13  | C14  | 1.511(2)             |
| N2   | N3   | 1.352(2)             | C14  | C15  | 1.536(2)             |
| N2   | C17  | 1.326(2)             | C14  | C18  | 1.509(2)             |
| N3   | C19  | 1.353(2)             | C15  | C16  | 1.516(2)             |
| C1   | C2   | 1.383(2)             | C17  | C18  | 1.401(2)             |
| C1   | C6   | 1.383(2)             | C18  | C19  | 1.386(2)             |
| C2   | C3   | 1.375(3)             | C19  | C20  | 1.468(2)             |
| C3   | C4   | 1.375(3)             | C21  | C22  | 1.464(3)             |

**Table 5 Bond Angles for WRJ-210125WYM.**

| Atom | Atom | Atom | Angle/°    | Atom | Atom | Atom | Angle/°    |
|------|------|------|------------|------|------|------|------------|
| C17  | O1   | C16  | 110.65(12) | C8   | C13  | C14  | 117.03(13) |
| C20  | O3   | C21  | 115.71(15) | C12  | C13  | C8   | 119.53(14) |
| C23  | O5   | C24  | 117.02(15) | C12  | C13  | C14  | 123.41(14) |
| C8   | N1   | C7   | 120.29(14) | C13  | C14  | C15  | 106.55(13) |
| C8   | N1   | C16  | 122.88(13) | C18  | C14  | C13  | 110.67(12) |
| C16  | N1   | C7   | 116.80(14) | C18  | C14  | C15  | 105.89(13) |
| C17  | N2   | N3   | 103.11(13) | C16  | C15  | C14  | 107.67(13) |
| N2   | N3   | C19  | 112.84(14) | O1   | C16  | C15  | 110.54(14) |
| C6   | C1   | C2   | 120.88(15) | N1   | C16  | O1   | 110.35(13) |
| C3   | C2   | C1   | 120.02(17) | N1   | C16  | C15  | 111.79(14) |
| C4   | C3   | C2   | 119.80(16) | O1   | C17  | C18  | 125.87(14) |
| C3   | C4   | C5   | 120.17(15) | N2   | C17  | O1   | 120.05(14) |
| C6   | C5   | C4   | 120.53(16) | N2   | C17  | C18  | 114.08(14) |
| C1   | C6   | C5   | 118.59(15) | C17  | C18  | C14  | 121.73(14) |
| C1   | C6   | C7   | 119.30(14) | C19  | C18  | C14  | 135.47(14) |
| C5   | C6   | C7   | 122.10(15) | C19  | C18  | C17  | 102.81(13) |
| N1   | C7   | C6   | 115.38(13) | N3   | C19  | C18  | 107.16(14) |
| N1   | C8   | C9   | 121.46(14) | N3   | C19  | C20  | 118.68(14) |
| N1   | C8   | C13  | 119.82(14) | C18  | C19  | C20  | 134.11(15) |
| C9   | C8   | C13  | 118.71(14) | O2   | C20  | O3   | 125.07(16) |
| C10  | C9   | C8   | 120.77(15) | O2   | C20  | C19  | 124.11(16) |
| C9   | C10  | C11  | 120.68(15) | O3   | C20  | C19  | 110.82(14) |
| C10  | C11  | C23  | 121.79(15) | O3   | C21  | C22  | 106.79(18) |
| C12  | C11  | C10  | 118.74(14) | O4   | C23  | O5   | 123.12(15) |
| C12  | C11  | C23  | 119.37(14) | O4   | C23  | C11  | 124.93(15) |
| C13  | C12  | C11  | 121.45(14) | O5   | C23  | C11  | 111.93(14) |

**Table 6 Hydrogen Atom Coordinates ( $\text{\AA} \times 10^4$ ) and Isotropic Displacement Parameters ( $\text{\AA}^2 \times 10^3$ ) for WRJ-210125WYM.**

| Atom | x    | y    | z    | U(eq) |
|------|------|------|------|-------|
| H1   | 7572 | 3693 | 2555 | 61    |
| H2   | 7681 | 2482 | 3491 | 67    |
| H3A  | 6772 | 2461 | 3966 | 66    |
| H4   | 5738 | 3626 | 3481 | 62    |
| H5   | 5613 | 4819 | 2525 | 57    |

**Table 6 Hydrogen Atom Coordinates ( $\text{\AA}\times 10^4$ ) and Isotropic Displacement Parameters ( $\text{\AA}^2\times 10^3$ ) for WRJ-210125WYM.**

| Atom | <i>x</i> | <i>y</i> | <i>z</i> | U(eq) |
|------|----------|----------|----------|-------|
| H7A  | 7055     | 5432     | 1968     | 61    |
| H7B  | 6349     | 4811     | 1331     | 61    |
| H9   | 7148     | 6092     | 3151     | 55    |
| H10  | 7520     | 7418     | 4063     | 56    |
| H12  | 5768     | 9224     | 2555     | 50    |
| H14  | 4877     | 8582     | 1230     | 51    |
| H15A | 4560     | 6772     | 1398     | 63    |
| H15B | 4305     | 7032     | 514      | 63    |
| H16  | 5033     | 5429     | 940      | 60    |
| H21A | 5629     | 11857    | 1010     | 83    |
| H21B | 6413     | 11595    | 1761     | 83    |
| H22A | 4944     | 11232    | 1680     | 123   |
| H22B | 5422     | 12259    | 2045     | 123   |
| H22C | 5749     | 11168    | 2436     | 123   |
| H24A | 7953     | 10633    | 4919     | 111   |
| H24B | 8440     | 9793     | 5552     | 111   |
| H24C | 7586     | 10073    | 5401     | 111   |
| H3   | 6336(12) | 8959(17) | -281(12) | 67(6) |



## NMR spectra of the obtained compounds

### $^1\text{H-NMR}$ spectrum of $\text{C}_1$

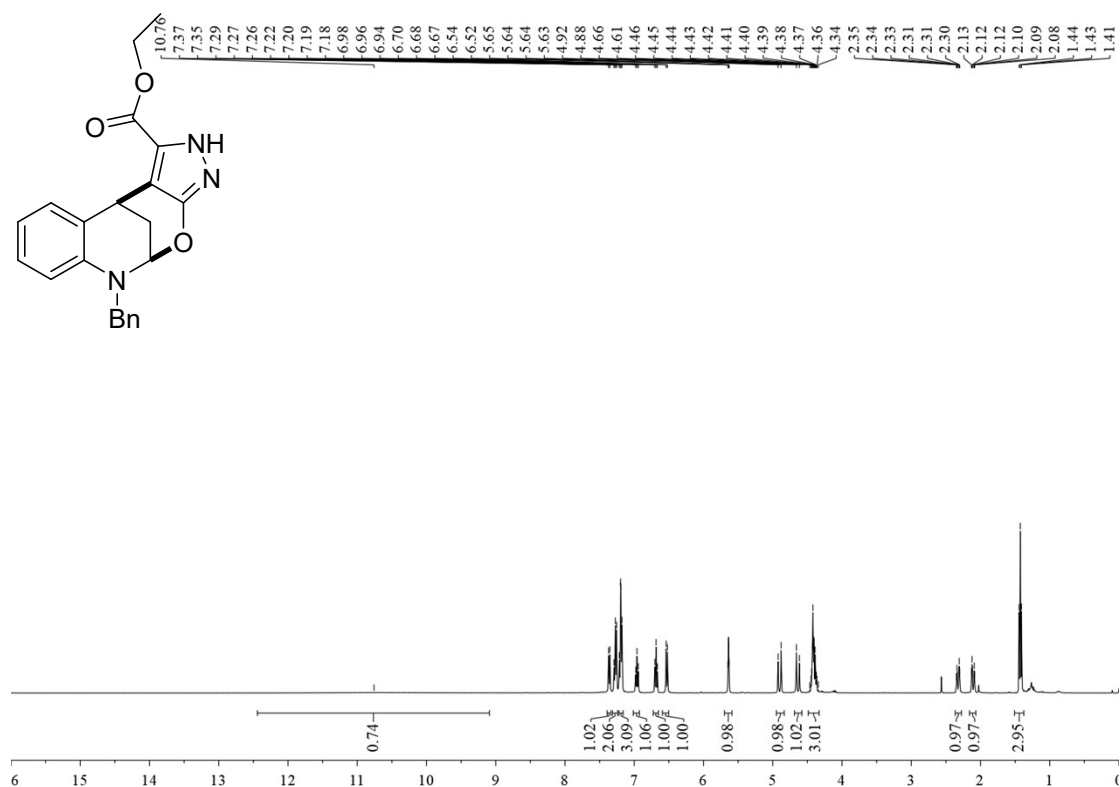

### $^{13}\text{C-NMR}$ spectrum of $\text{C}_1$

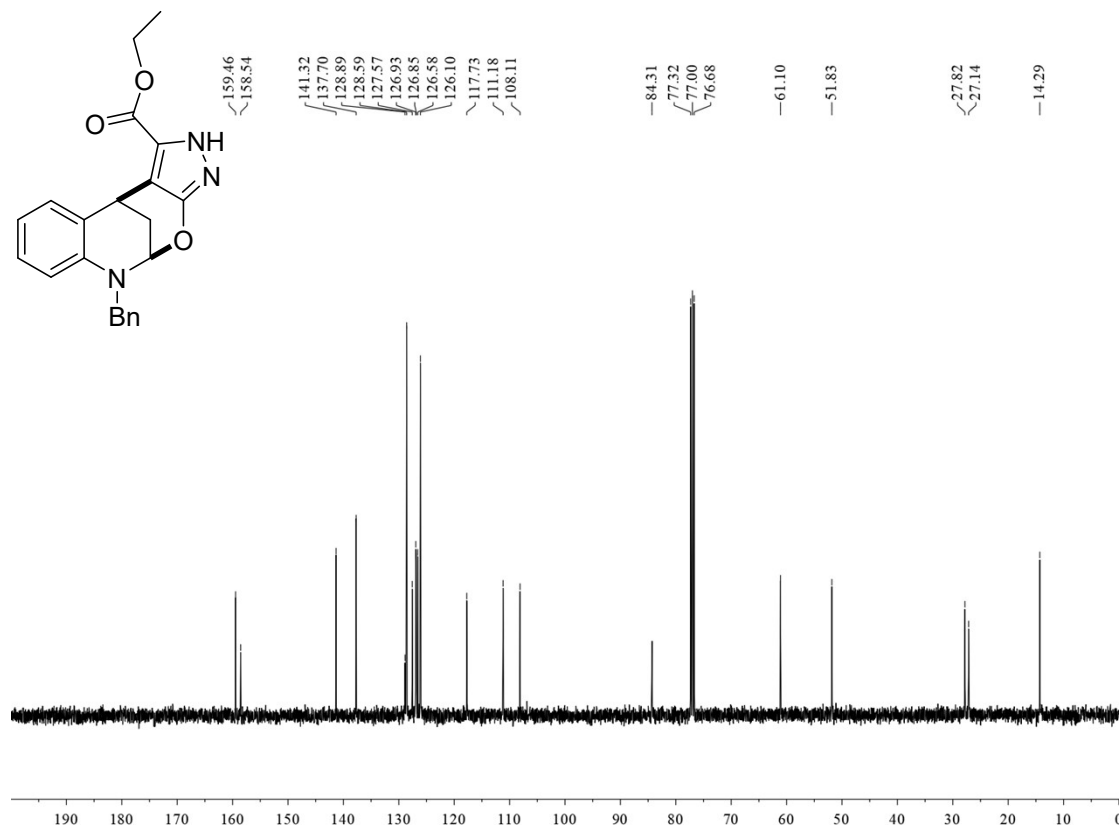

### <sup>1</sup>H-NMR spectrum of C<sub>2</sub>

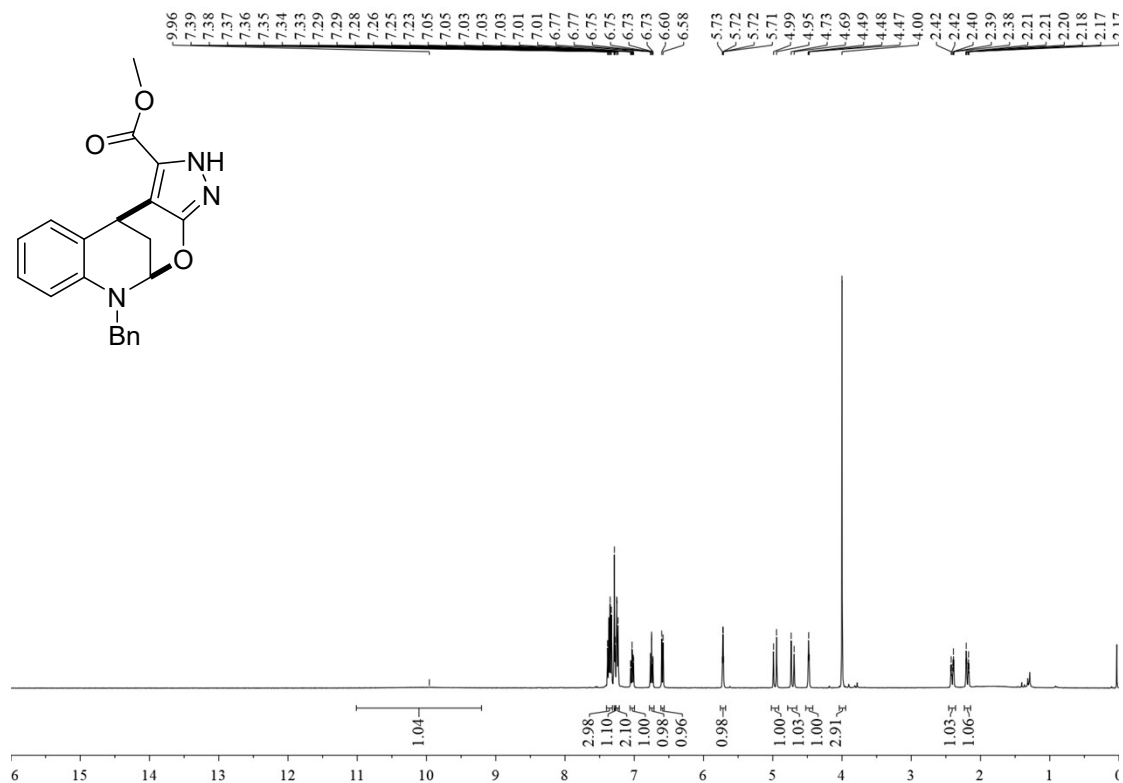

### <sup>13</sup>C-NMR spectrum of C<sub>2</sub>

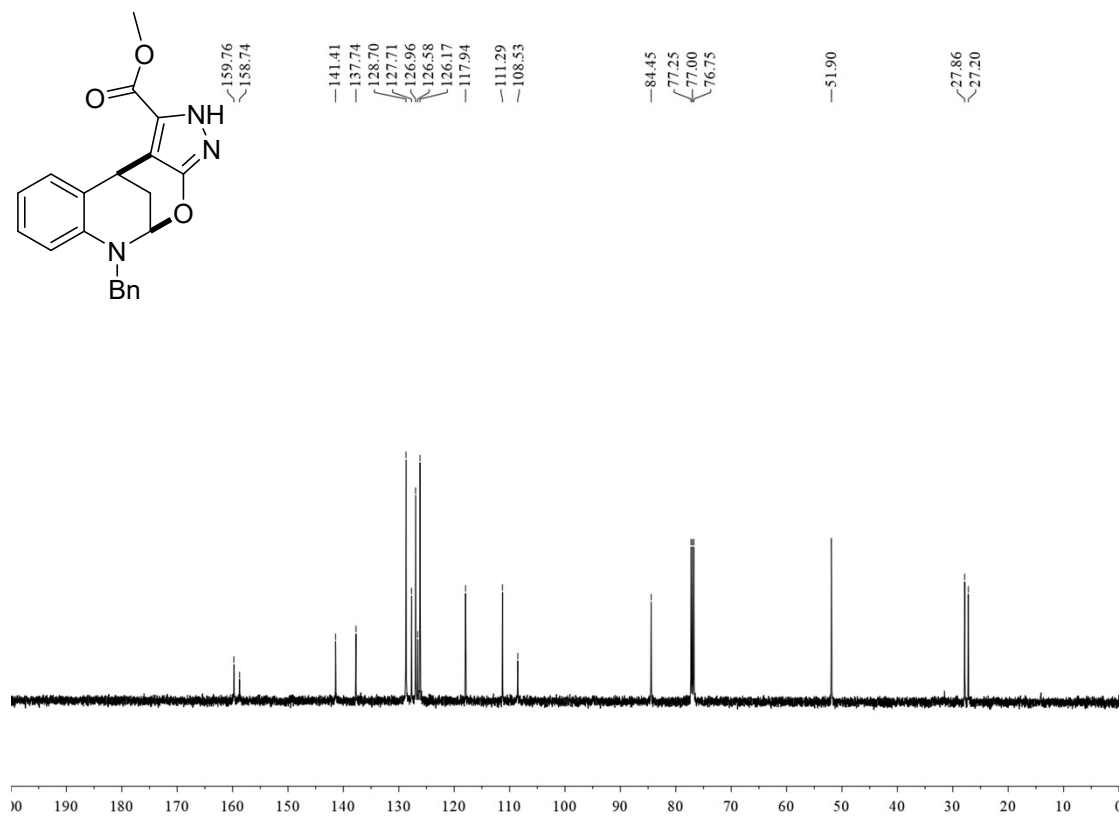

### <sup>1</sup>H-NMR spectrum of C<sub>3</sub>

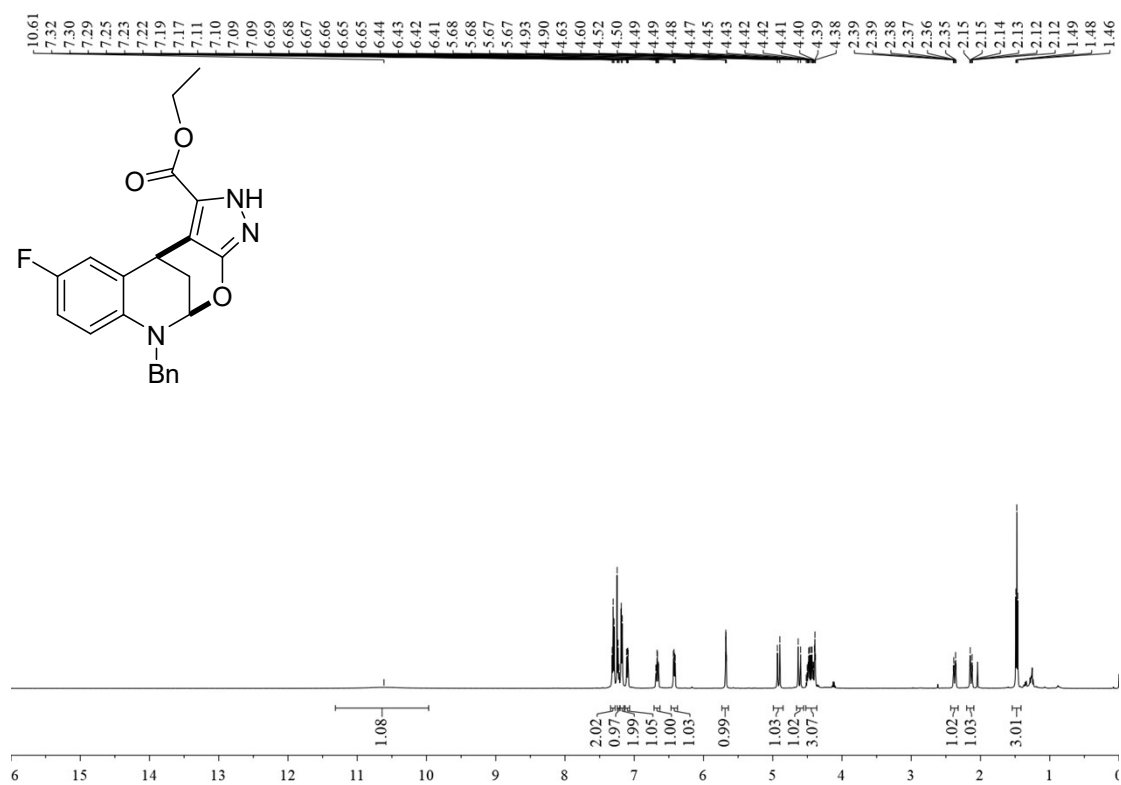

### <sup>13</sup>C-NMR spectrum of C<sub>3</sub>

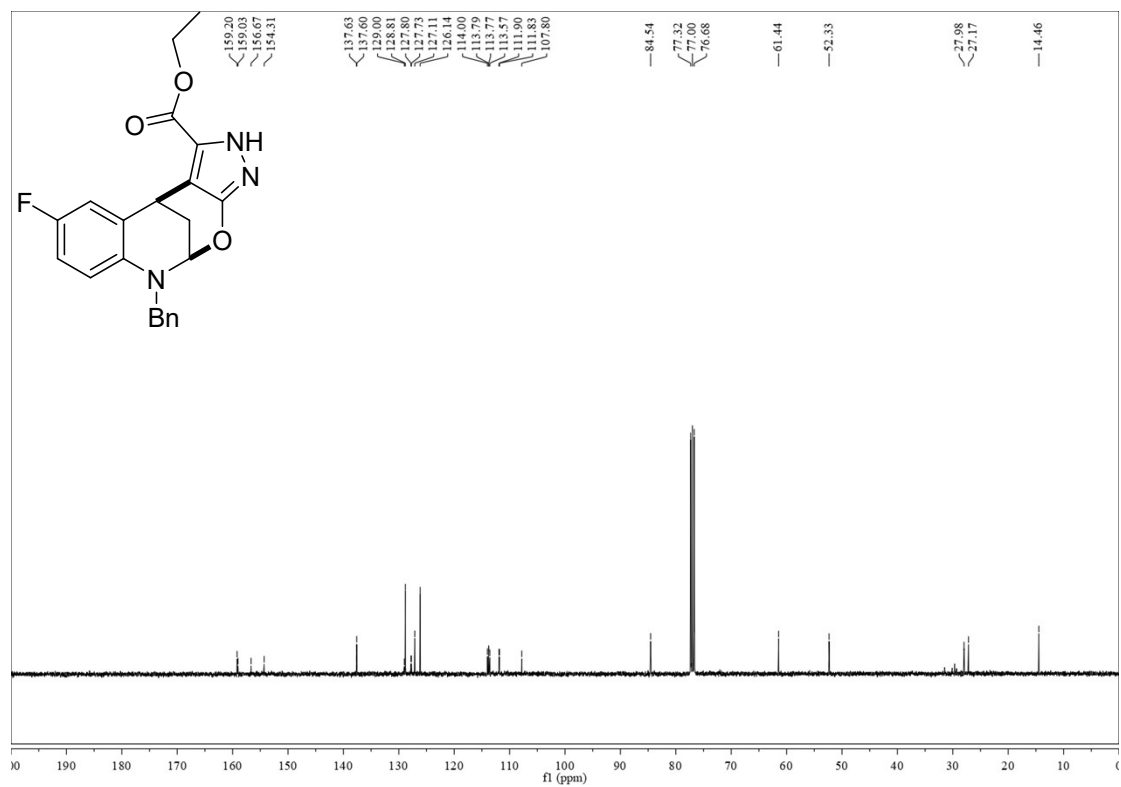

### $^{19}\text{F}$ -NMR spectrum of $\text{C}_3$

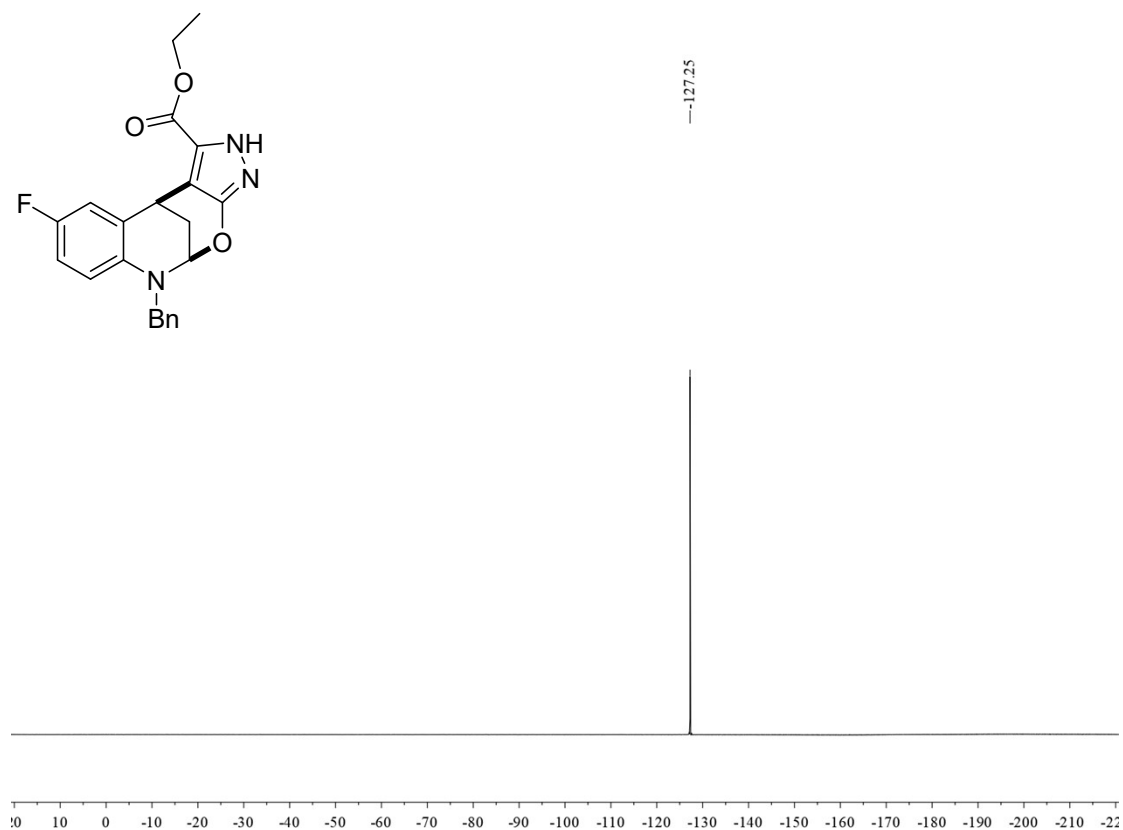

### $^1\text{H}$ -NMR spectrum of $\text{C}_4$

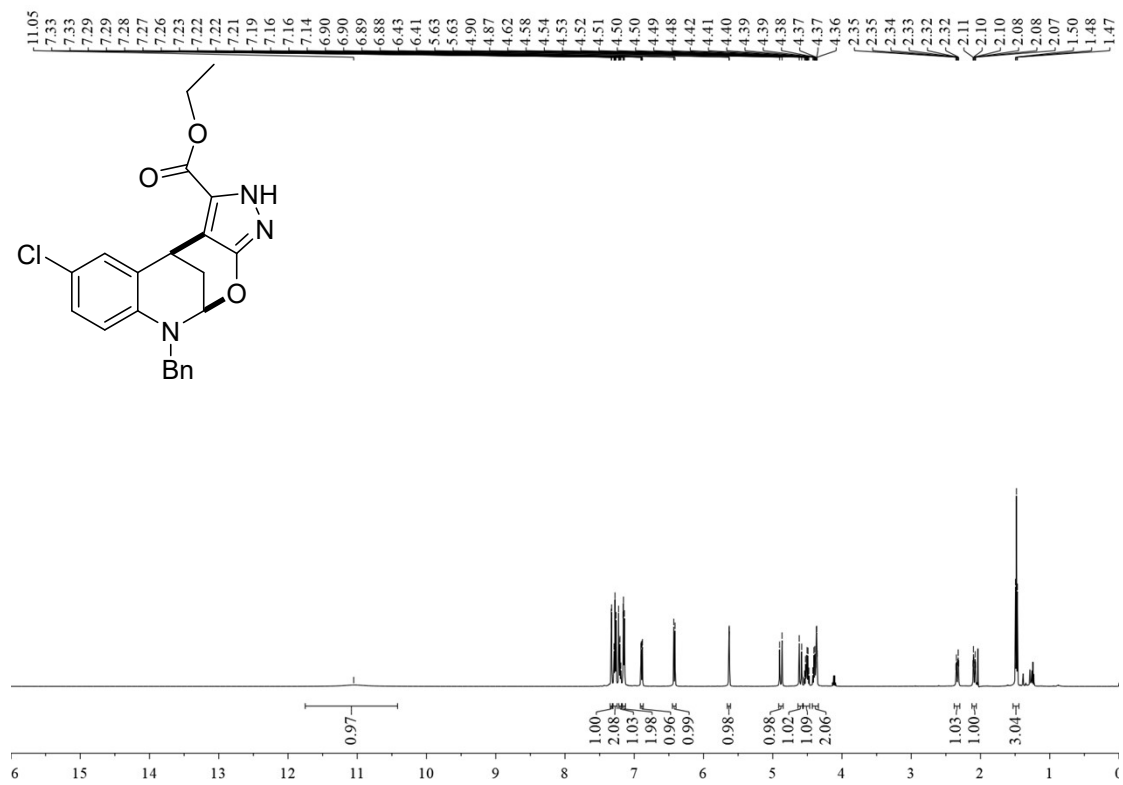

**<sup>13</sup>C-NMR spectrum of C<sub>4</sub>**

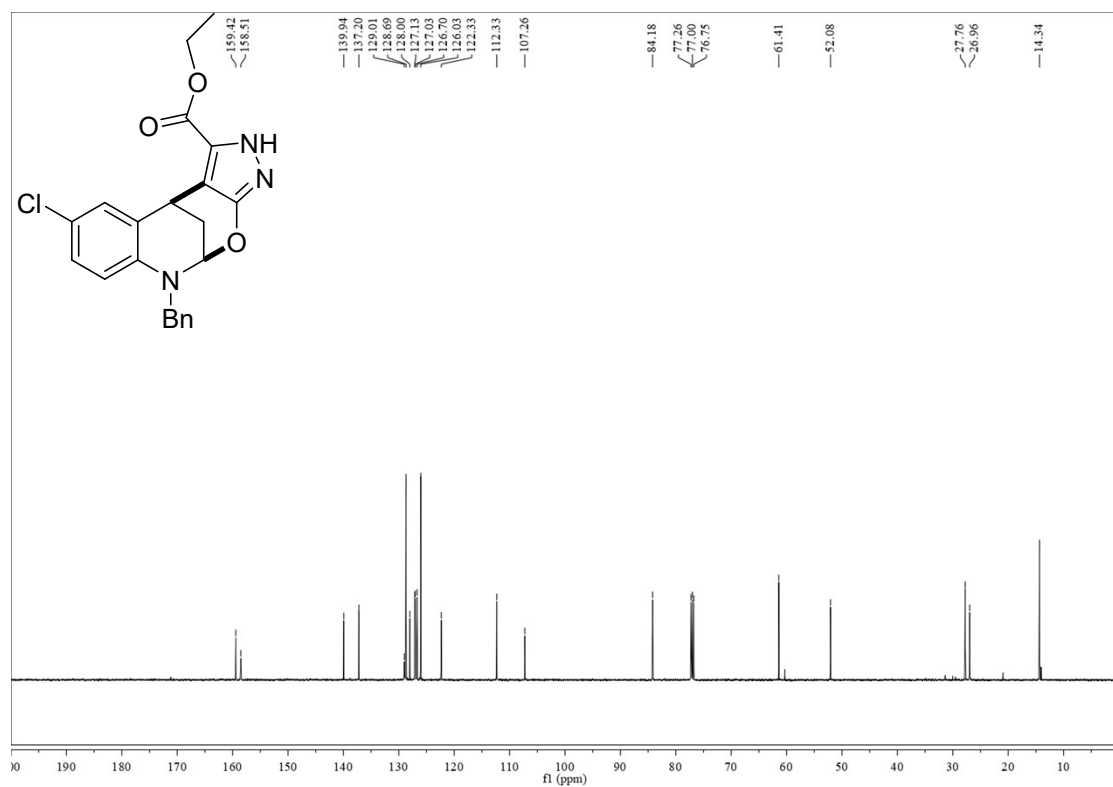

**<sup>1</sup>H-NMR spectrum of C<sub>5</sub>**

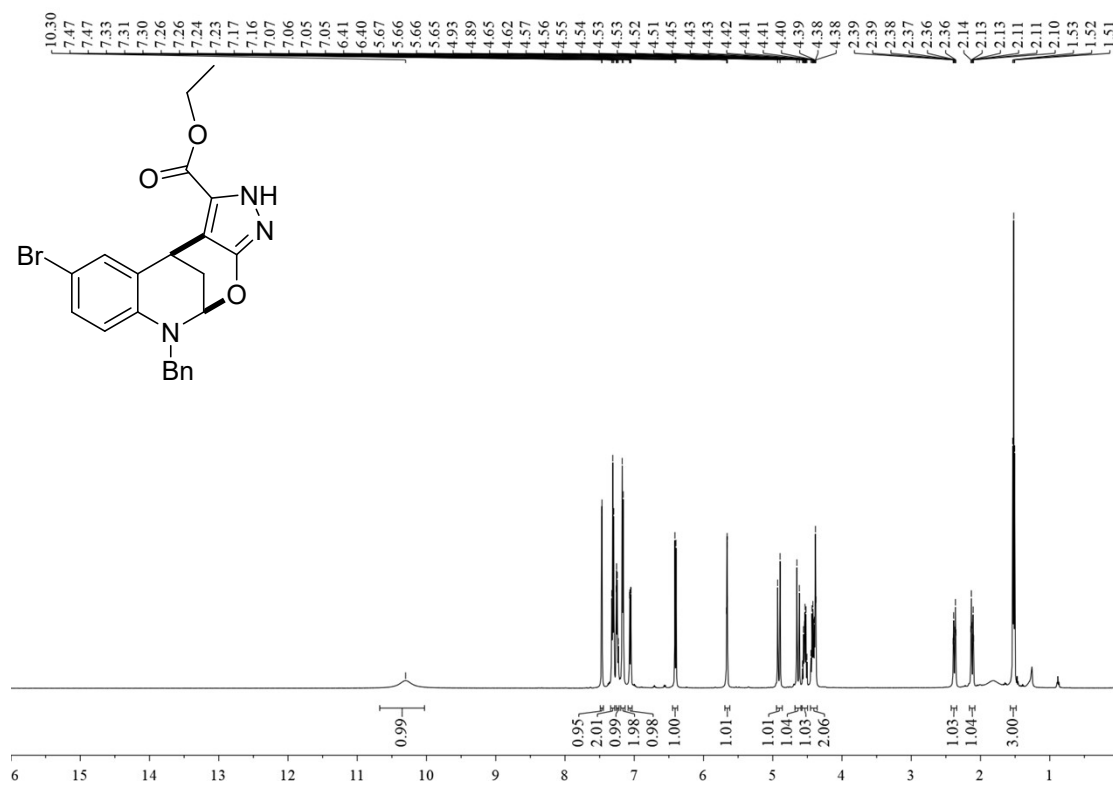

**<sup>13</sup>C-NMR spectrum of C<sub>5</sub>**

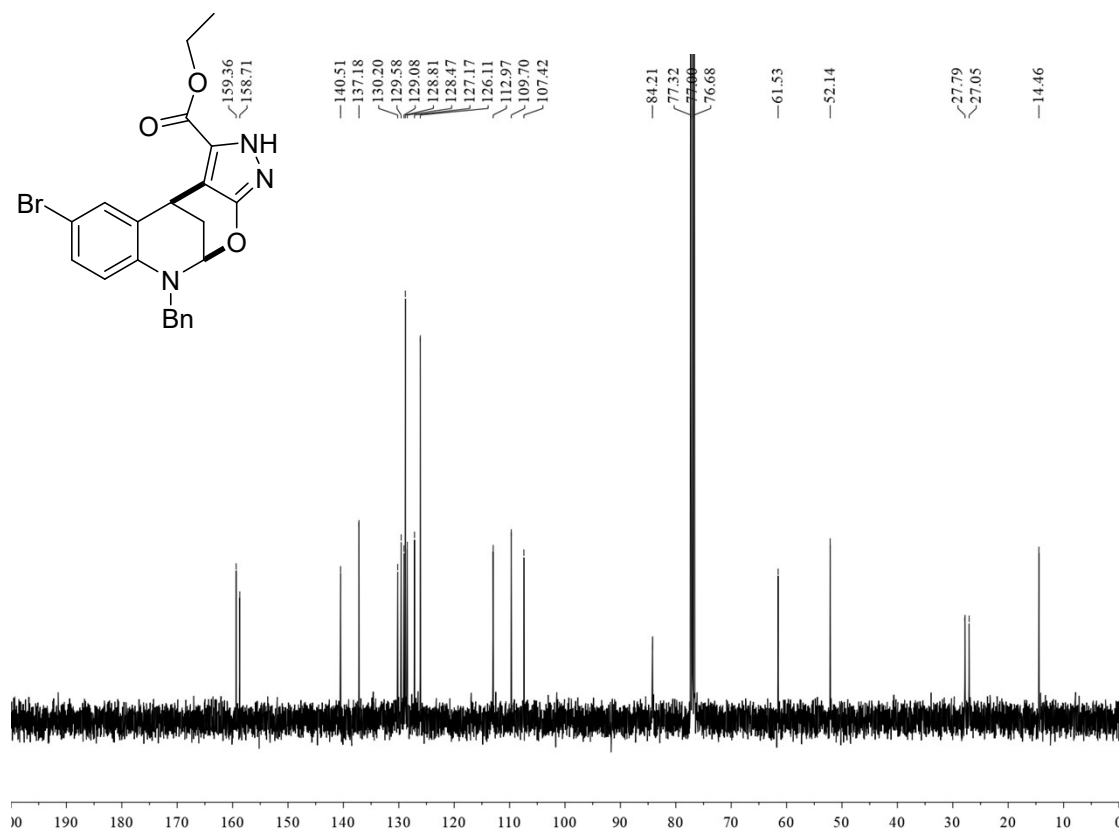

**<sup>1</sup>H-NMR spectrum of C<sub>6</sub>**

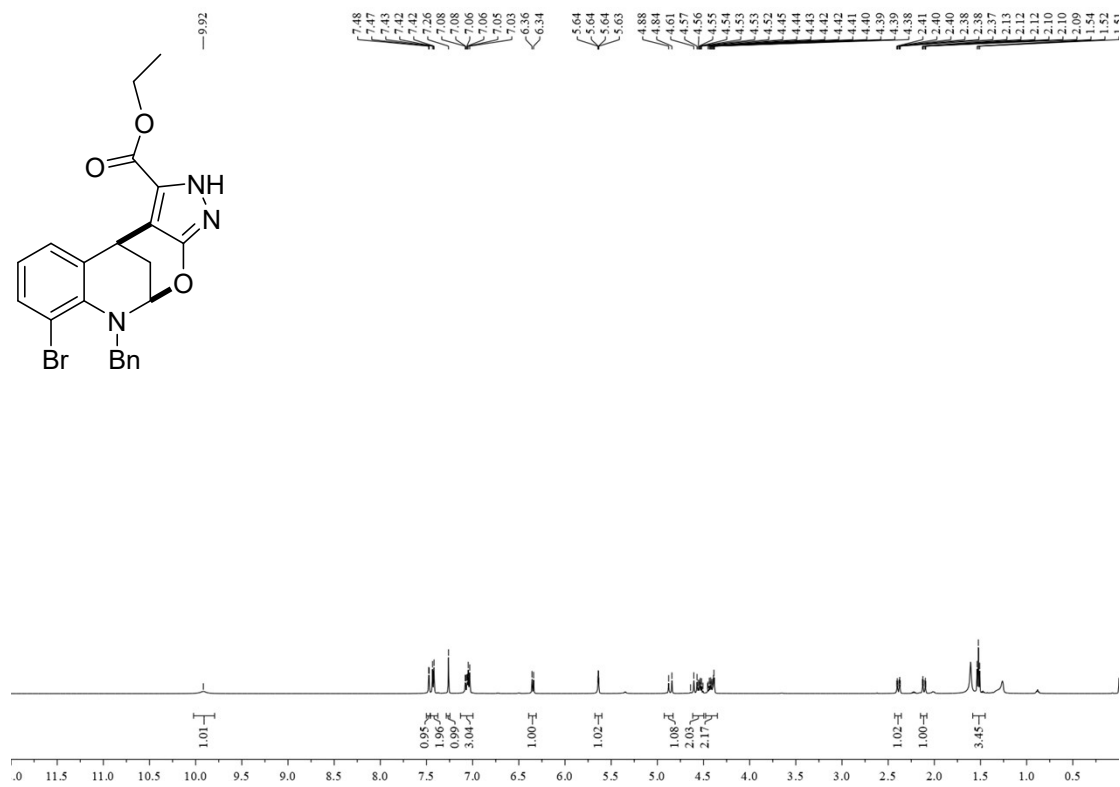

**<sup>13</sup>C-NMR spectrum of C<sub>6</sub>**

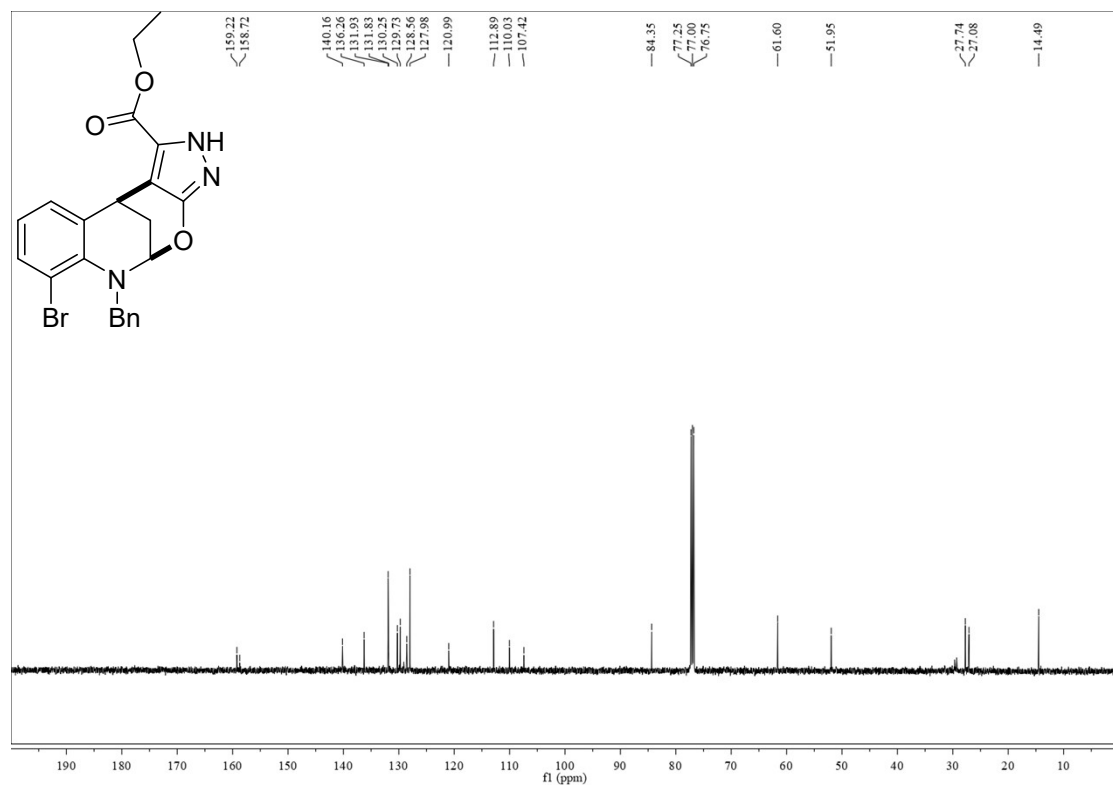

**<sup>1</sup>H-NMR spectrum of C<sub>7</sub>**

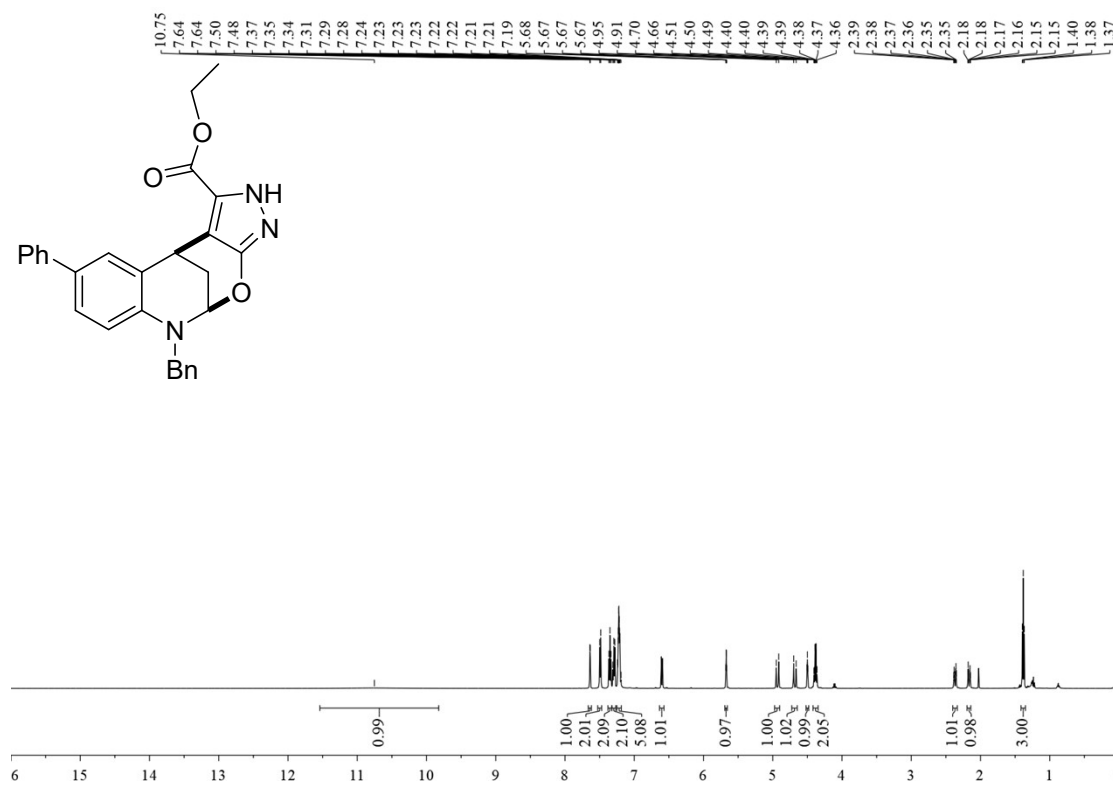

### <sup>13</sup>C-NMR spectrum of C<sub>7</sub>

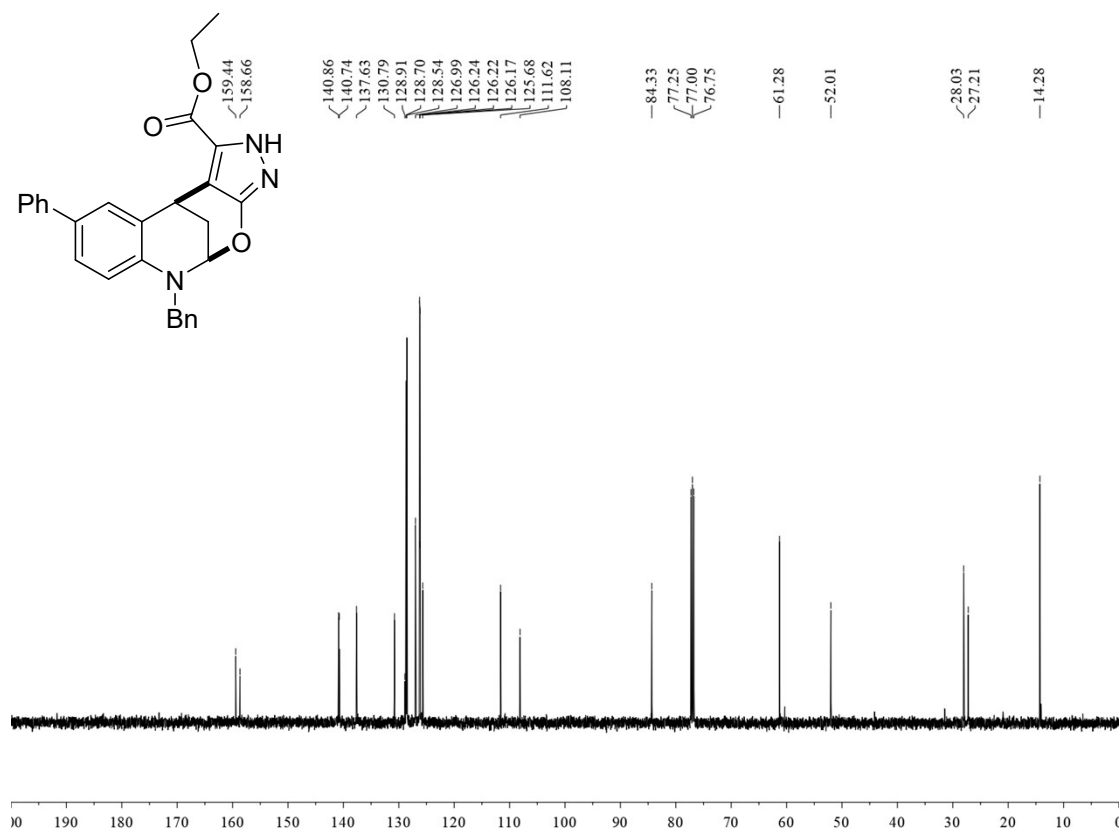

### <sup>1</sup>H-NMR spectrum of C<sub>8</sub>

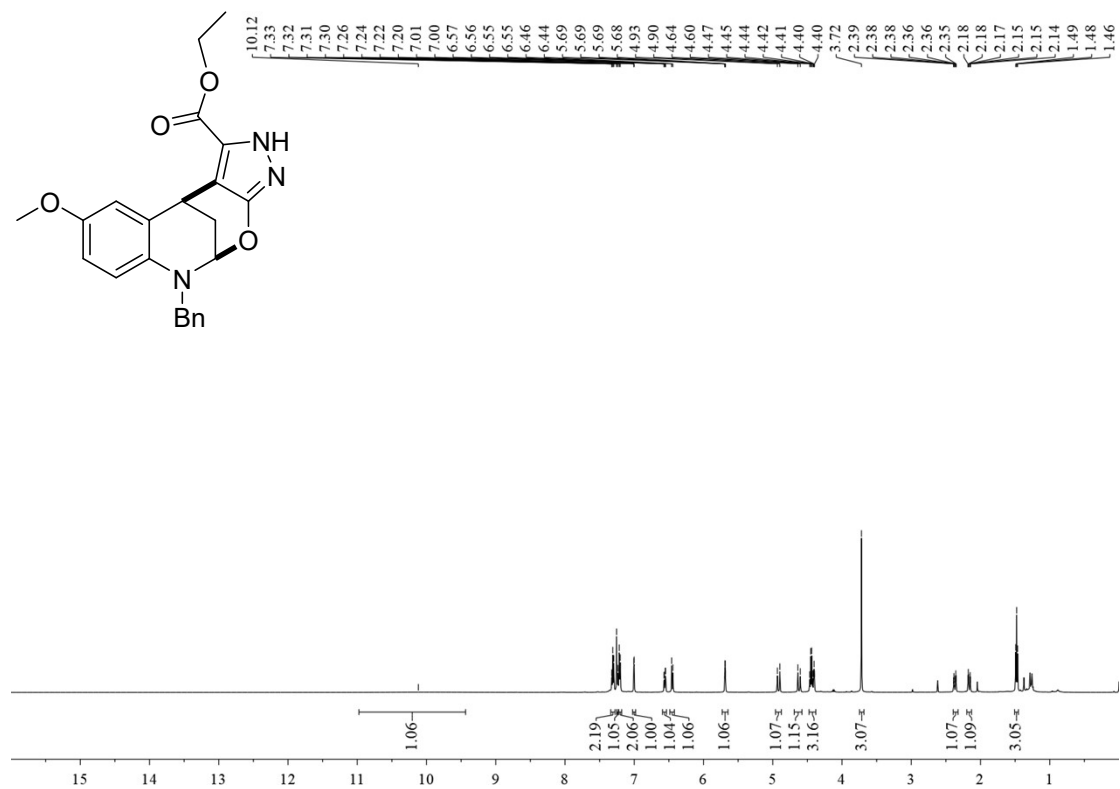



**<sup>13</sup>C-NMR spectrum of C<sub>8</sub>**

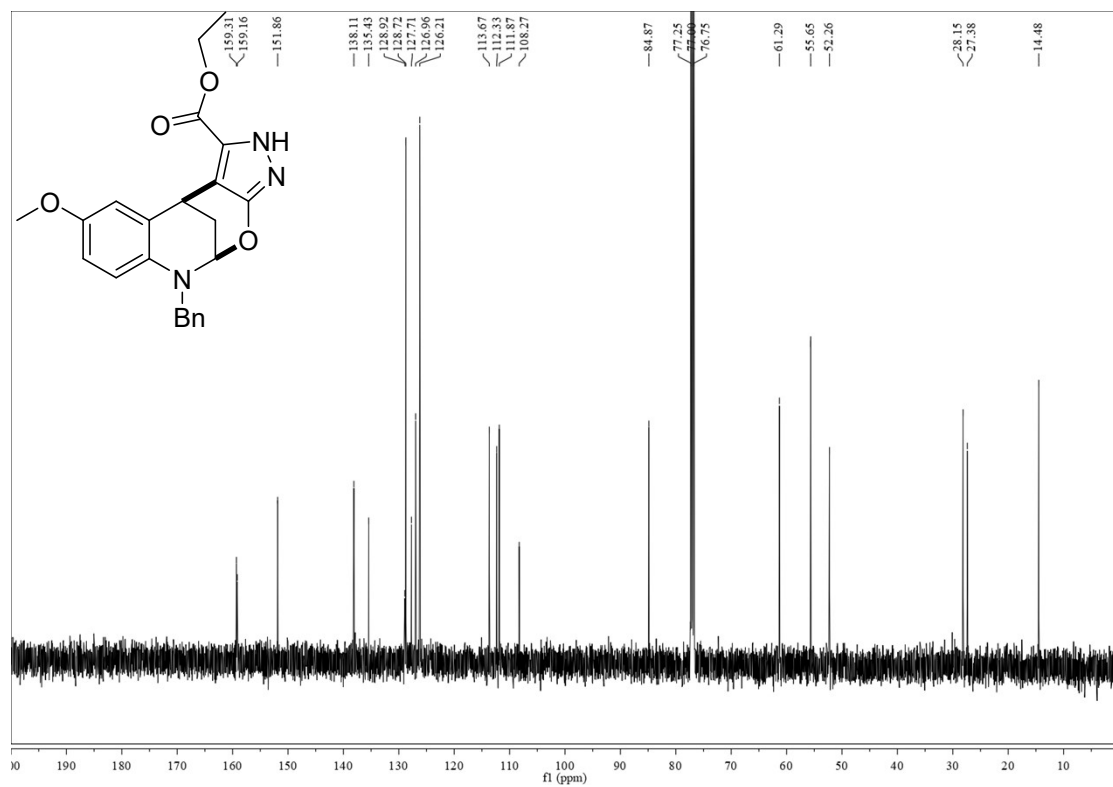

**<sup>1</sup>H-NMR spectrum of C<sub>9</sub>**

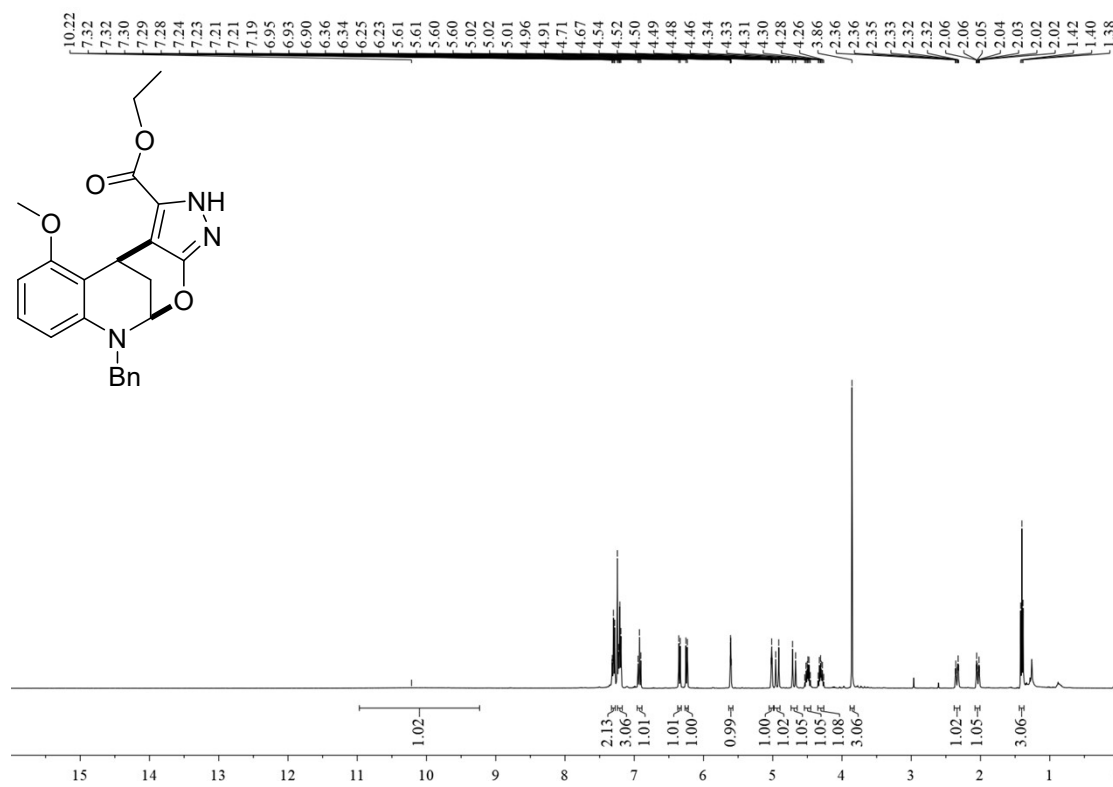

**<sup>13</sup>C-NMR spectrum of C<sub>9</sub>**

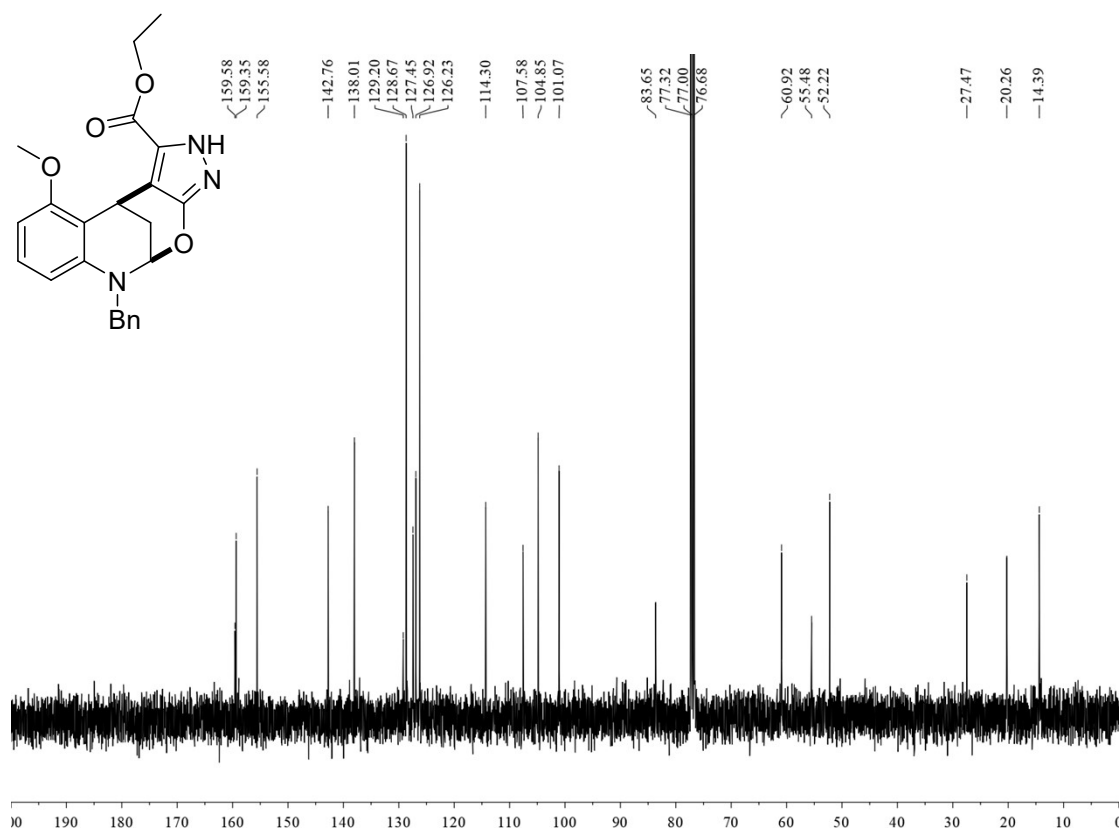

**<sup>1</sup>H-NMR spectrum of C<sub>10</sub>**

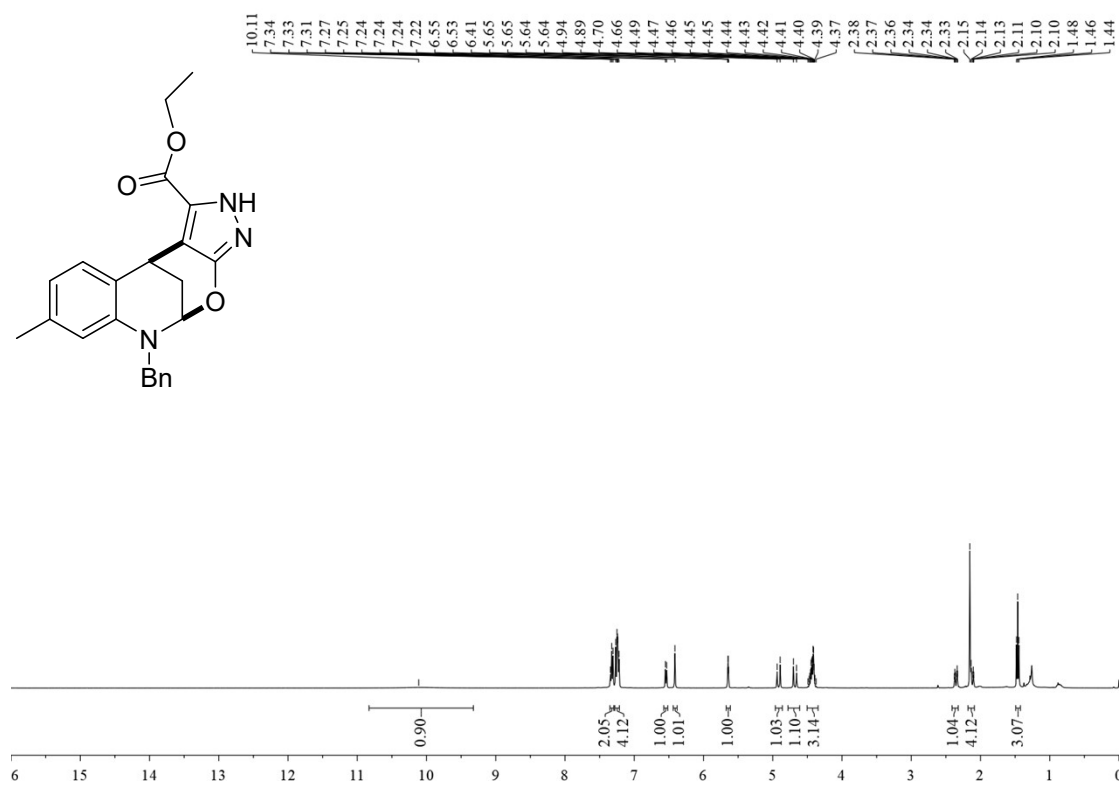

### <sup>13</sup>C-NMR spectrum of C<sub>10</sub>

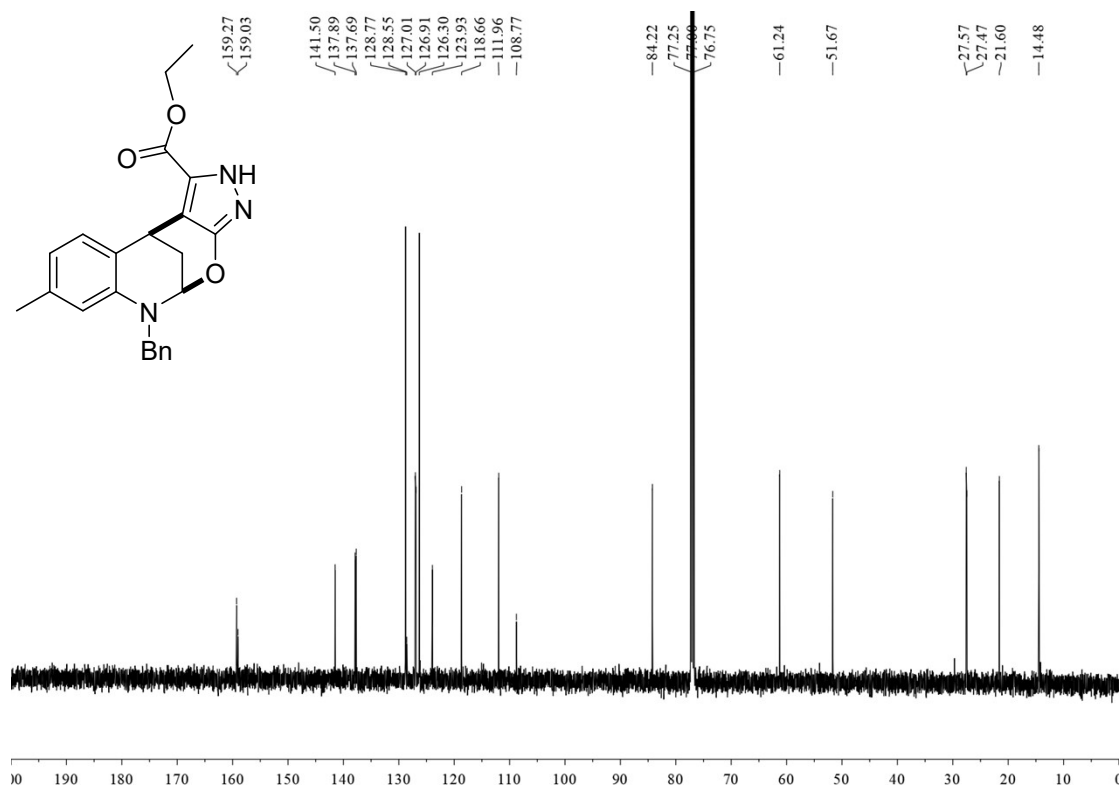

### <sup>1</sup>H-NMR spectrum of C<sub>11</sub>

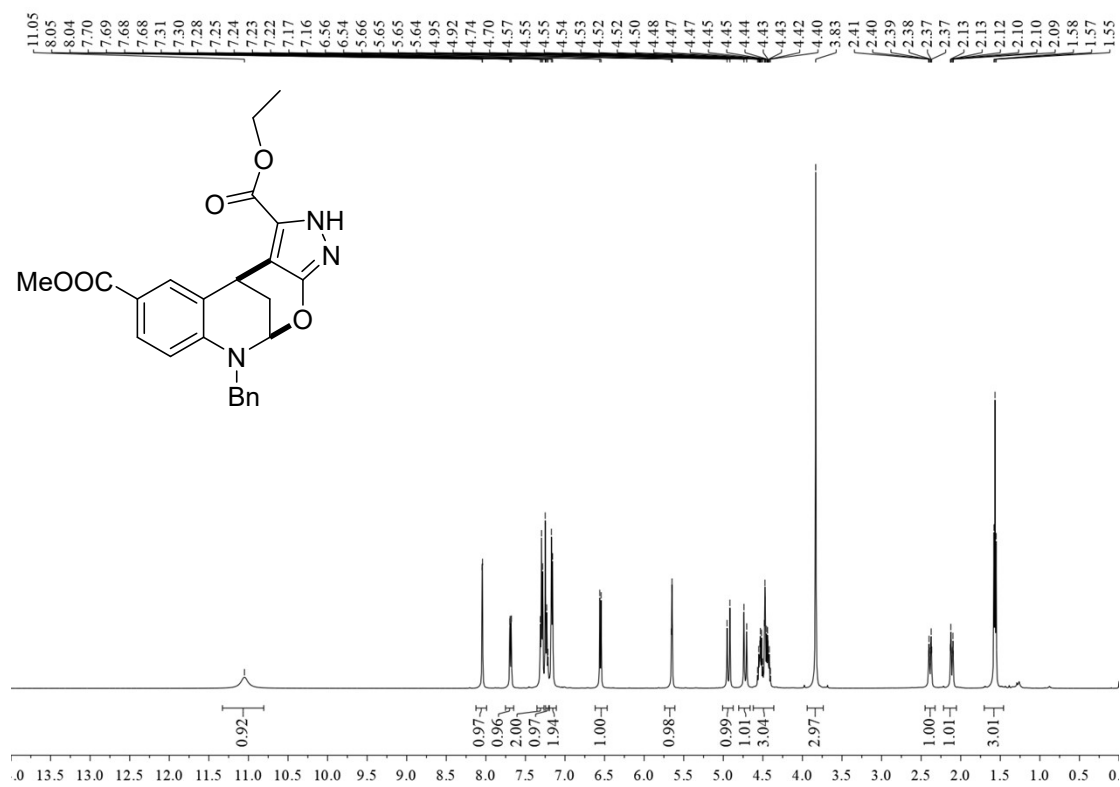

**<sup>13</sup>C-NMR spectrum of C<sub>11</sub>**

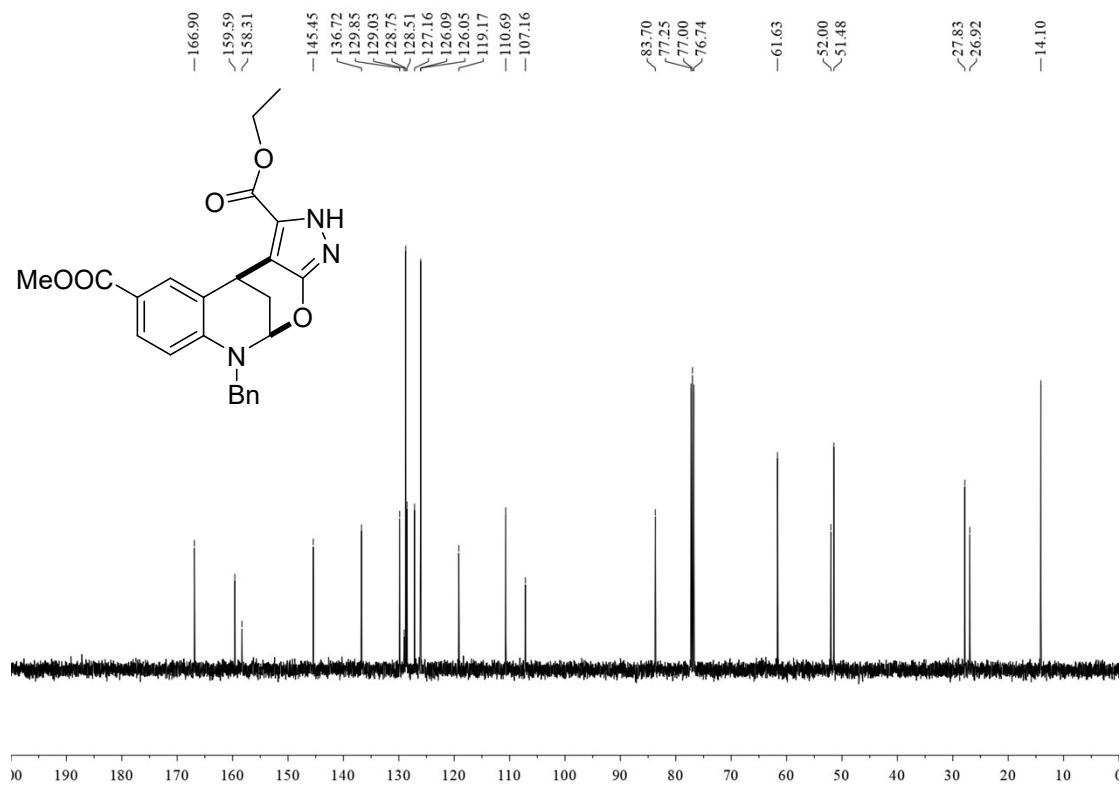

**<sup>1</sup>H-NMR spectrum of C<sub>12</sub>**

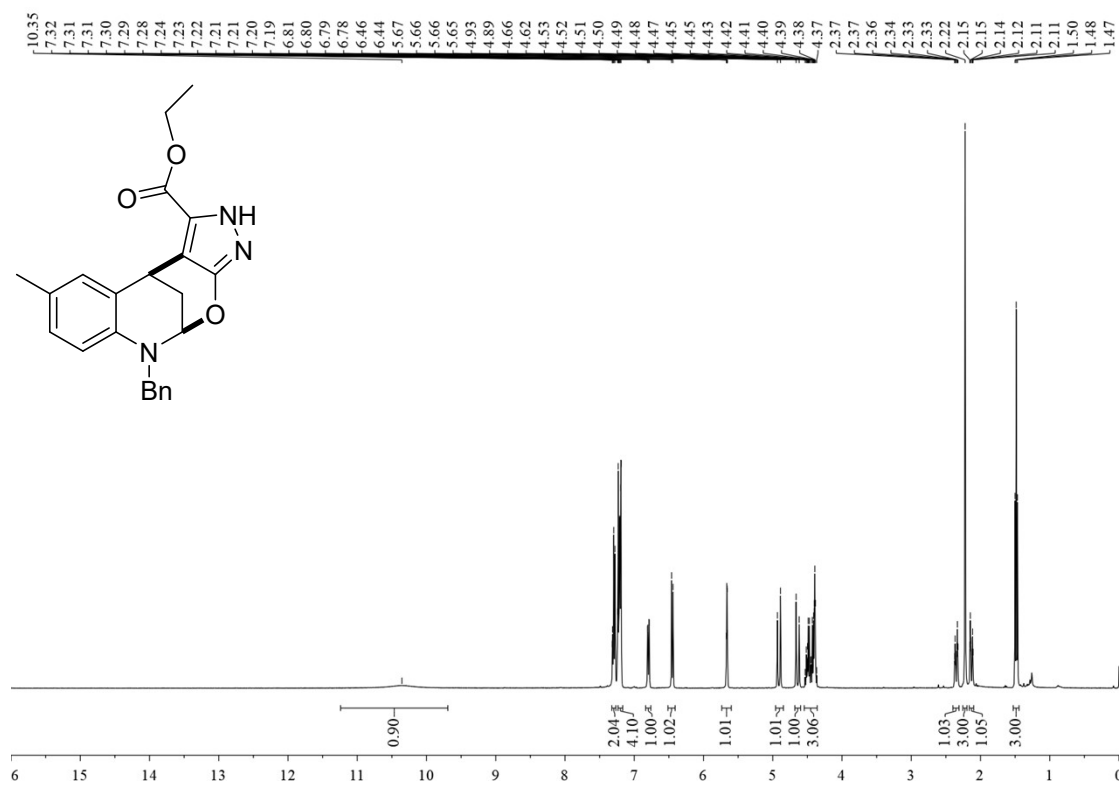

<sup>13</sup>C-NMR spectrum of C<sub>12</sub>

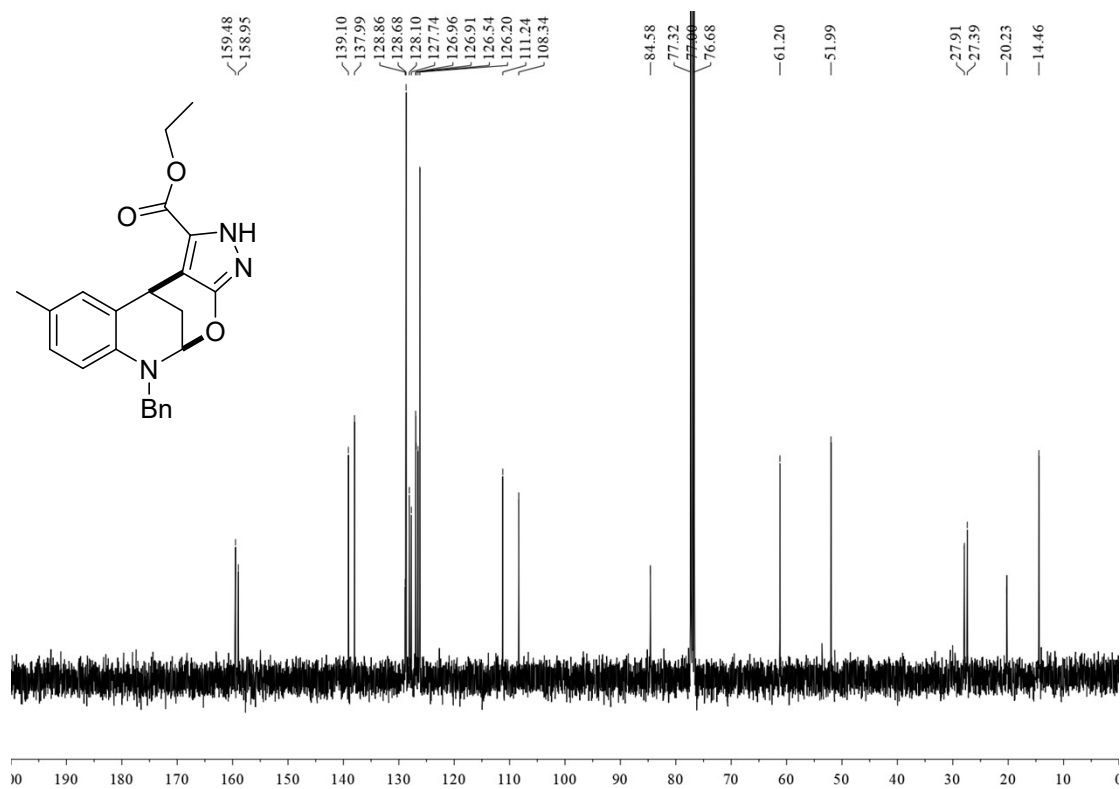

<sup>1</sup>H-NMR spectrum of C<sub>13</sub>

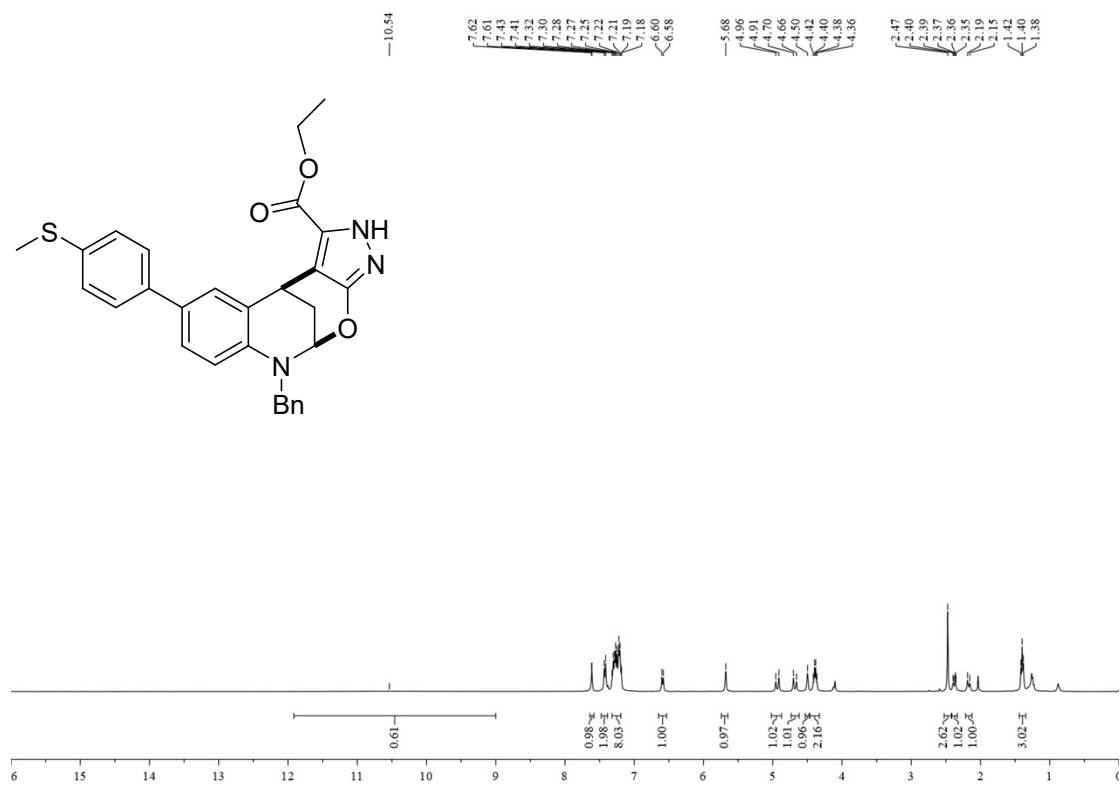

### <sup>13</sup>C-NMR spectrum of C<sub>13</sub>

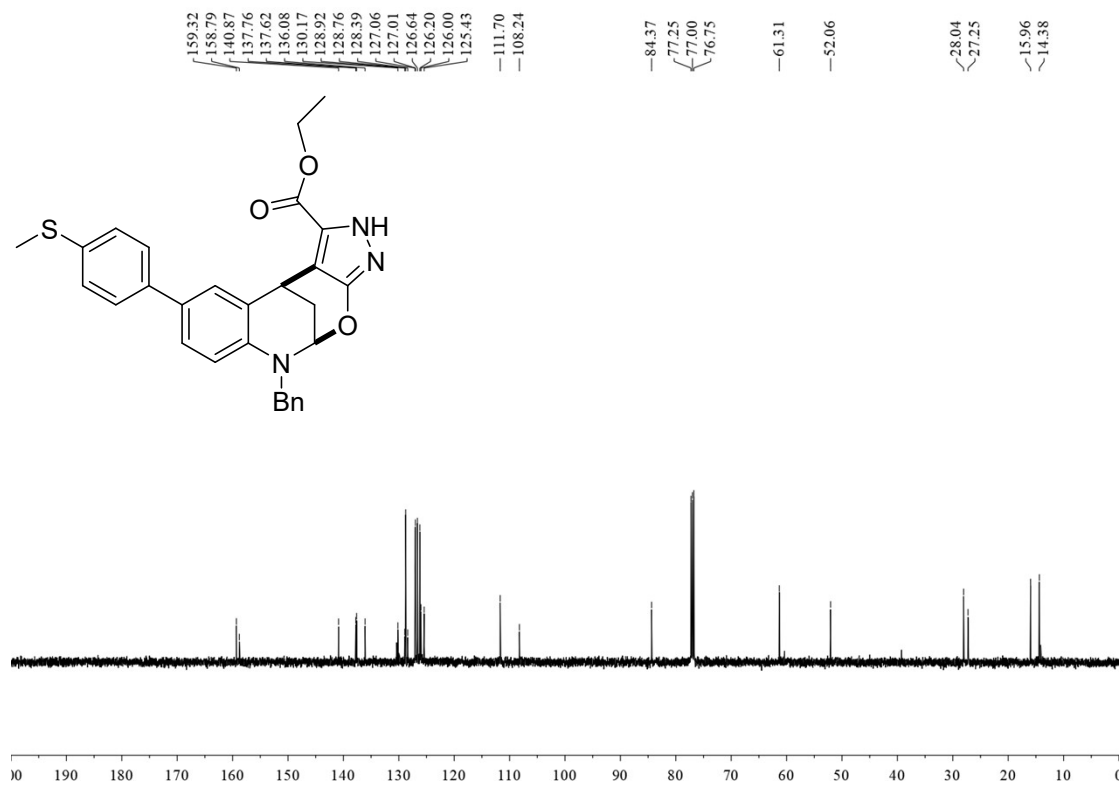

### <sup>1</sup>H-NMR spectrum of C<sub>14</sub>

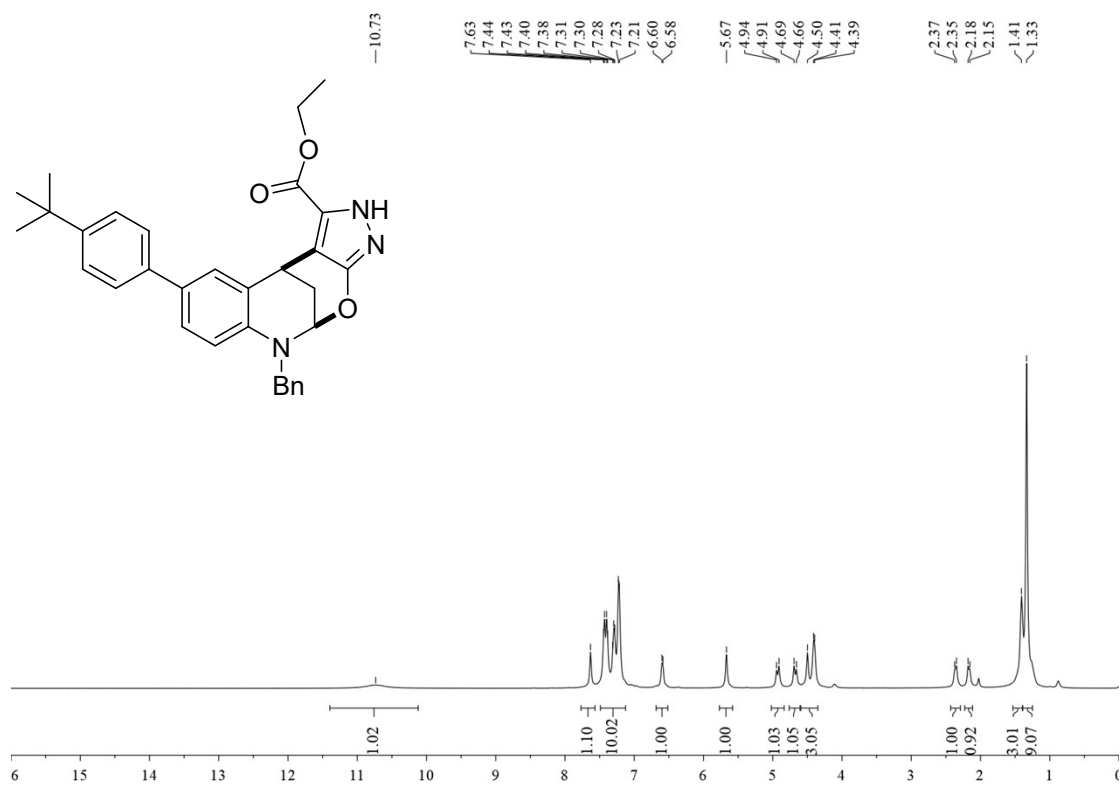

<sup>13</sup>C-NMR spectrum of C<sub>14</sub>

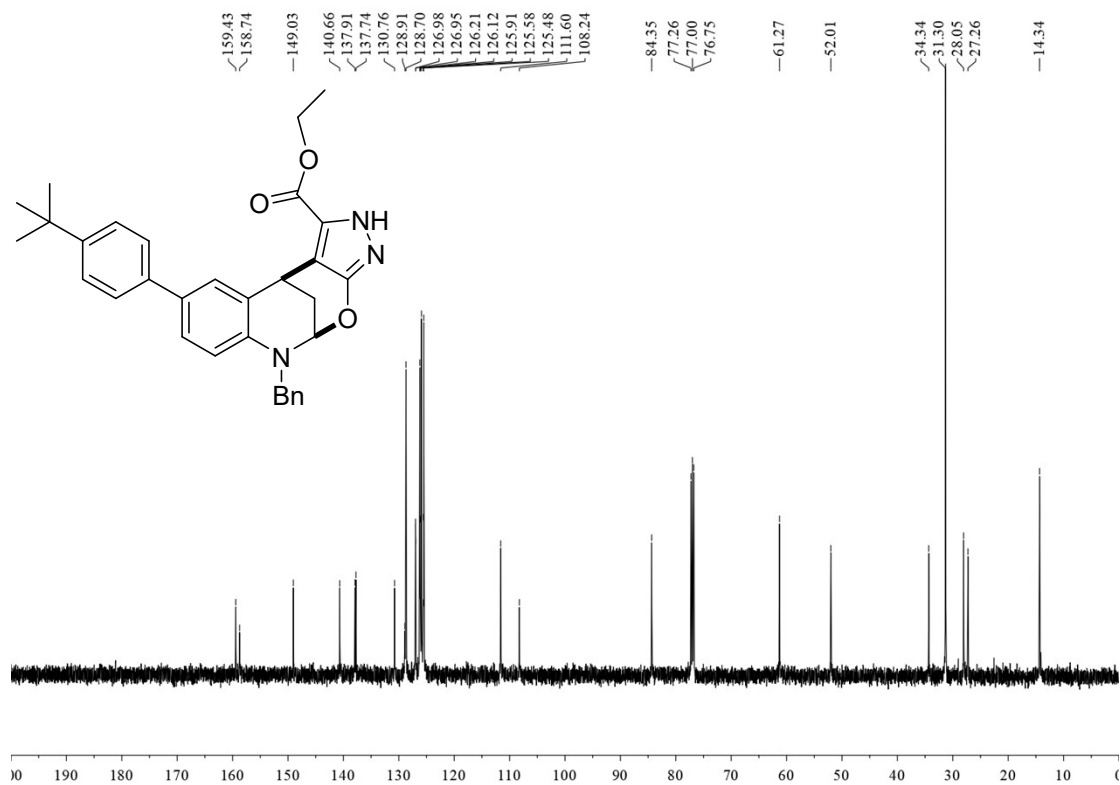

<sup>1</sup>H-NMR spectrum of C<sub>15</sub>

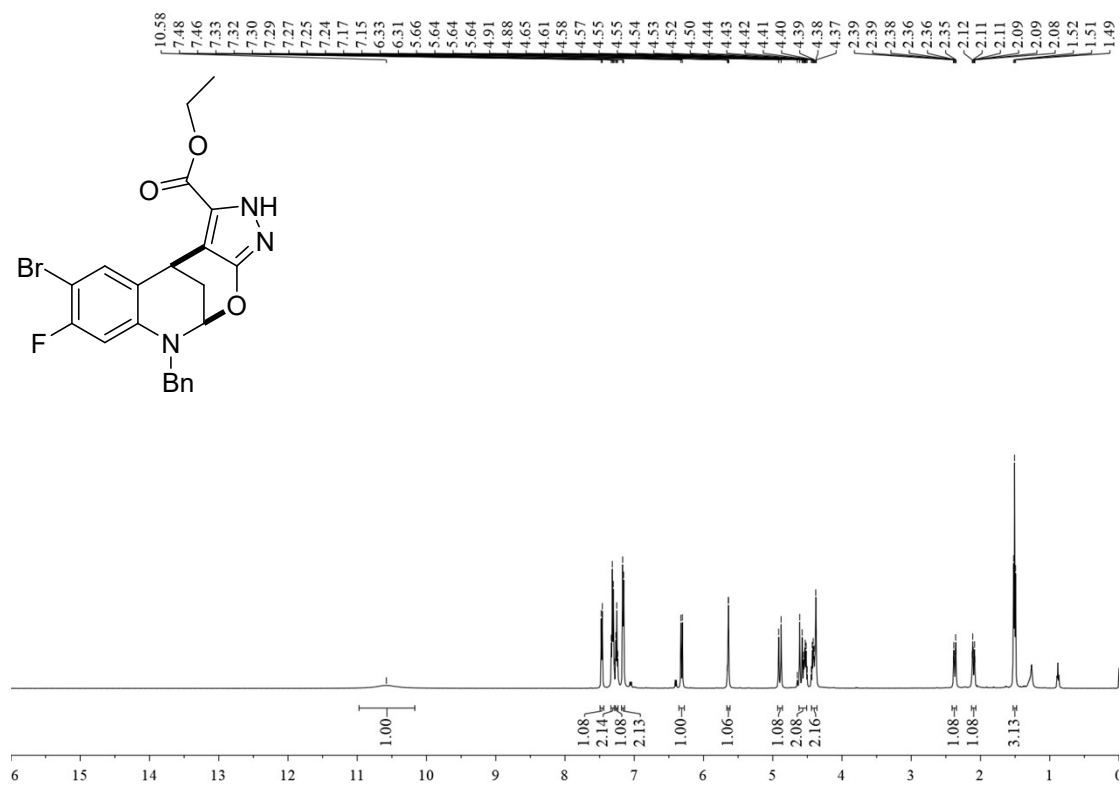

### <sup>13</sup>C-NMR spectrum of C<sub>15</sub>

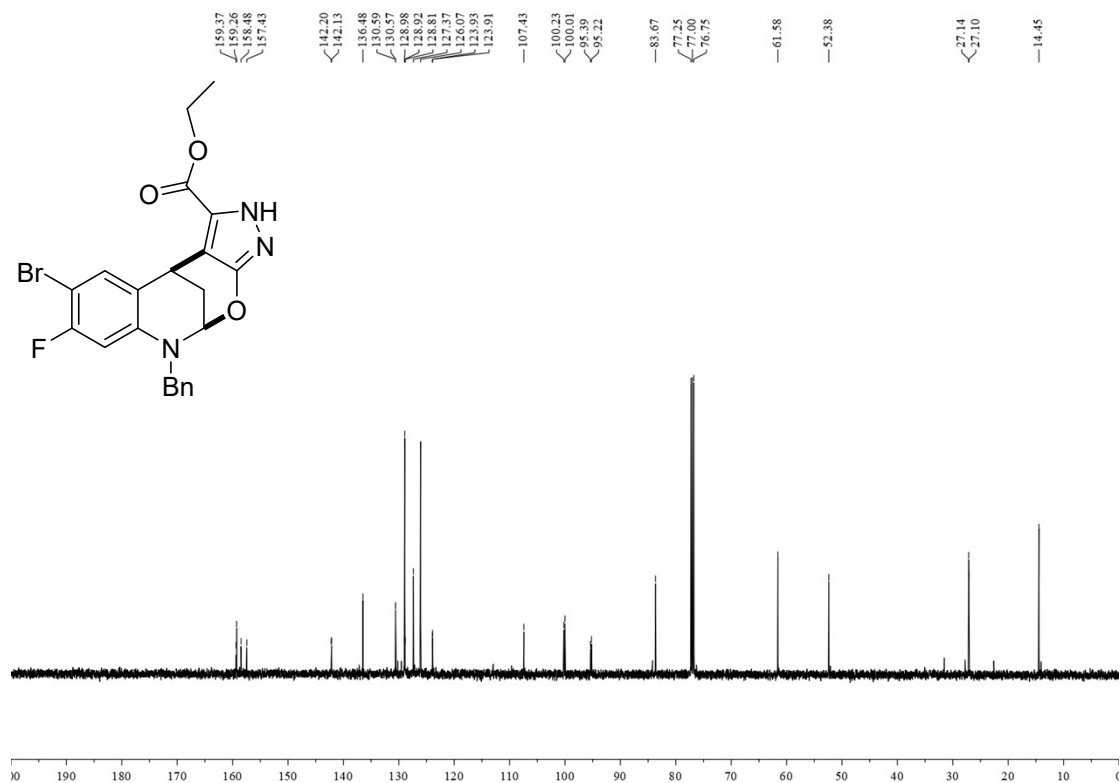

### <sup>19</sup>F-NMR spectrum of C<sub>15</sub>

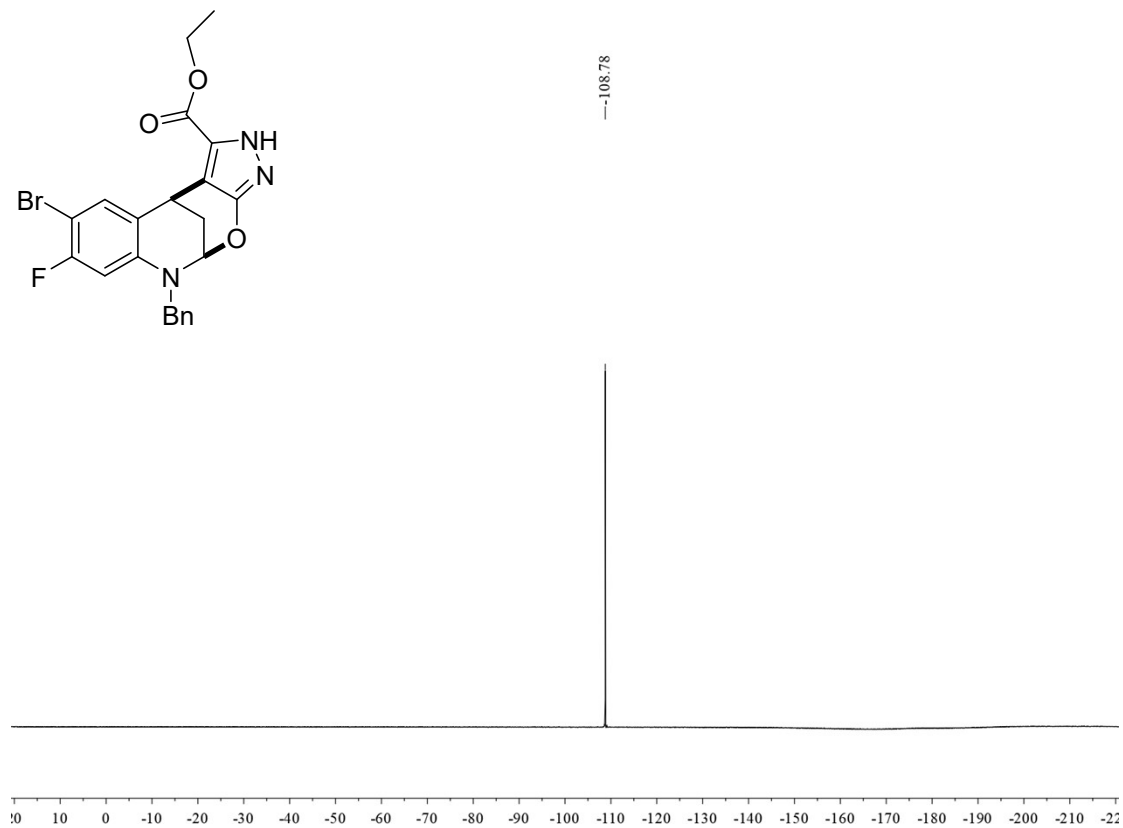



**<sup>1</sup>H-NMR spectrum of C<sub>16</sub>**

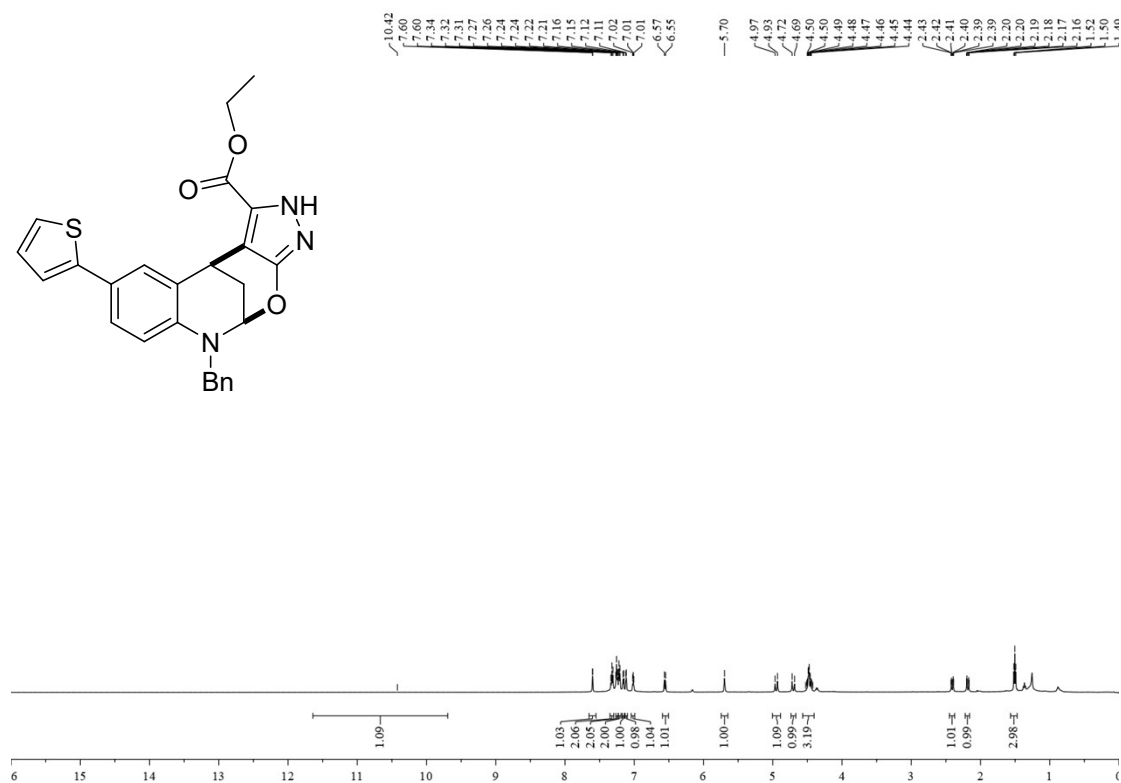

**<sup>13</sup>C-NMR spectrum of C<sub>16</sub>**

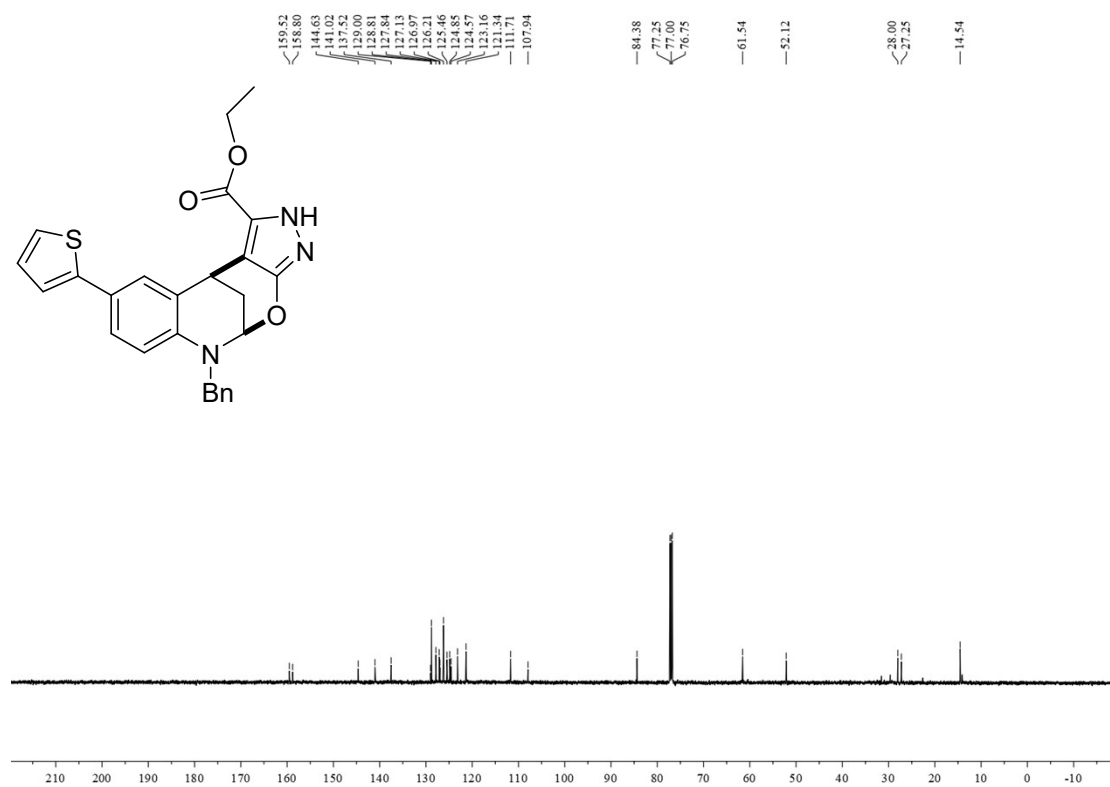

### <sup>1</sup>H-NMR spectrum of C<sub>17</sub>

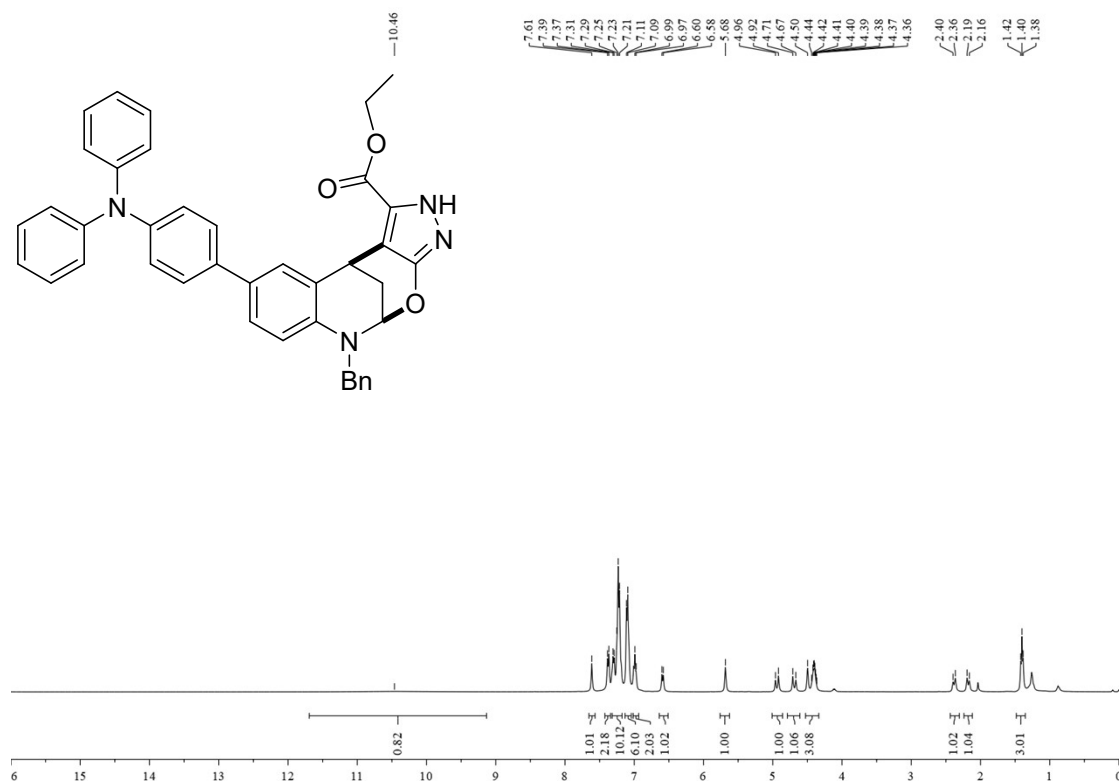

### <sup>13</sup>C-NMR spectrum of C<sub>17</sub>

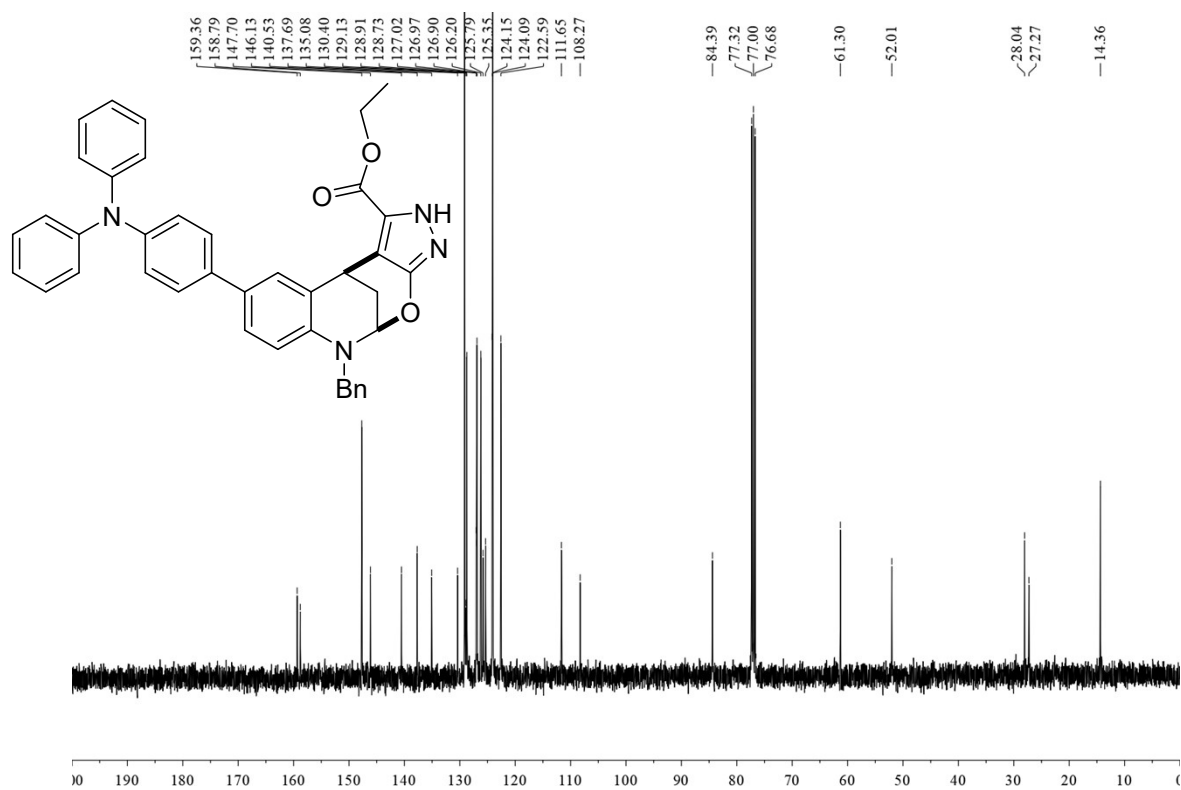

**<sup>1</sup>H-NMR spectrum of C<sub>18</sub>**

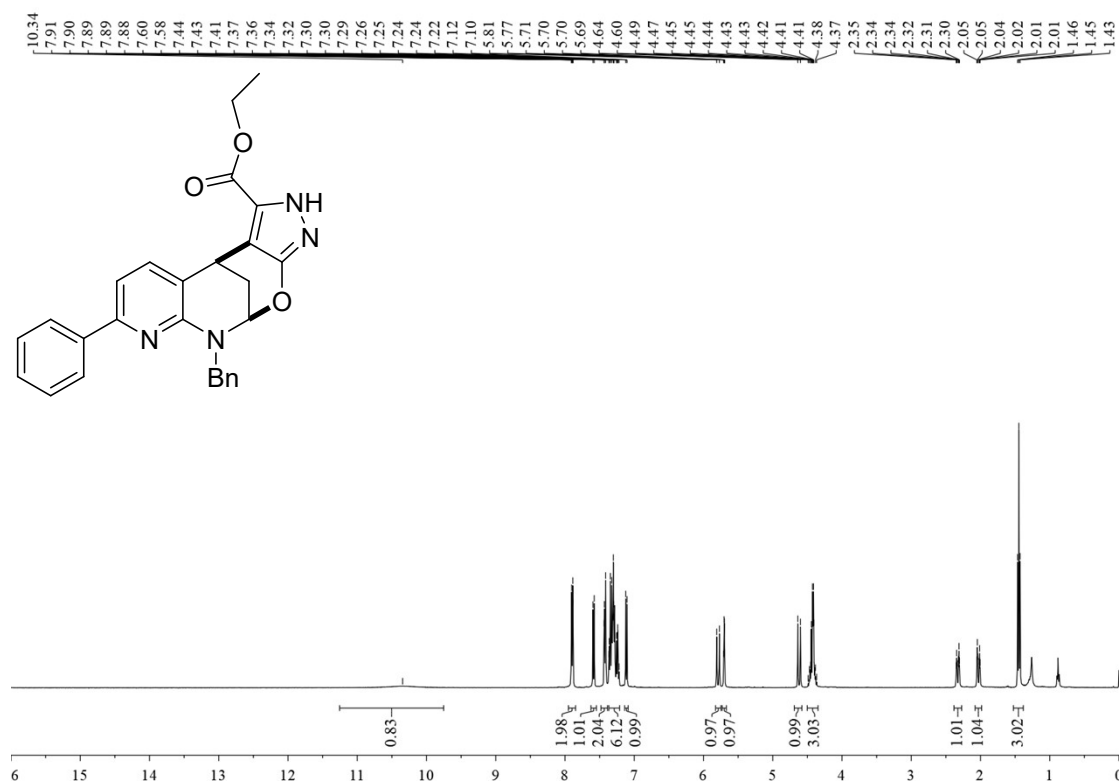

**<sup>13</sup>C-NMR spectrum of C<sub>18</sub>**

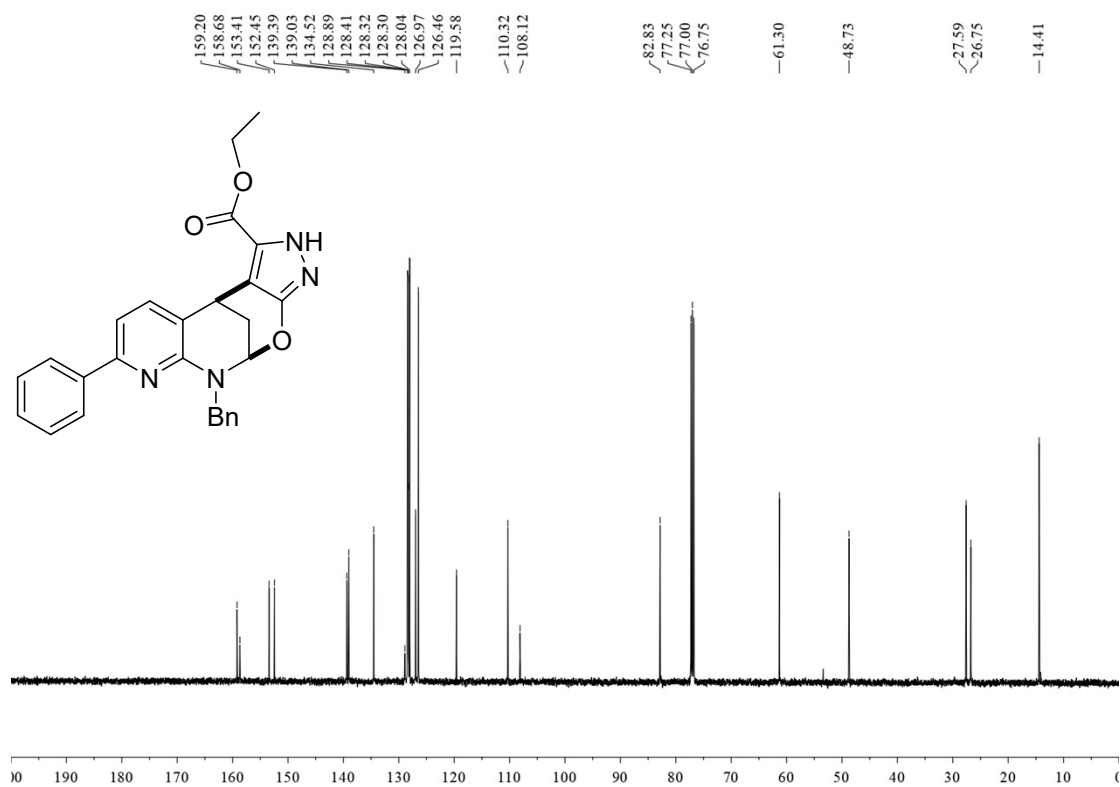

### <sup>1</sup>H-NMR spectrum of C<sub>19</sub>

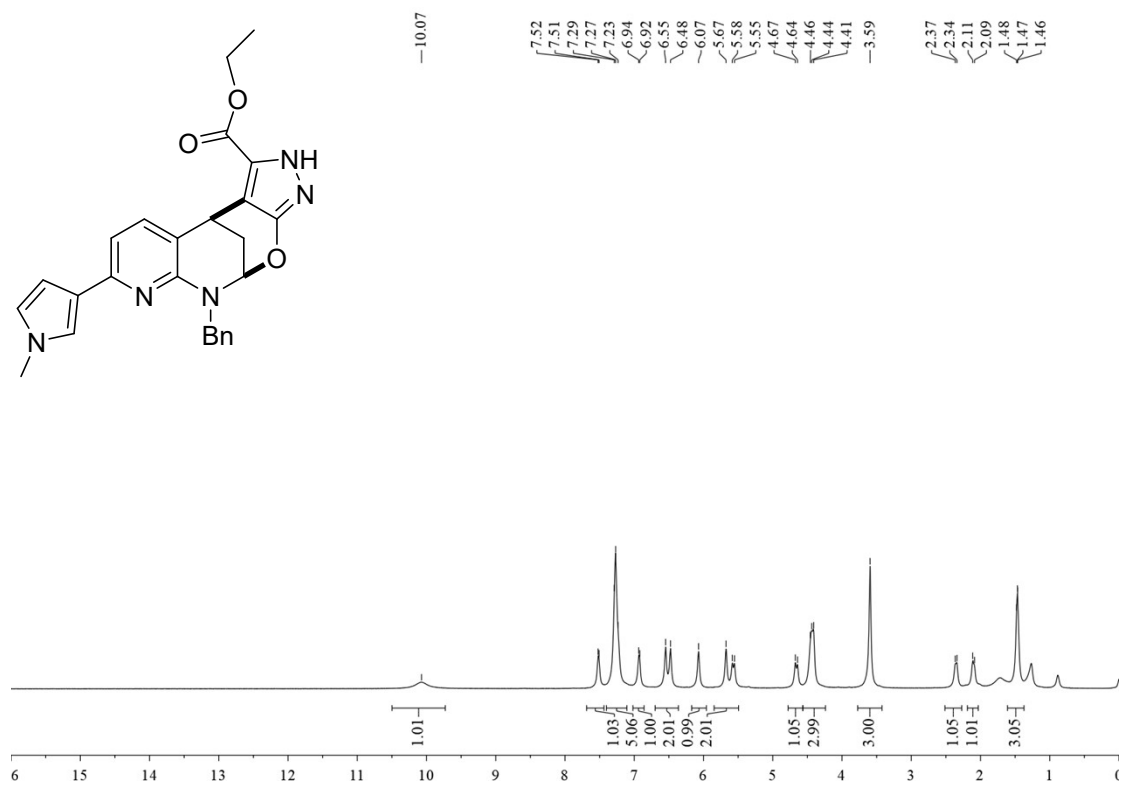

### <sup>13</sup>C-NMR spectrum of C<sub>19</sub>

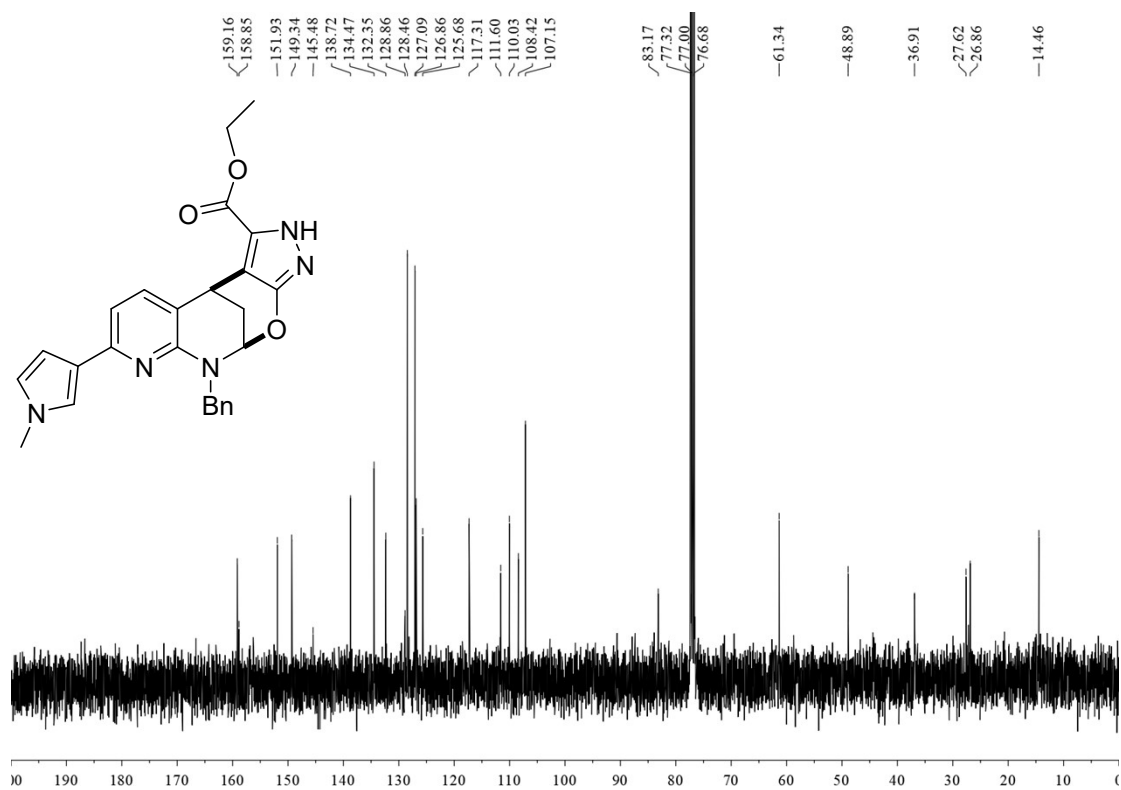

**<sup>1</sup>H-NMR spectrum of C<sub>20</sub>**

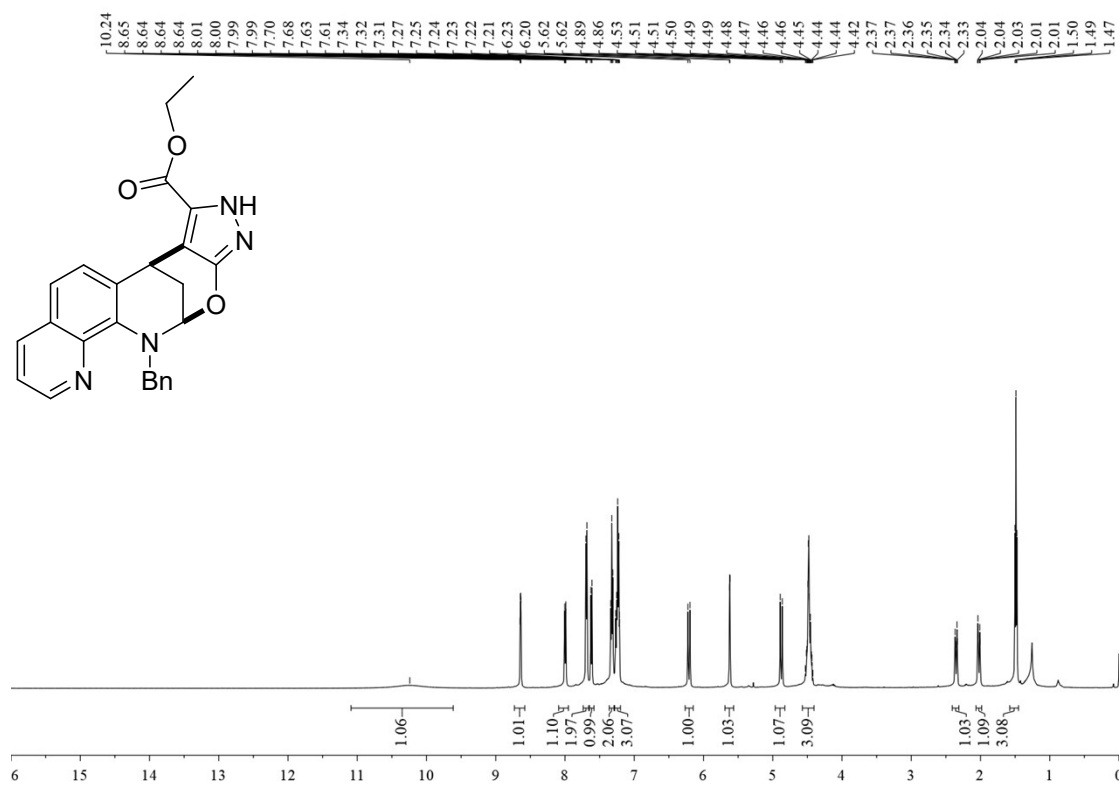

**<sup>13</sup>C-NMR spectrum of C<sub>20</sub>**

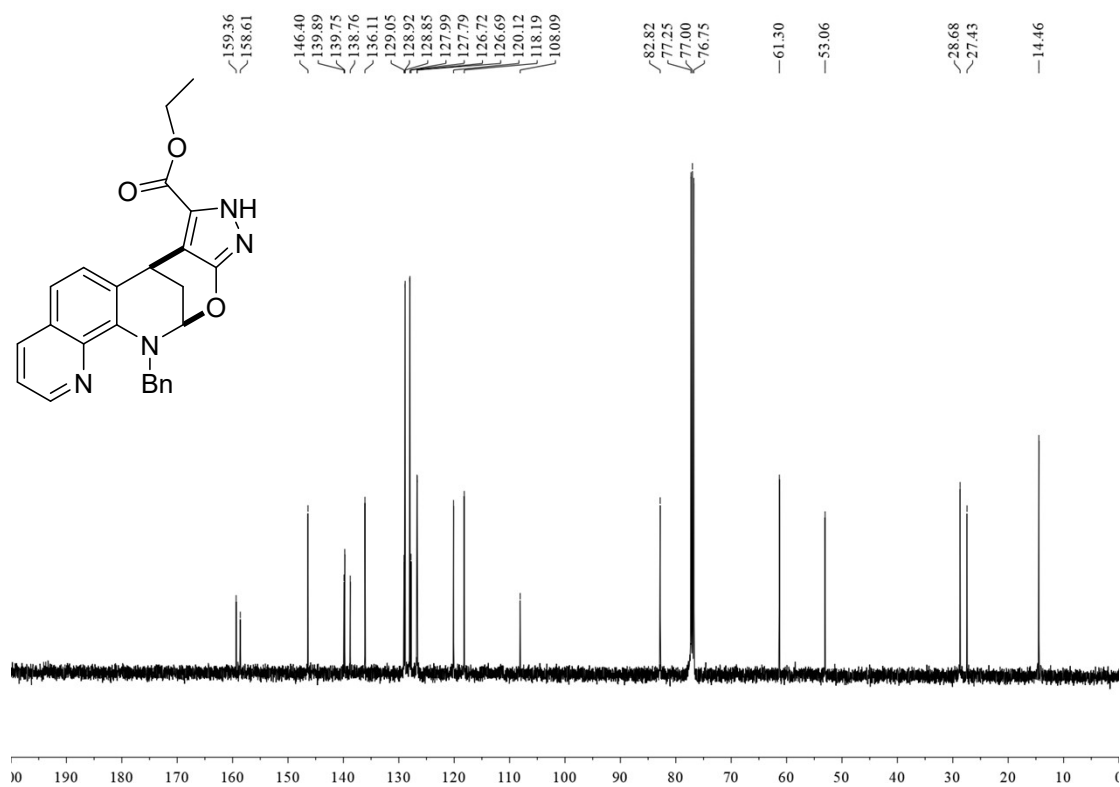

**<sup>1</sup>H-NMR spectrum of C<sub>21</sub>**

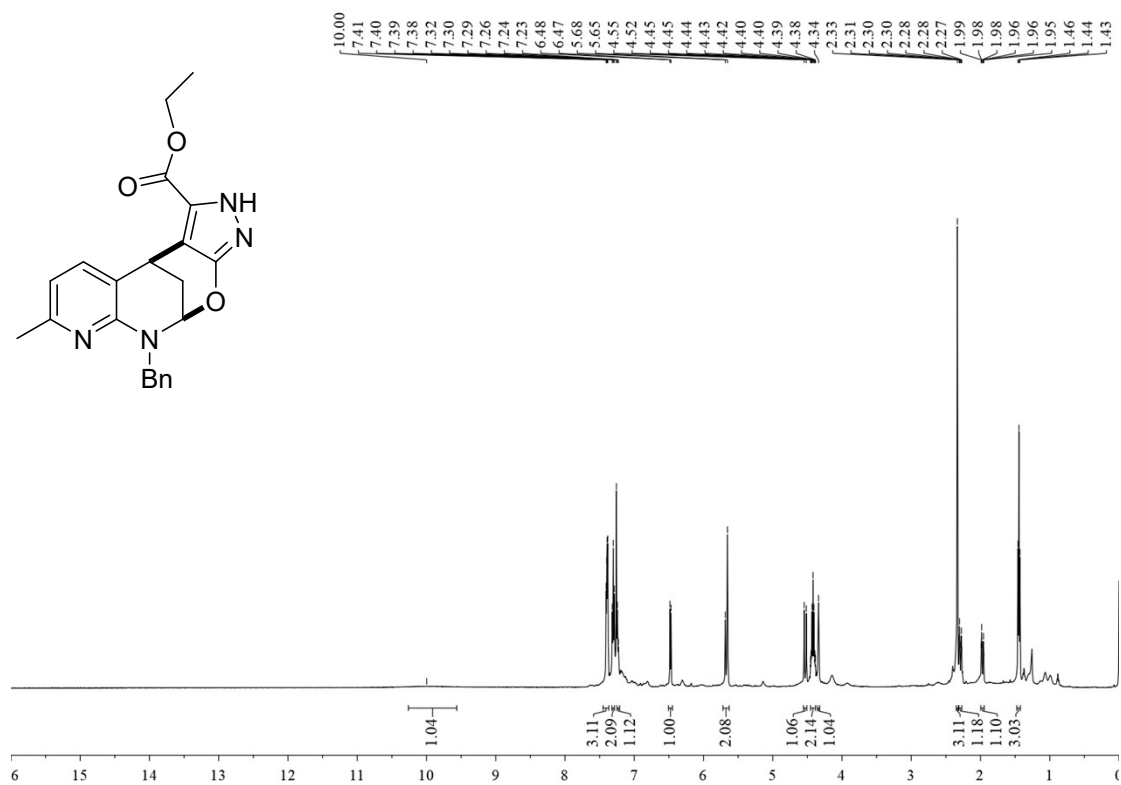

**<sup>13</sup>C-NMR spectrum of C<sub>21</sub>**

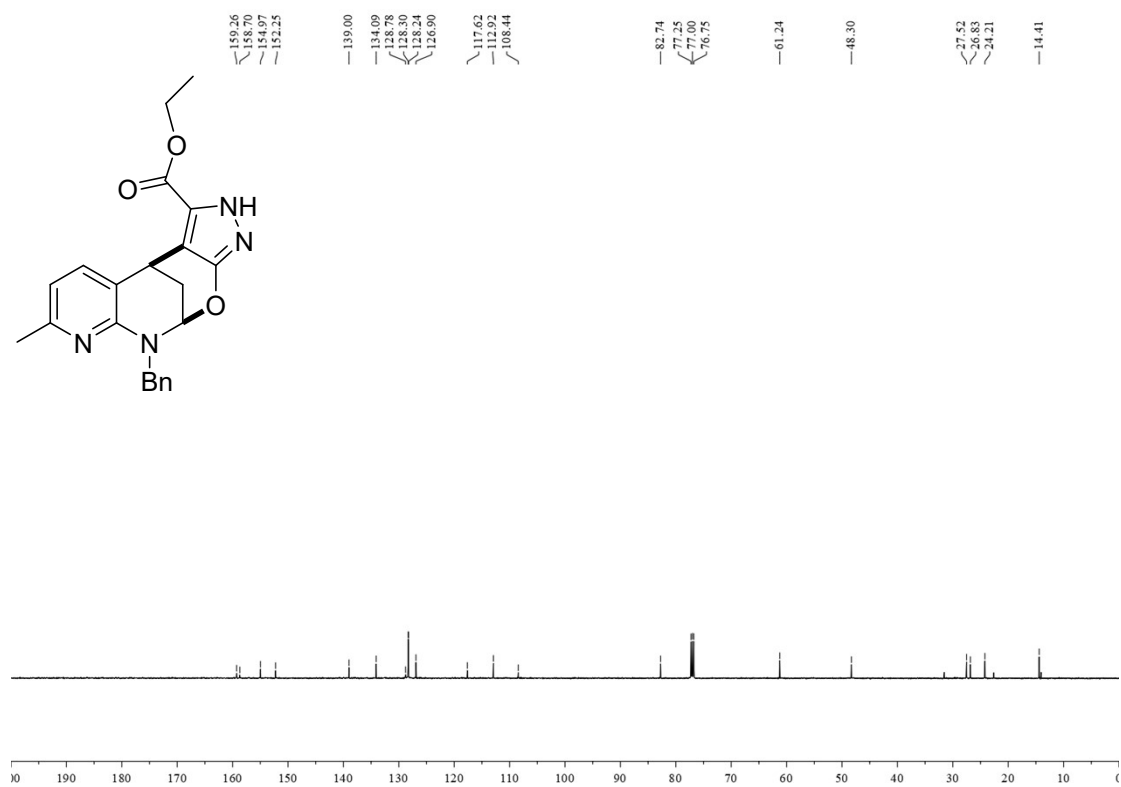

**<sup>1</sup>H-NMR spectrum of C<sub>22</sub>**

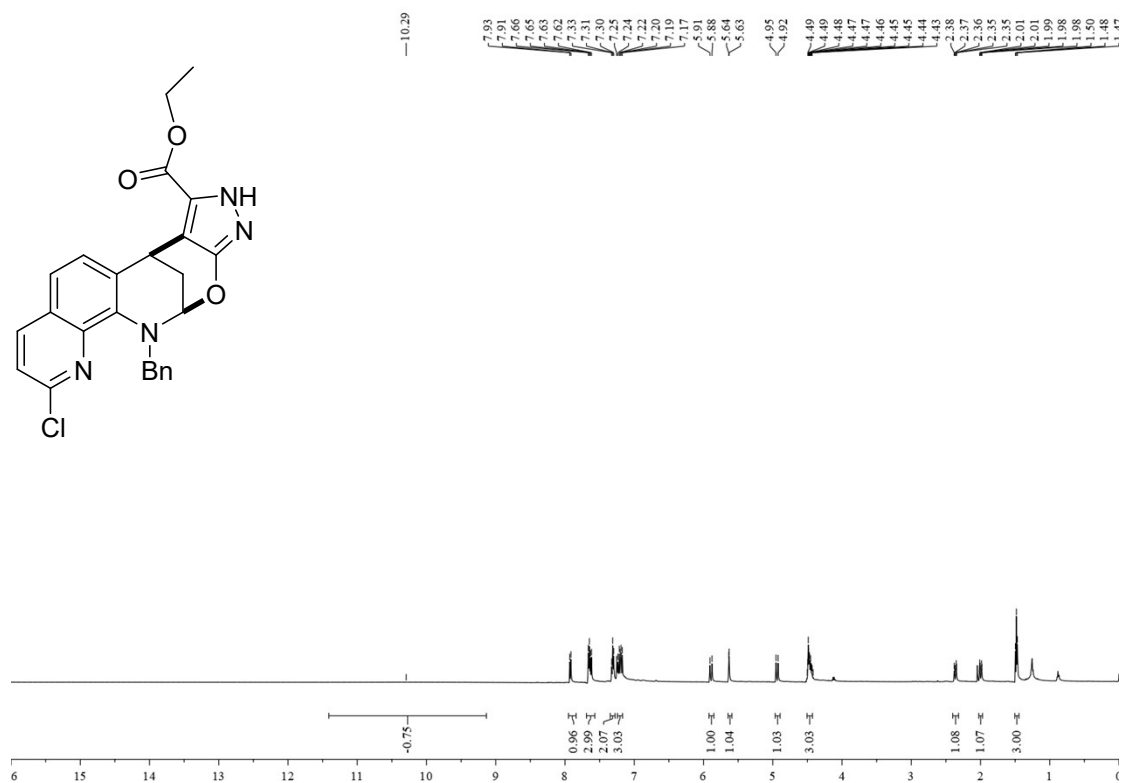

**<sup>13</sup>C-NMR spectrum of C<sub>22</sub>**

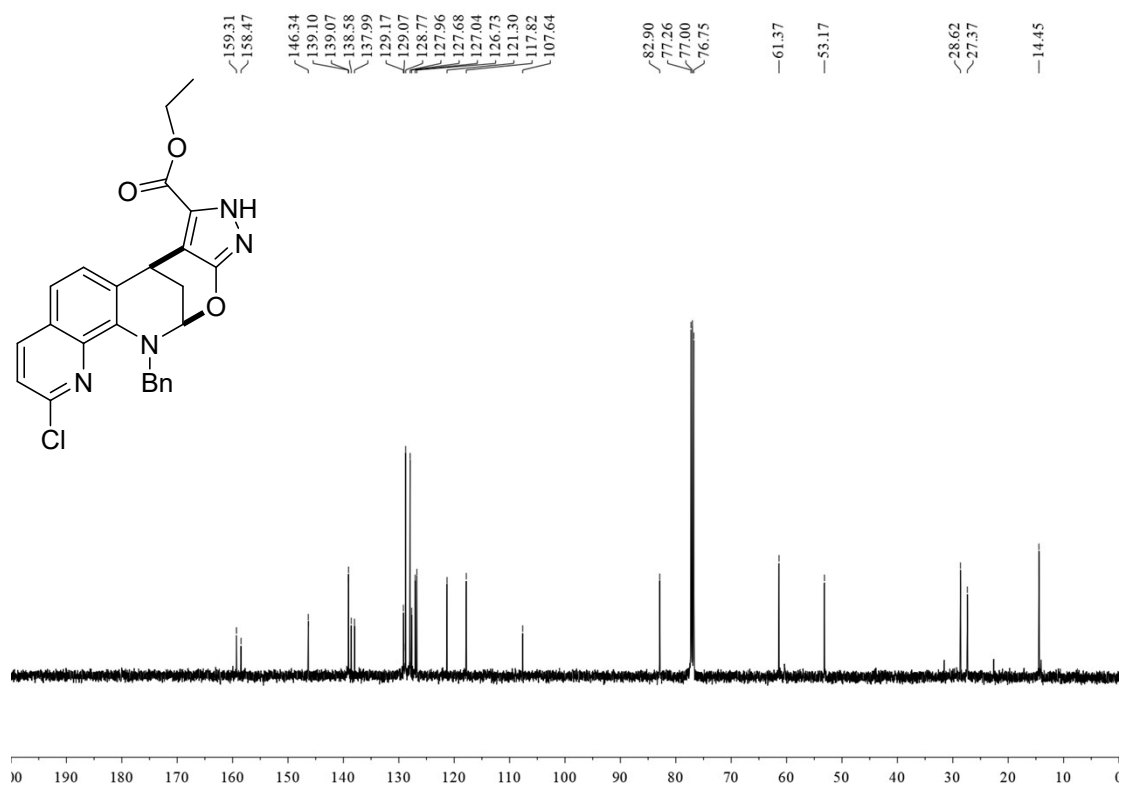

### $^1\text{H-NMR}$ spectrum of $\text{C}_{23}$

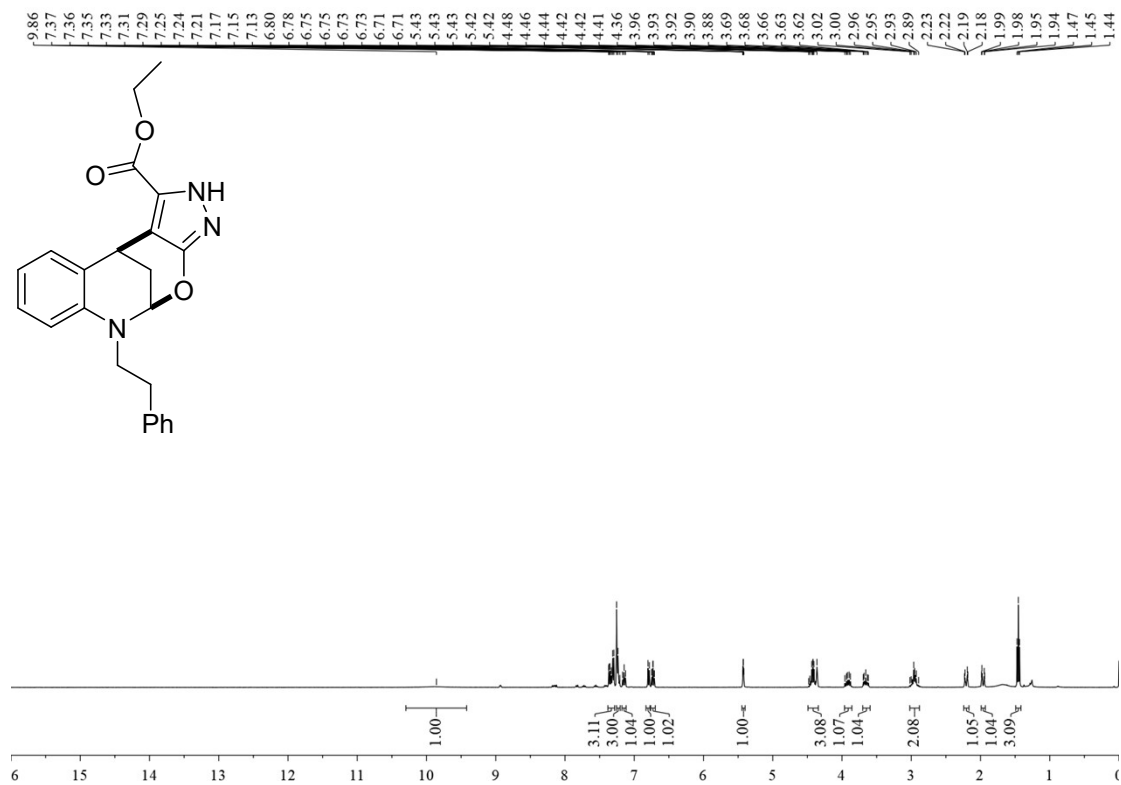

### $^{13}\text{C-NMR}$ spectrum of $\text{C}_{23}$

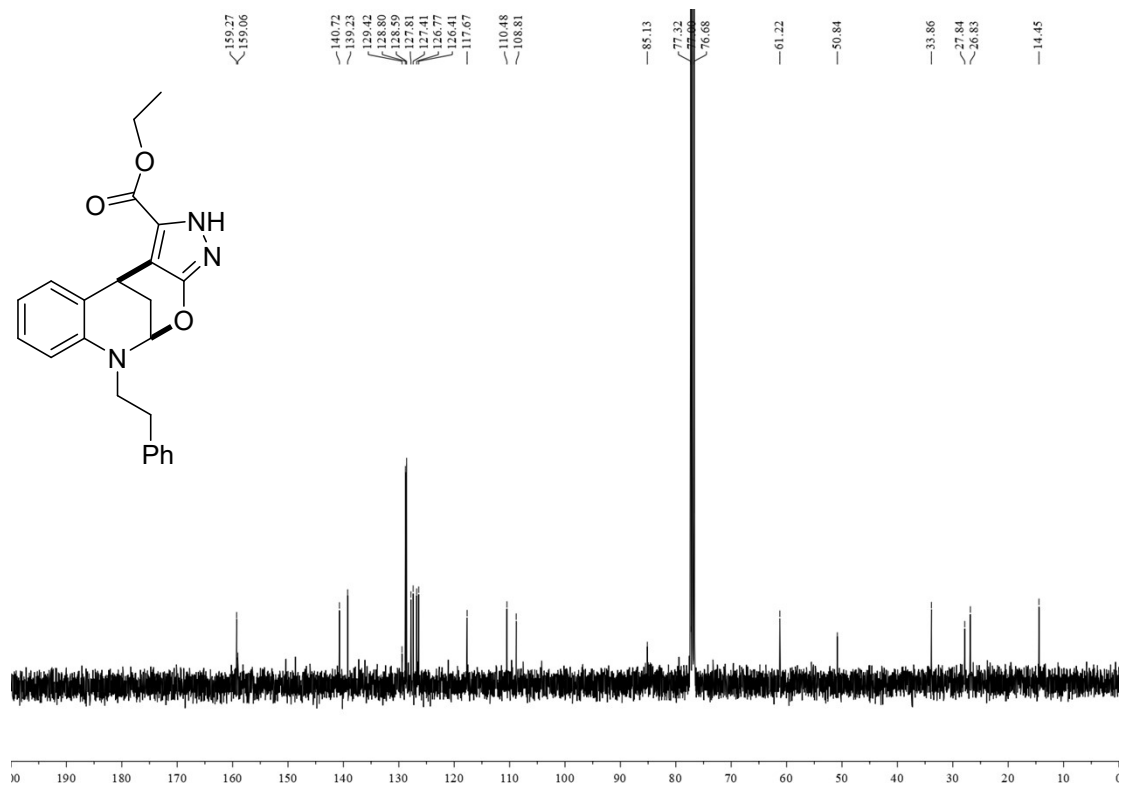



**<sup>1</sup>H-NMR spectrum of C<sub>24</sub>**

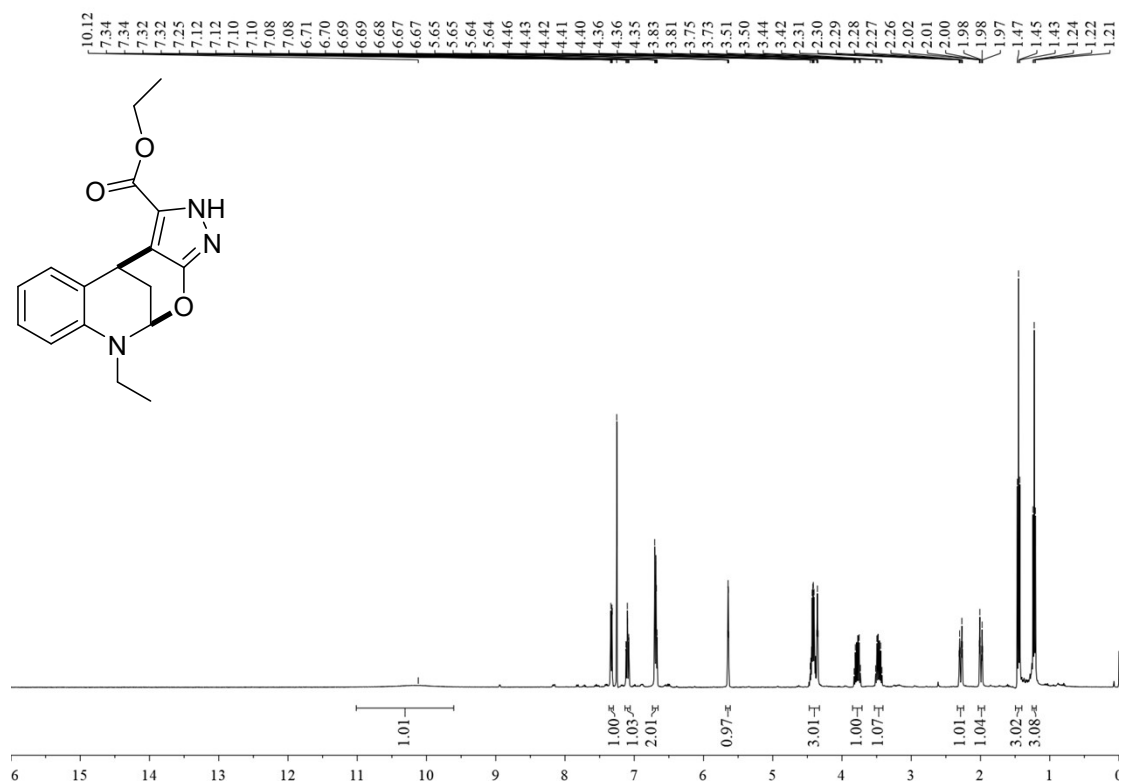

**<sup>13</sup>C-NMR spectrum of C<sub>24</sub>**

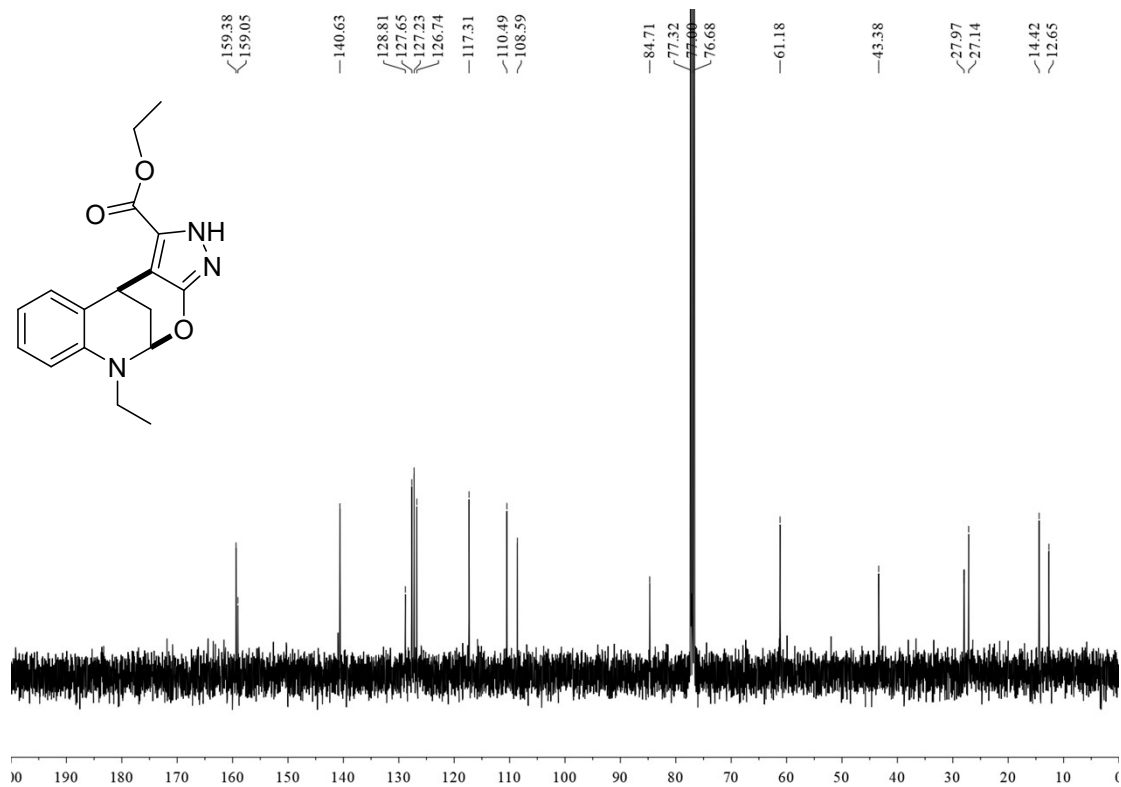



**<sup>19</sup>F-NMR spectrum of C<sub>25</sub>**

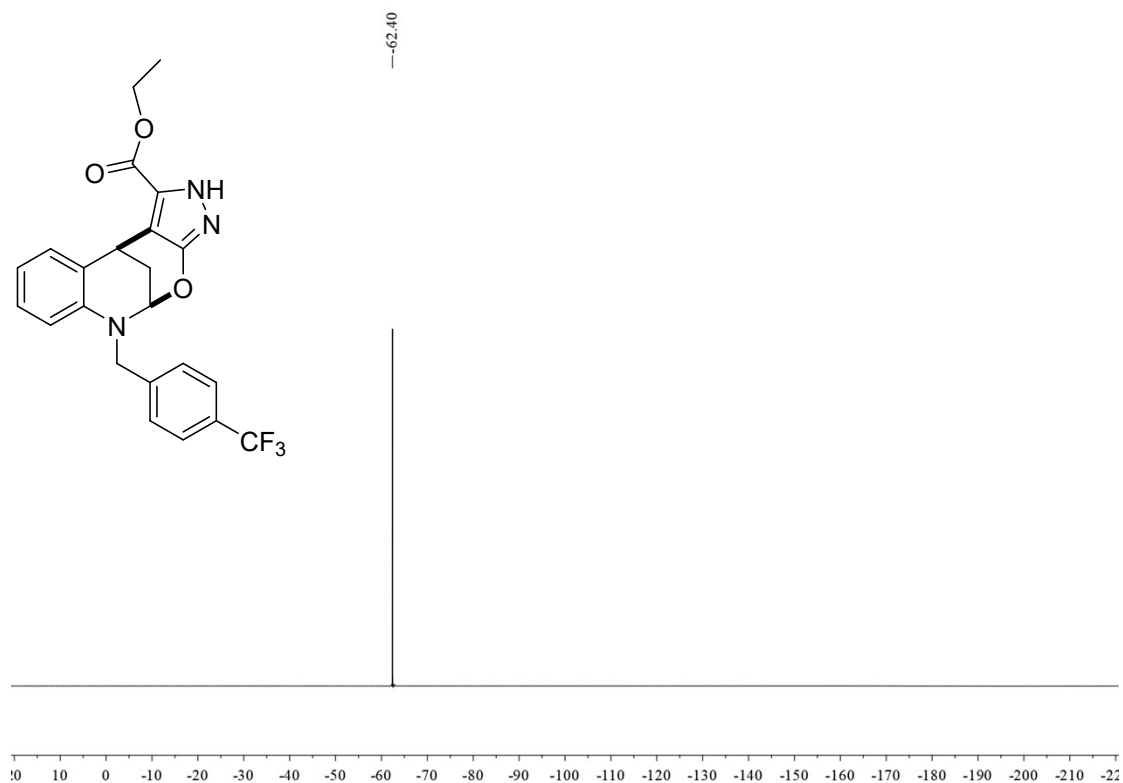

**<sup>1</sup>H-NMR spectrum of C<sub>26</sub>**

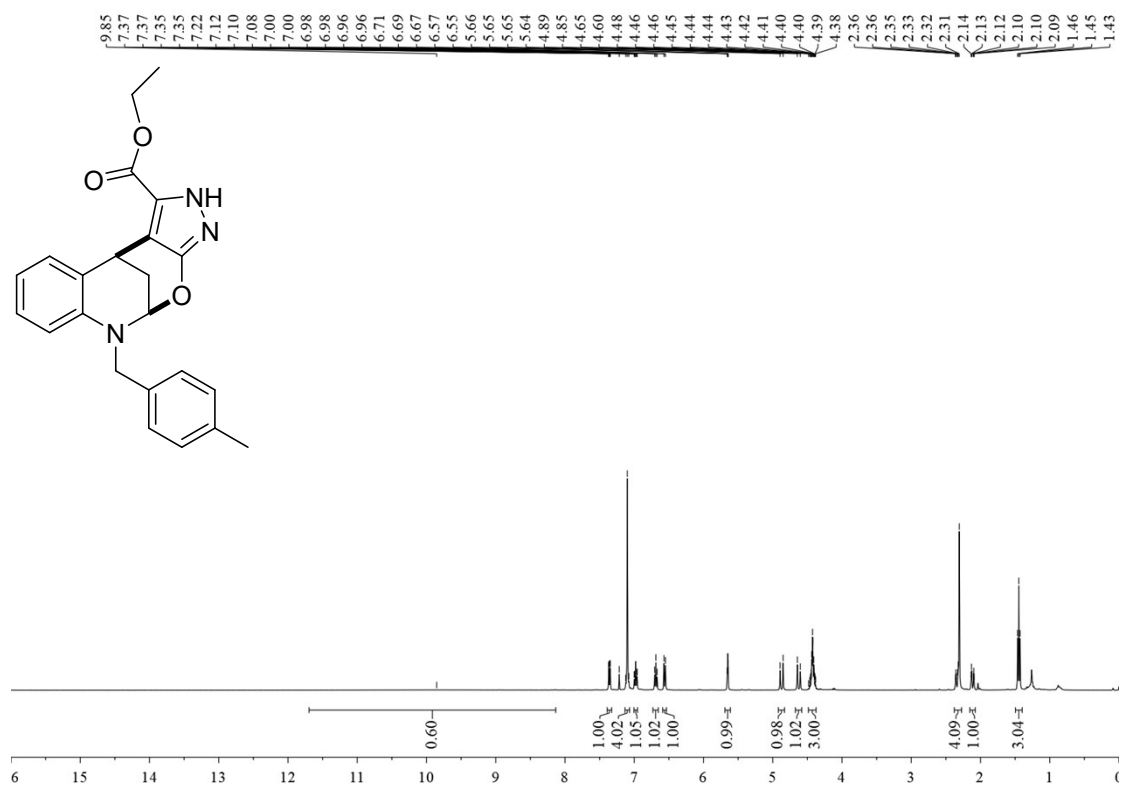

**<sup>13</sup>C-NMR spectrum of C<sub>26</sub>**

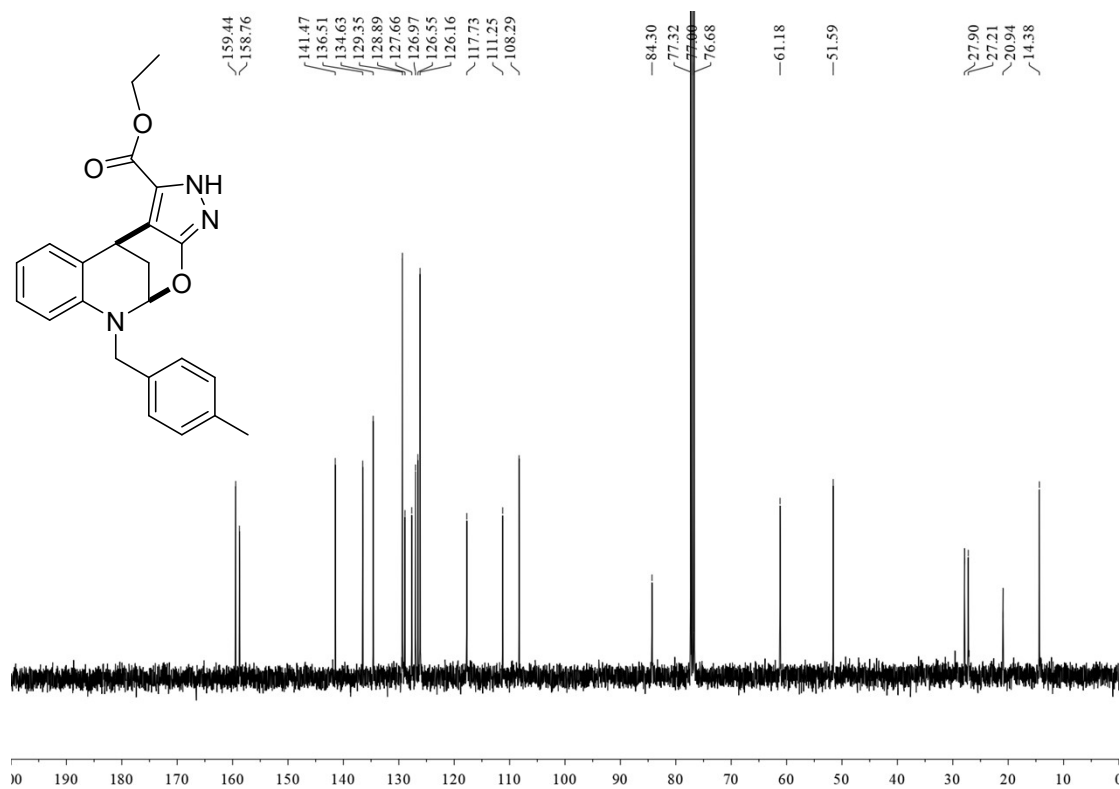

**<sup>1</sup>H-NMR spectrum of C<sub>27</sub>**

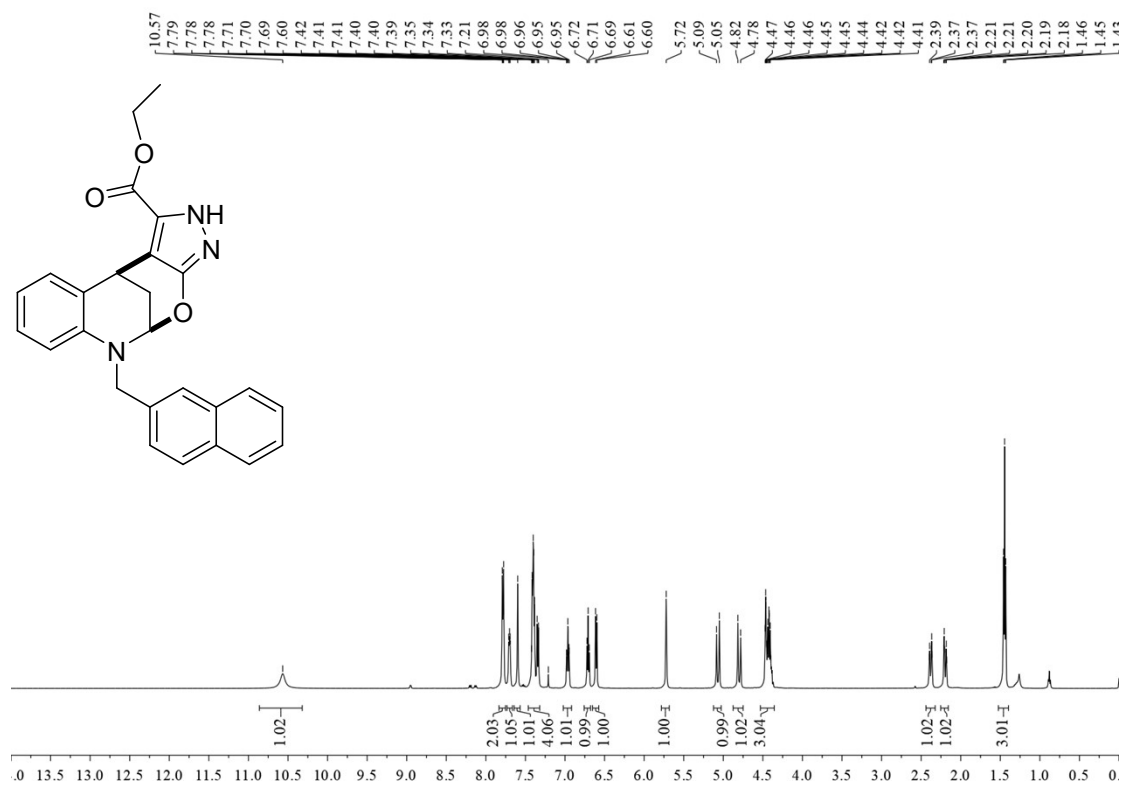

**<sup>13</sup>C-NMR spectrum of C<sub>27</sub>**

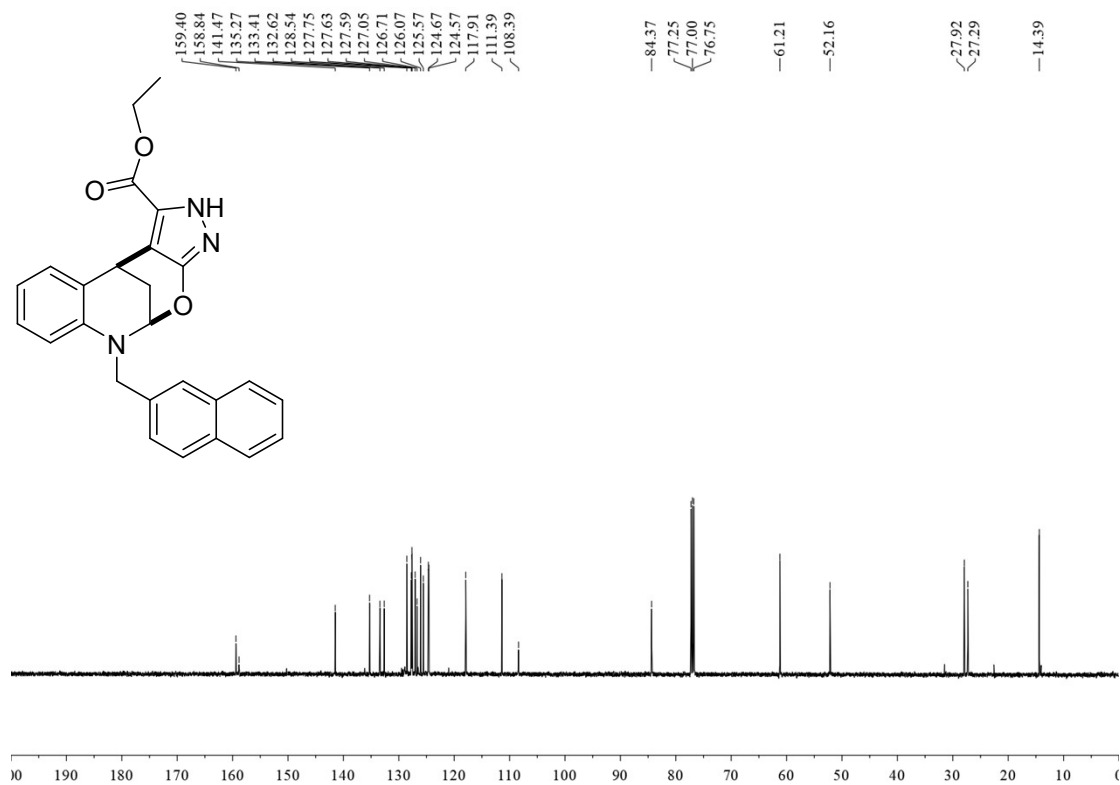

**<sup>1</sup>H-NMR spectrum of C<sub>28</sub>**

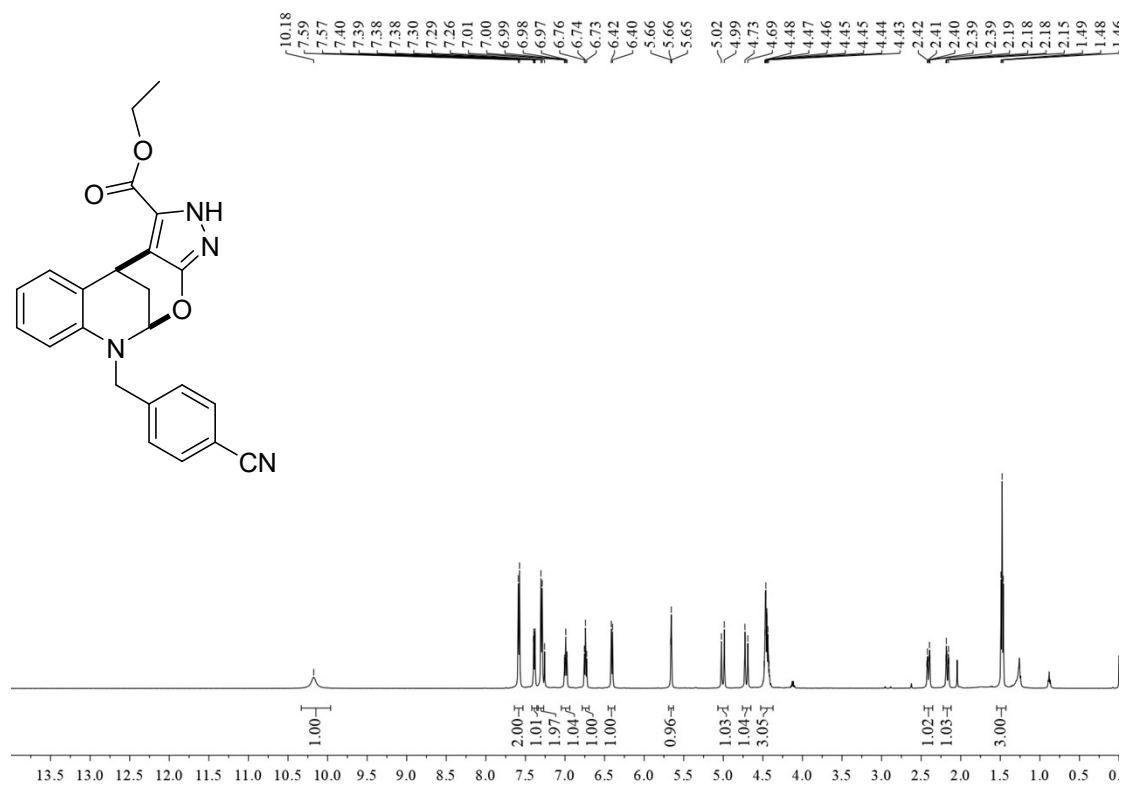

**<sup>13</sup>C-NMR spectrum of C<sub>28</sub>**

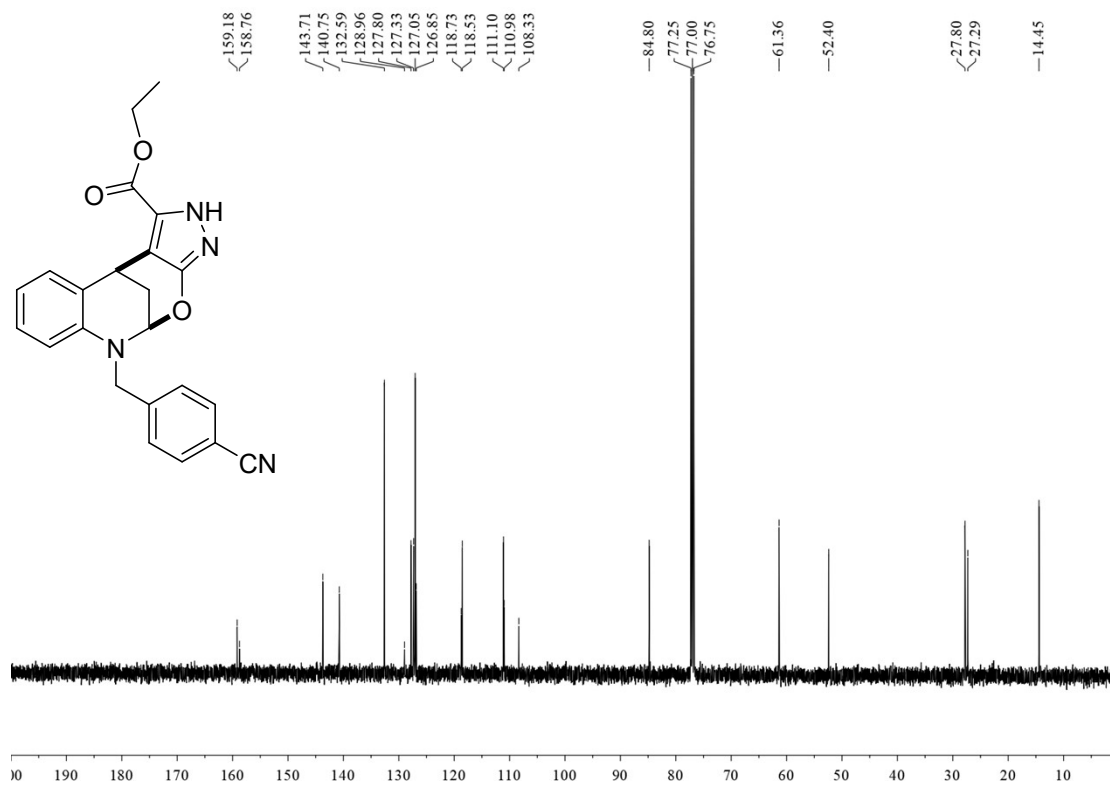

**<sup>1</sup>H-NMR spectrum of C<sub>29</sub>**

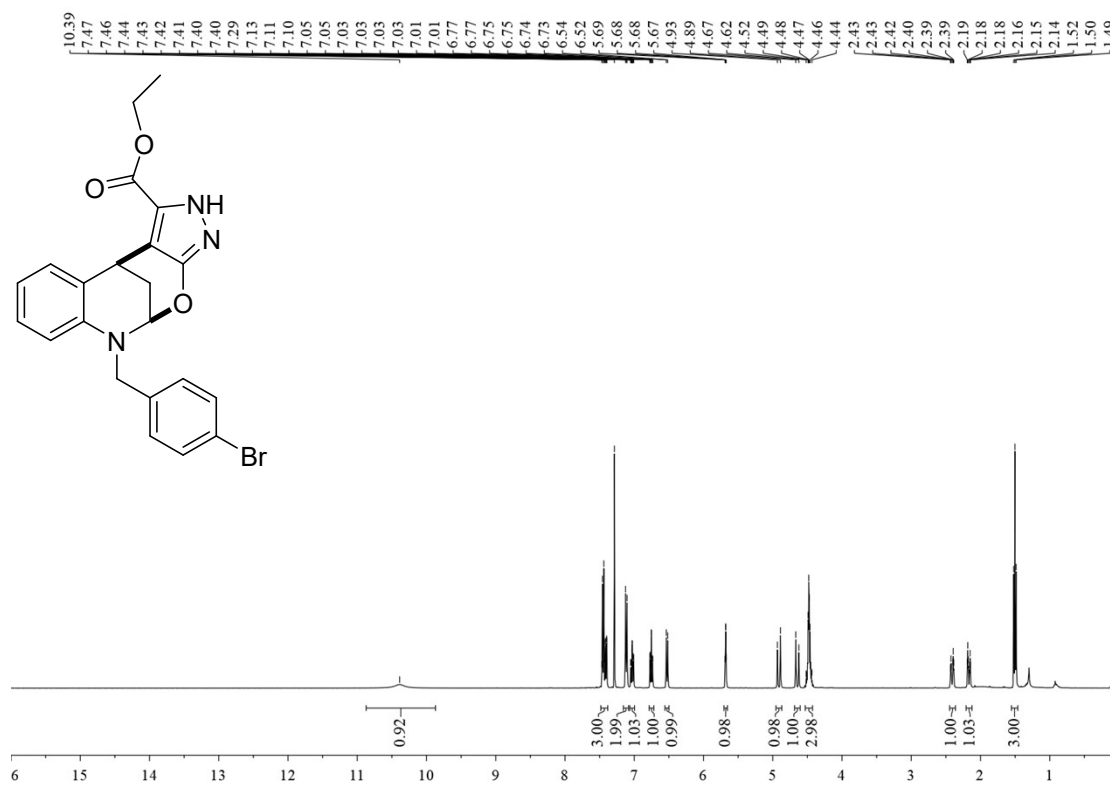

### <sup>13</sup>C-NMR spectrum of C<sub>29</sub>

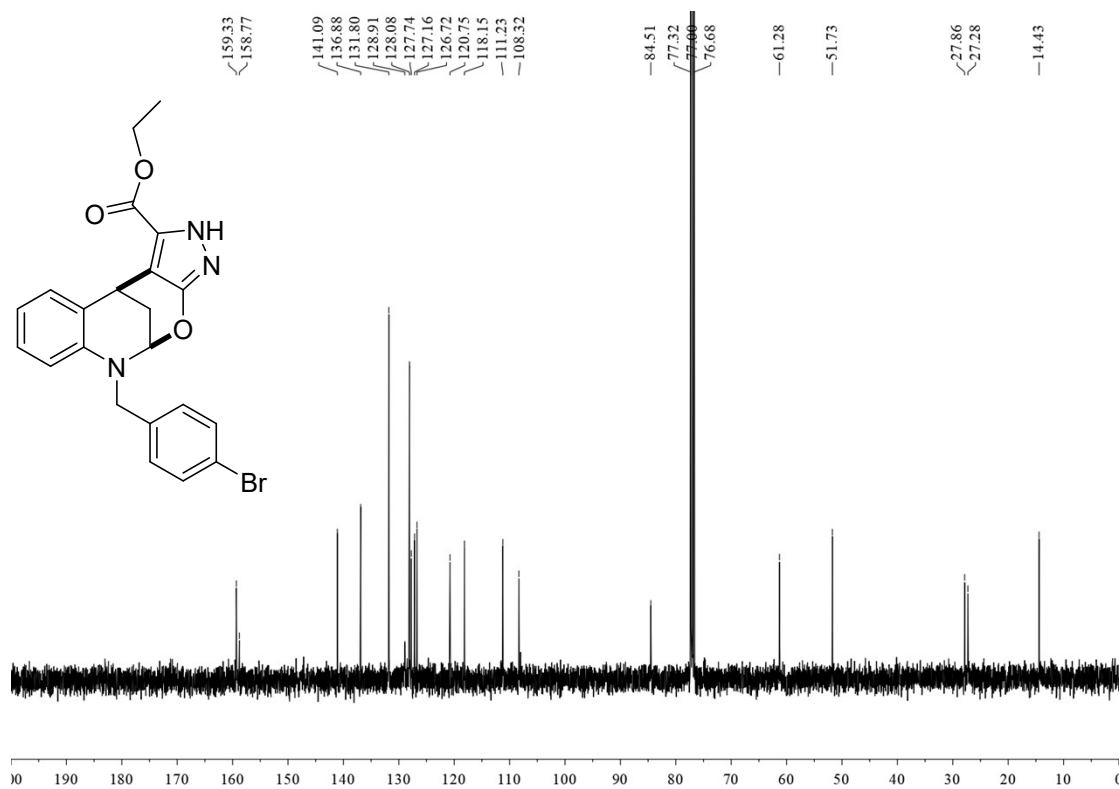

### <sup>1</sup>H-NMR spectrum of C<sub>30</sub>

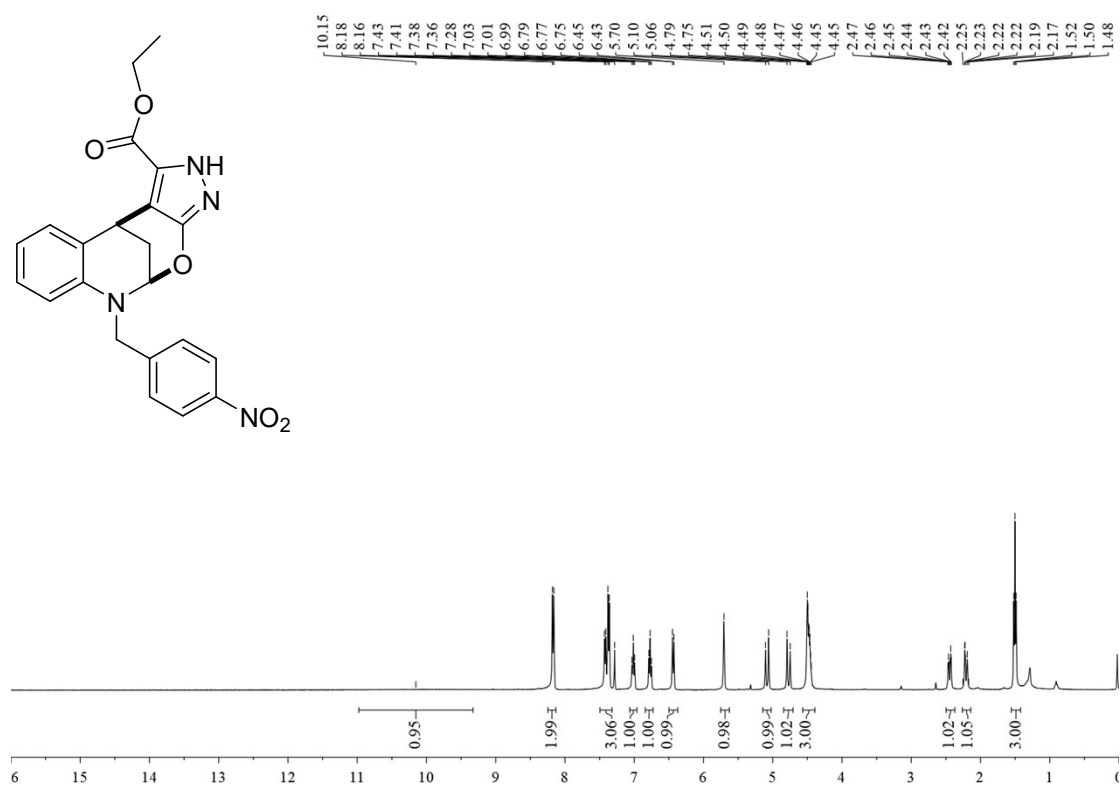

**<sup>13</sup>C-NMR spectrum of C<sub>30</sub>**

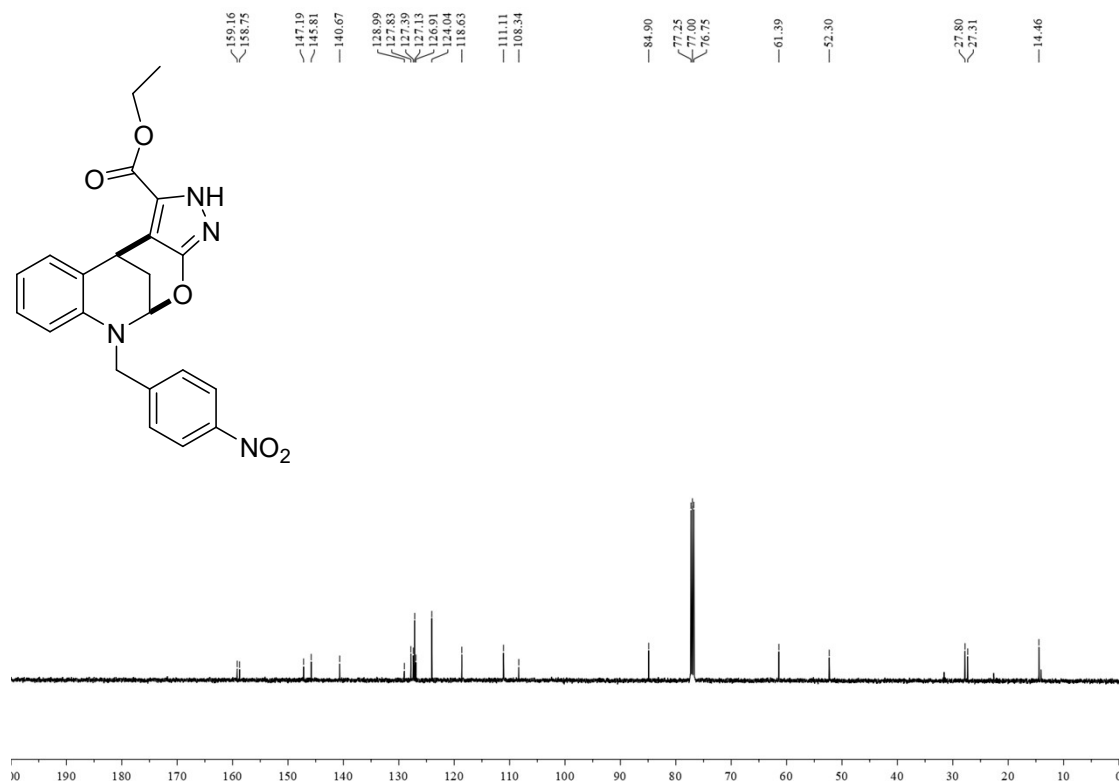

**<sup>1</sup>H-NMR spectrum of C<sub>31</sub>**

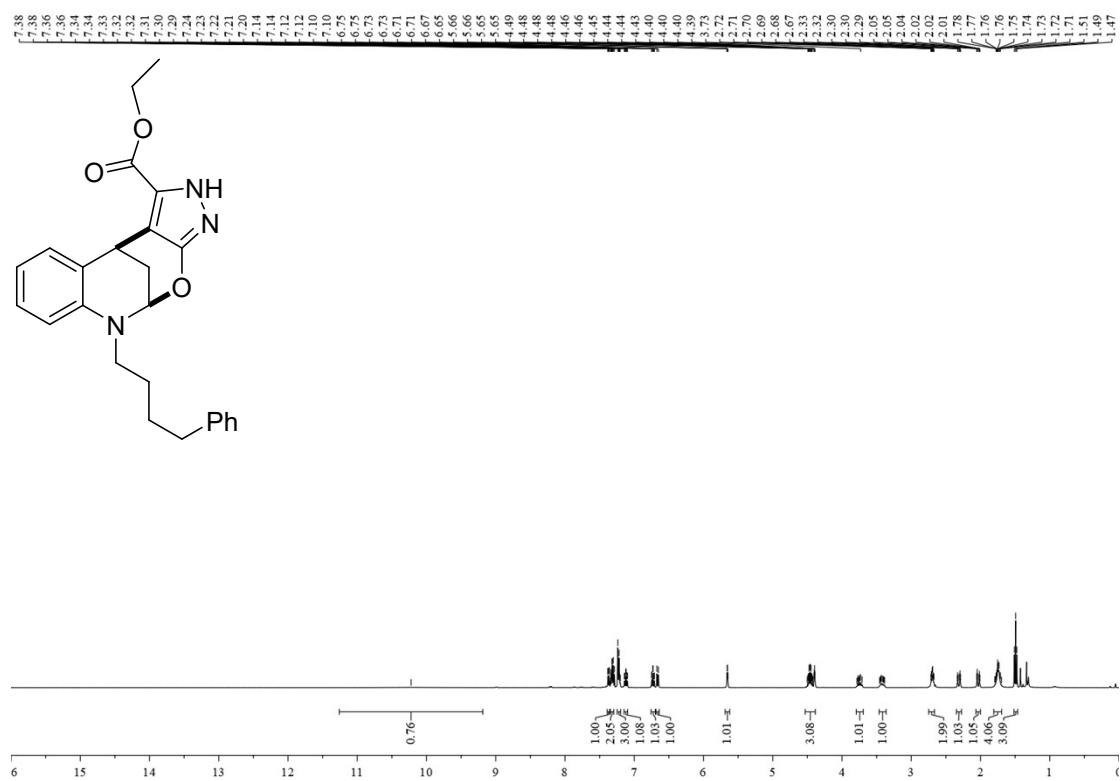





### <sup>13</sup>C-NMR spectrum of C<sub>32</sub>

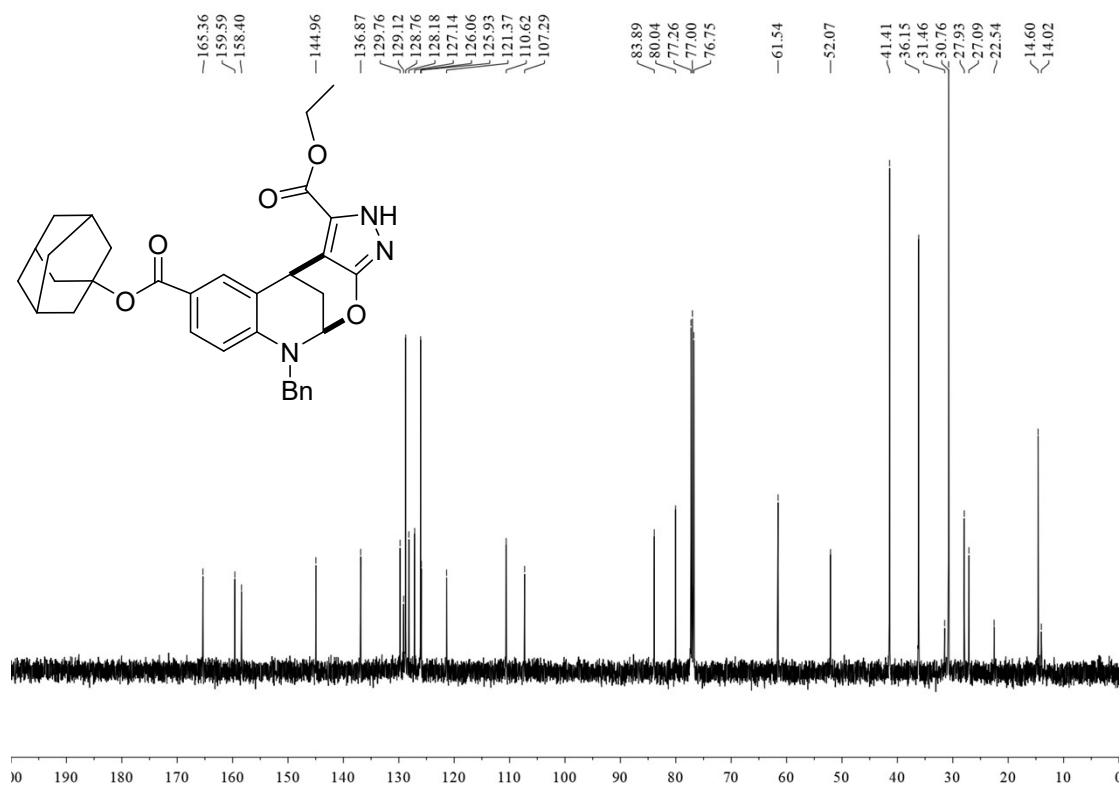

### <sup>1</sup>H-NMR spectrum of C<sub>33</sub>

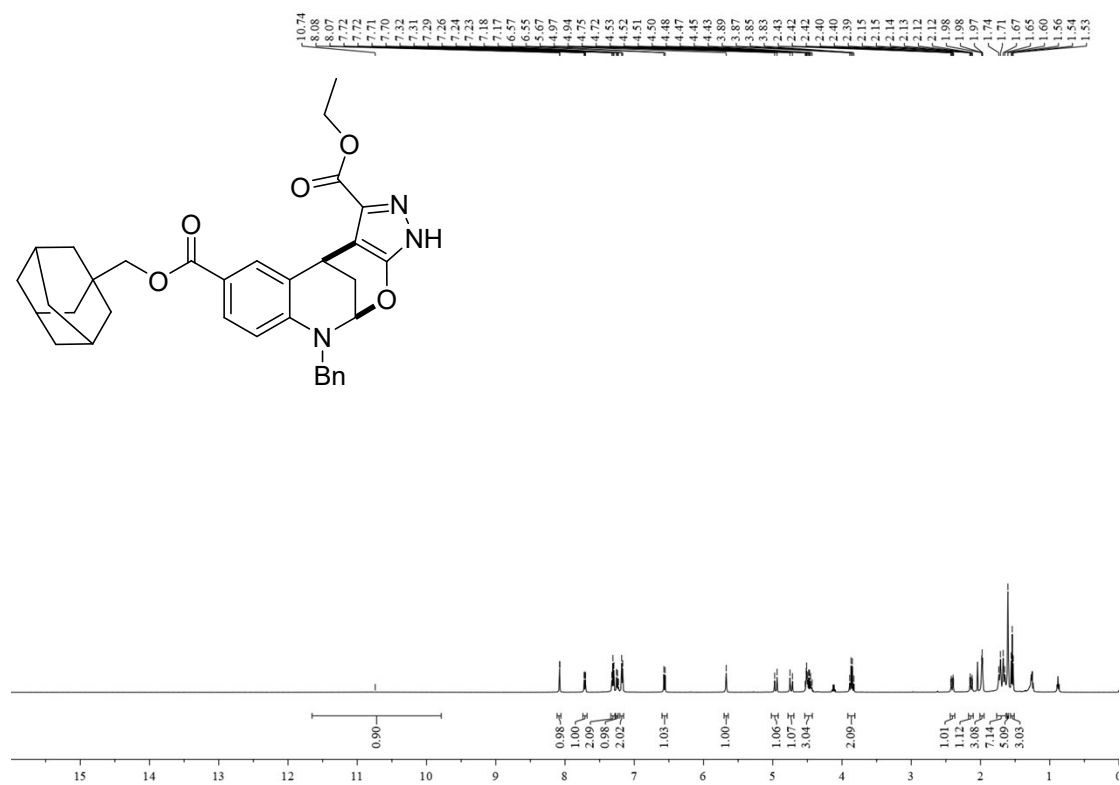

**<sup>13</sup>C-NMR spectrum of C<sub>33</sub>**

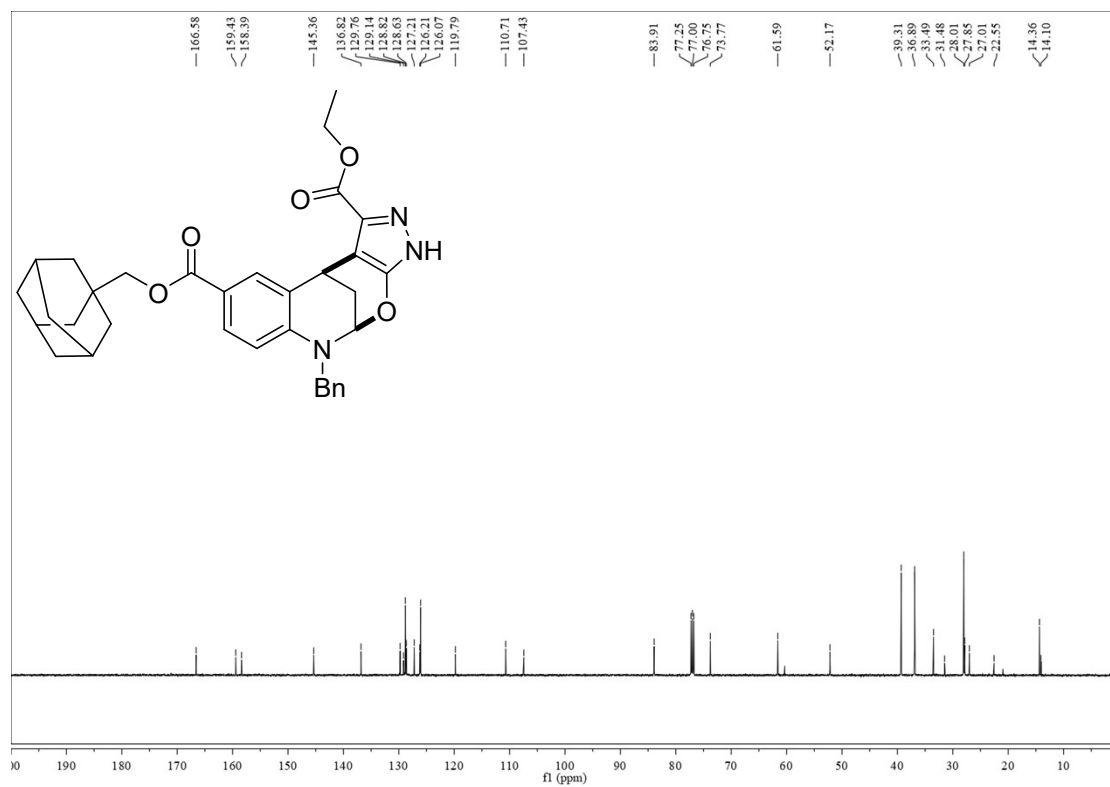

**<sup>1</sup>H-NMR spectrum of C<sub>34</sub>**

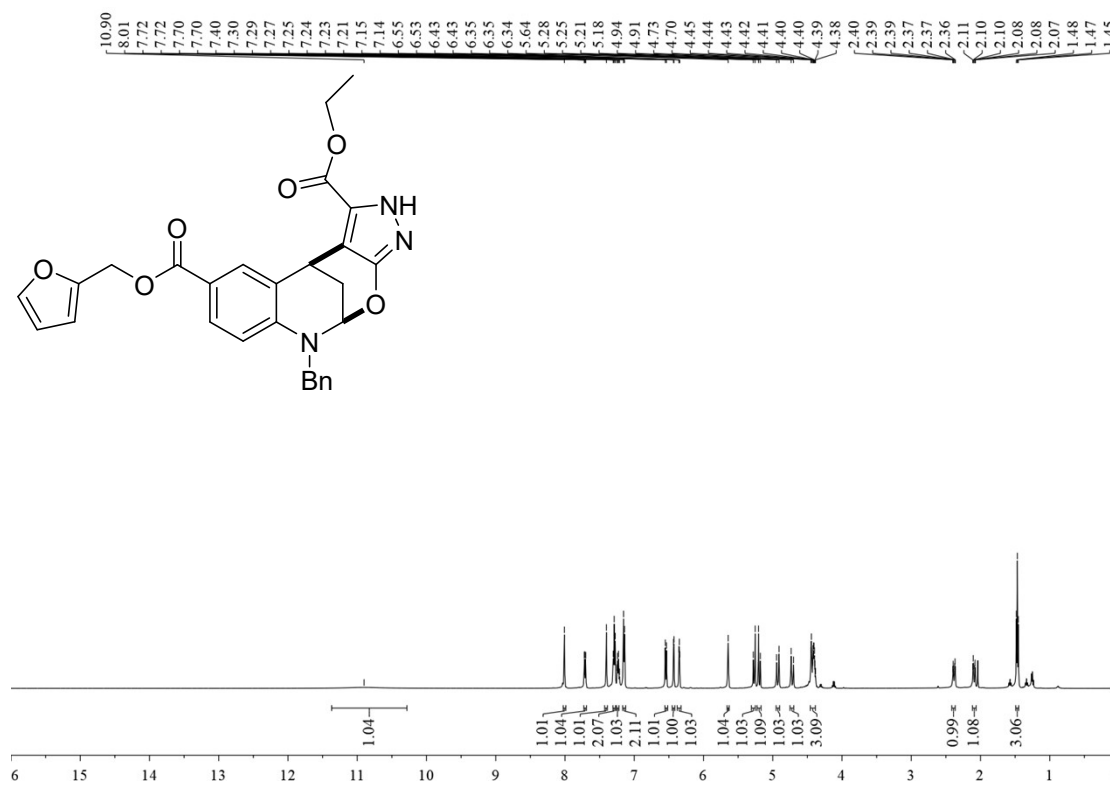

**<sup>13</sup>C-NMR spectrum of C<sub>34</sub>**

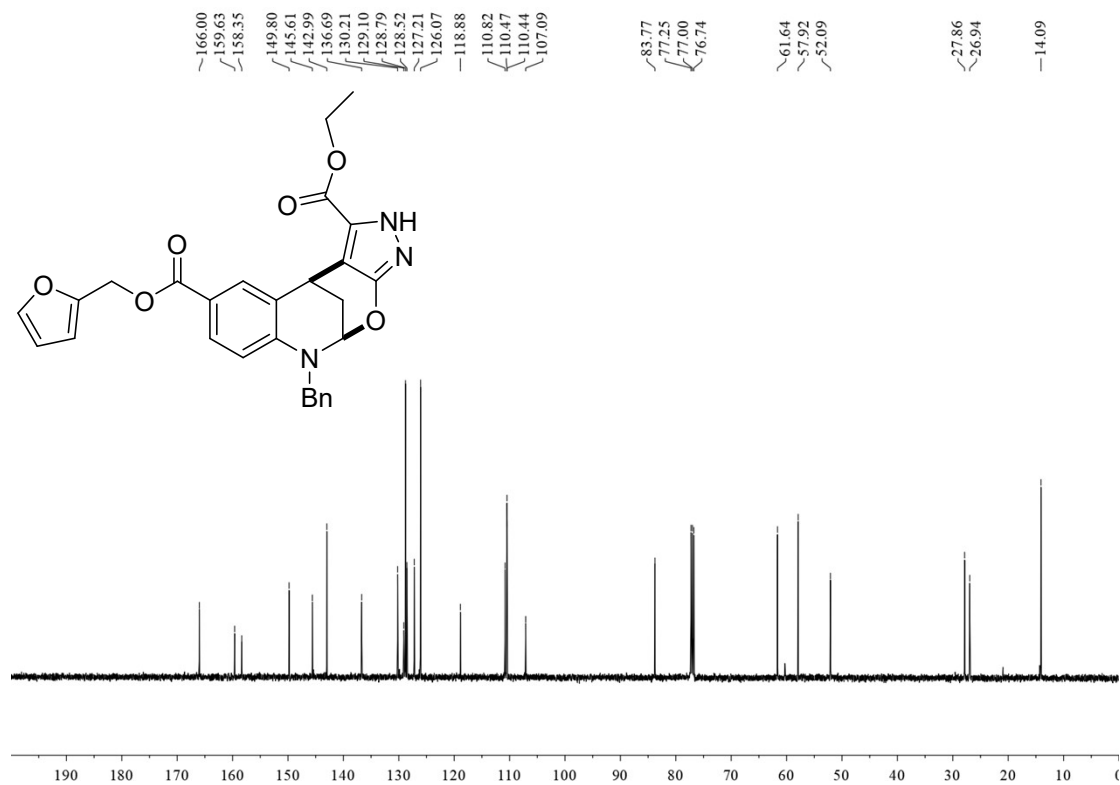

**<sup>1</sup>H-NMR spectrum of C<sub>35</sub>**

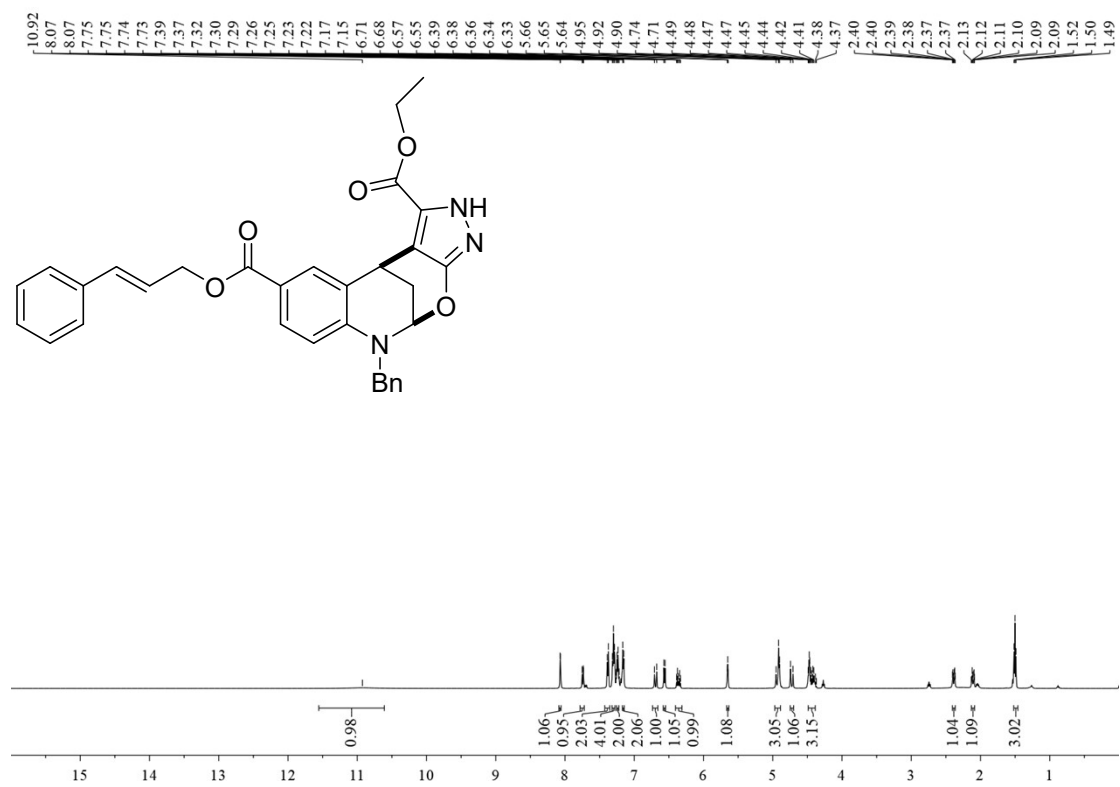



**<sup>13</sup>C-NMR spectrum of C<sub>36</sub>**

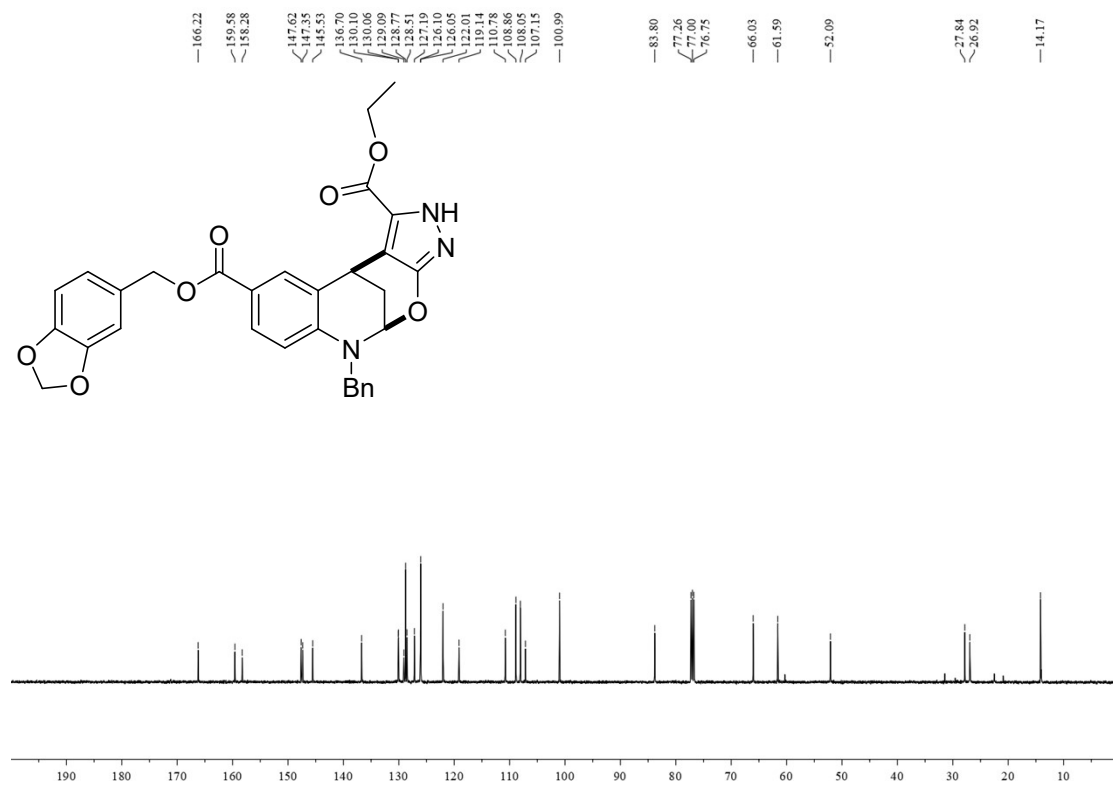

**<sup>1</sup>H-NMR spectrum of C<sub>37</sub>**

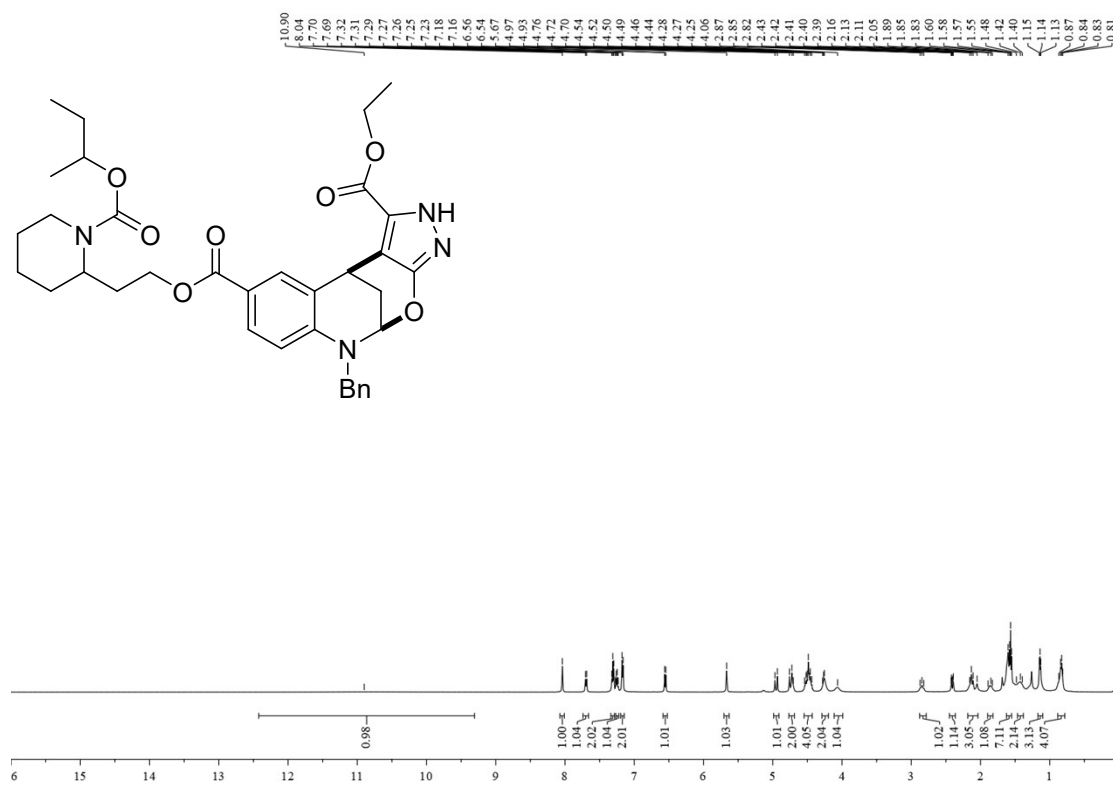

**<sup>13</sup>C-NMR spectrum of C<sub>37</sub>**

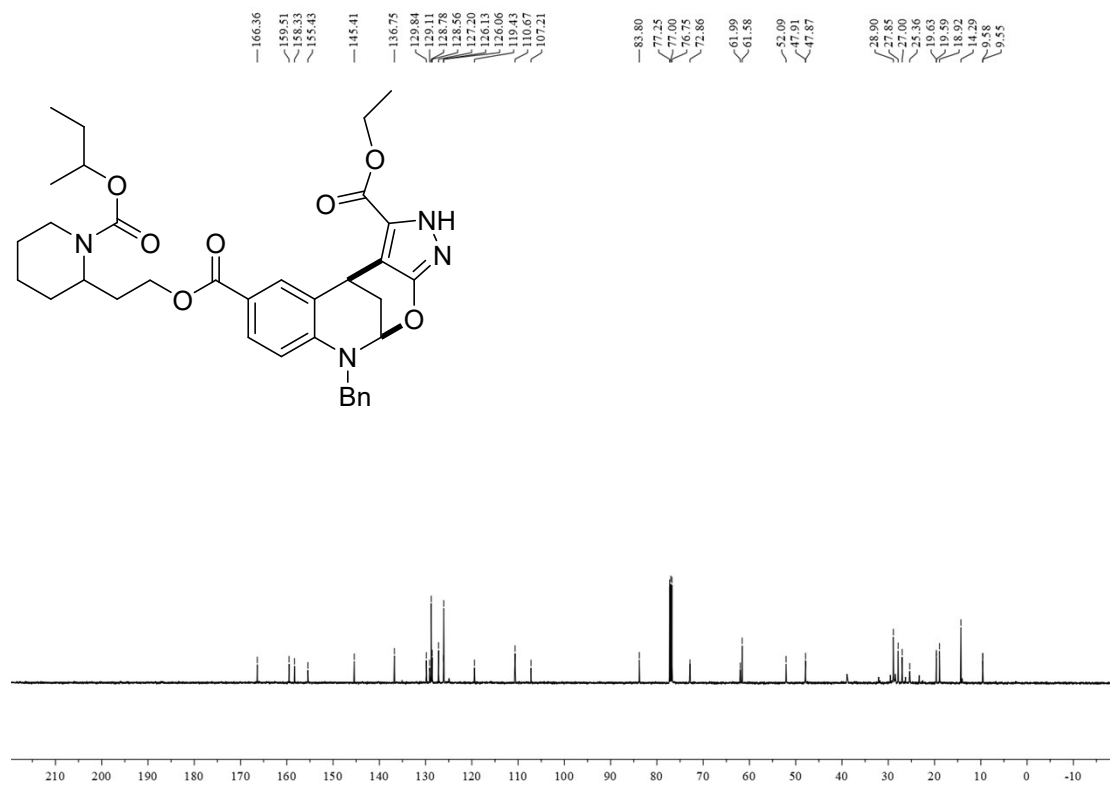

**<sup>1</sup>H-NMR spectrum of C<sub>38</sub>**

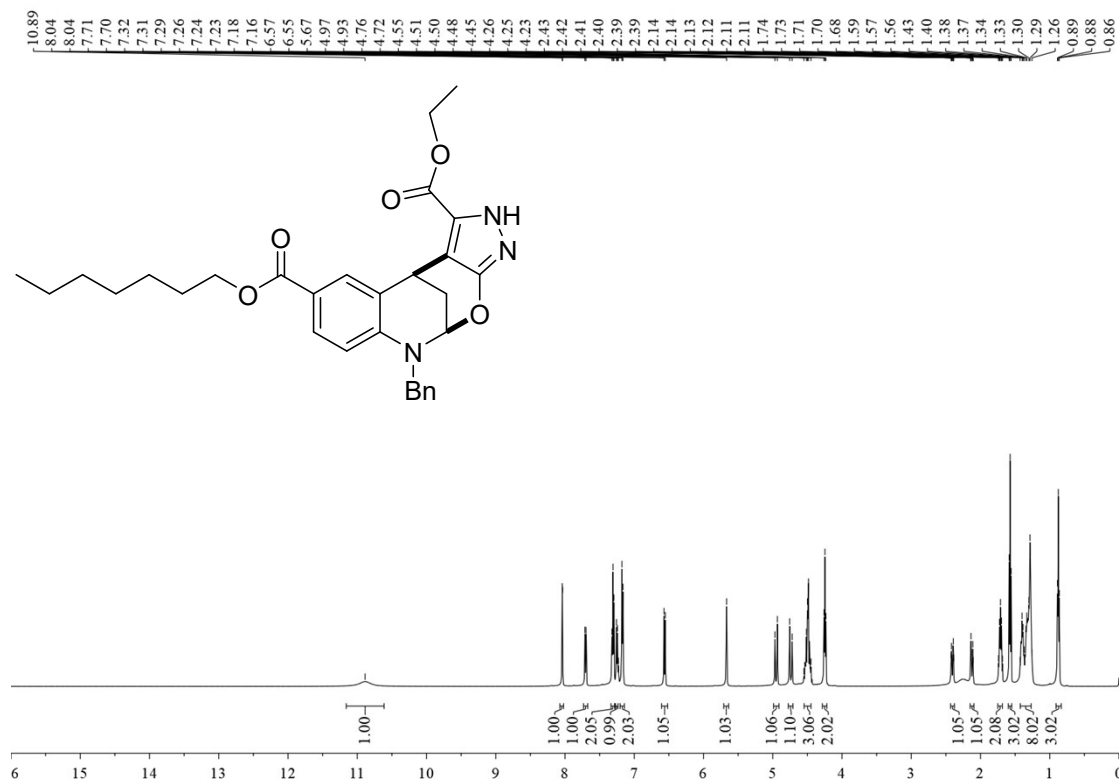

**<sup>13</sup>C-NMR spectrum of C<sub>38</sub>**

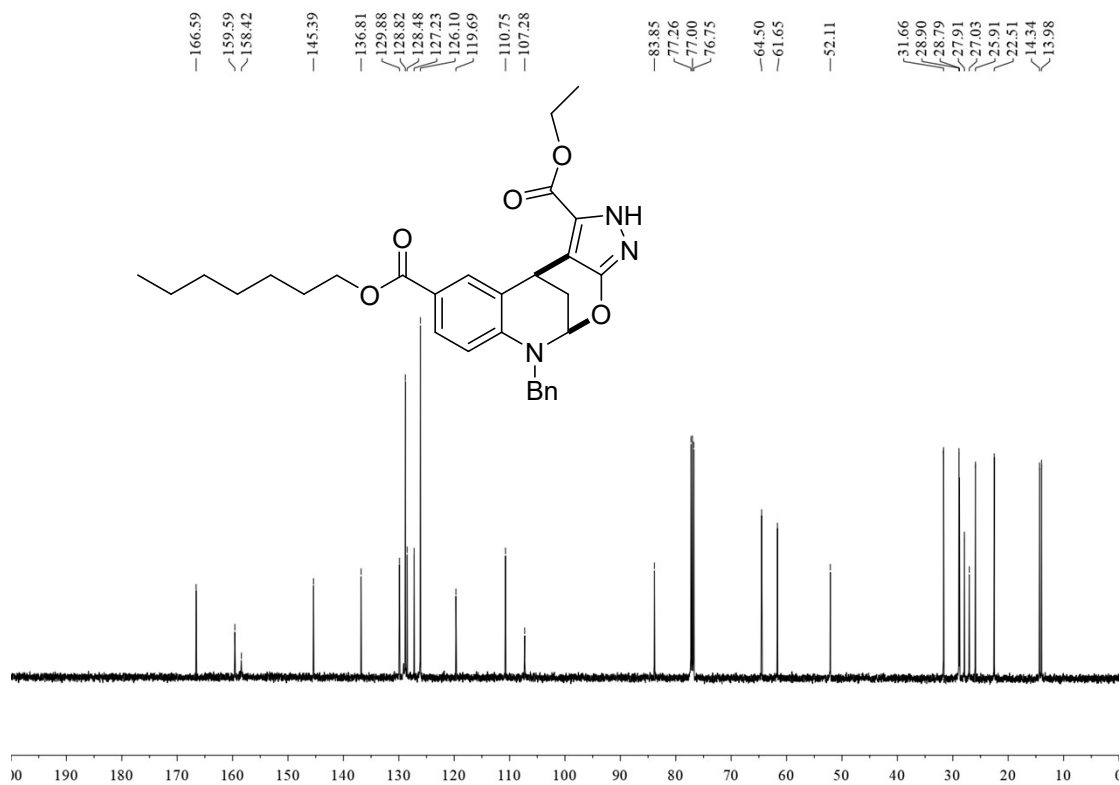

**<sup>1</sup>H-NMR spectrum of C<sub>39</sub>**

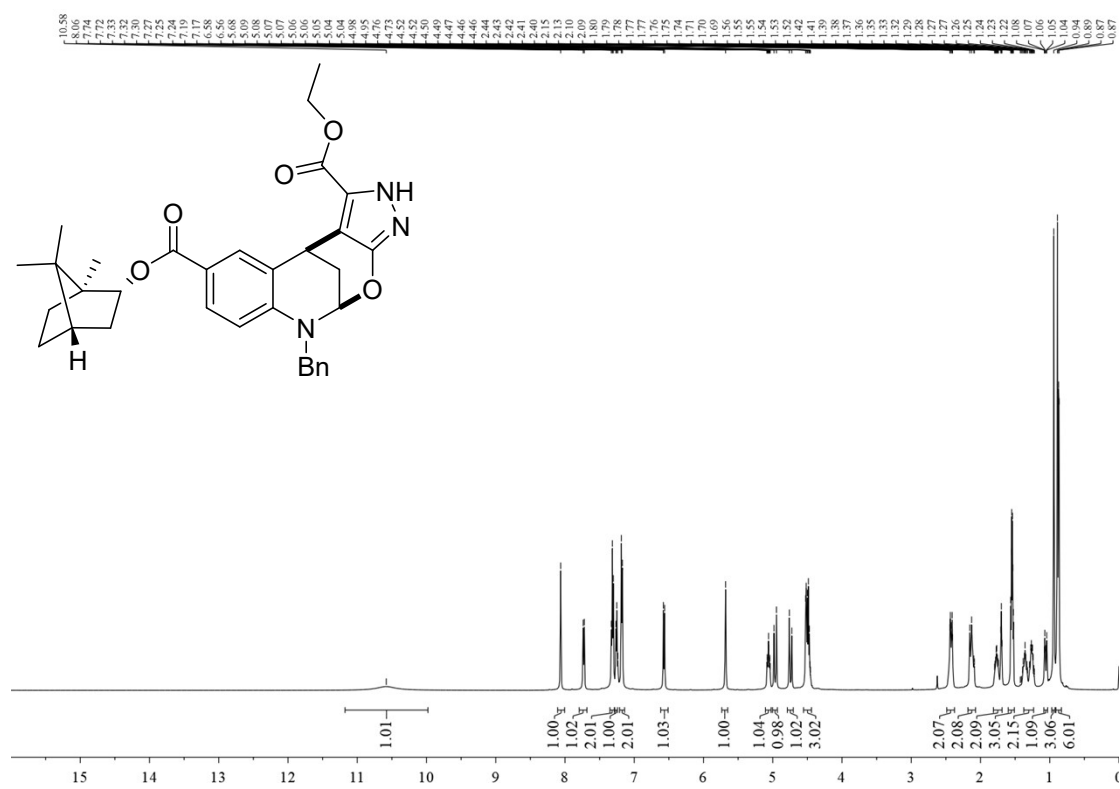



**<sup>13</sup>C-NMR spectrum of C<sub>39</sub>**

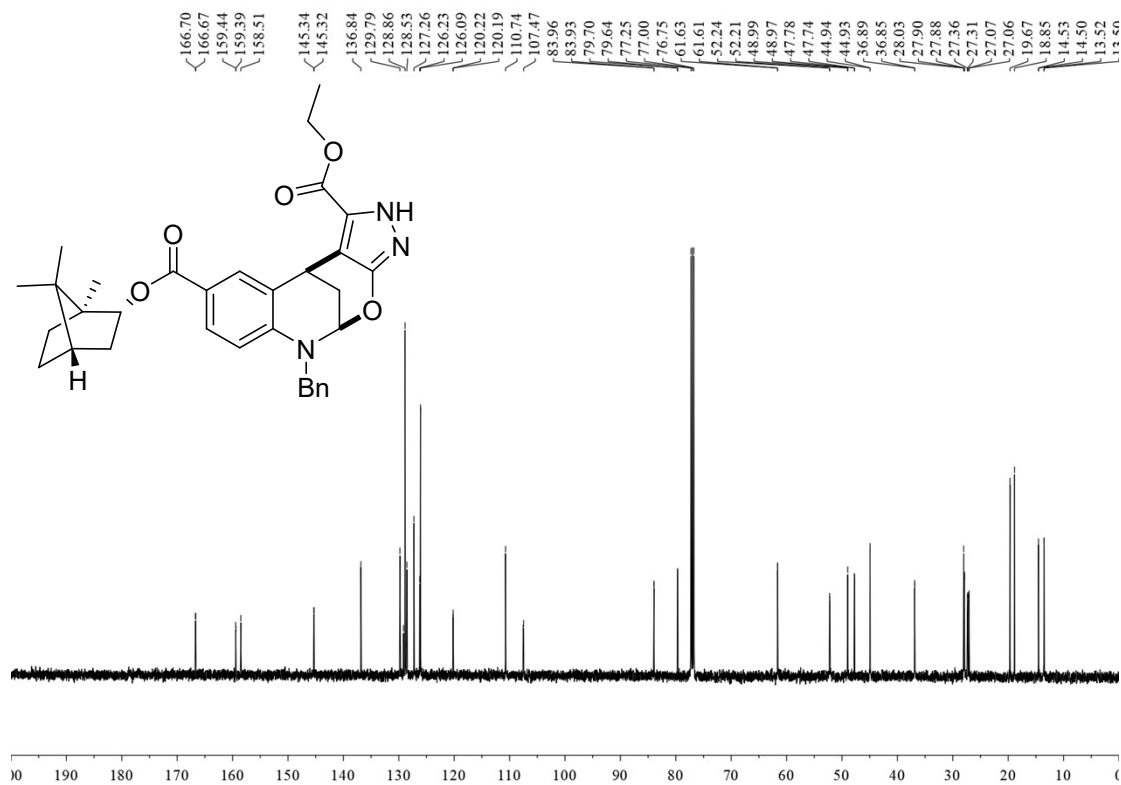

**<sup>1</sup>H-NMR spectrum of C<sub>40</sub>**

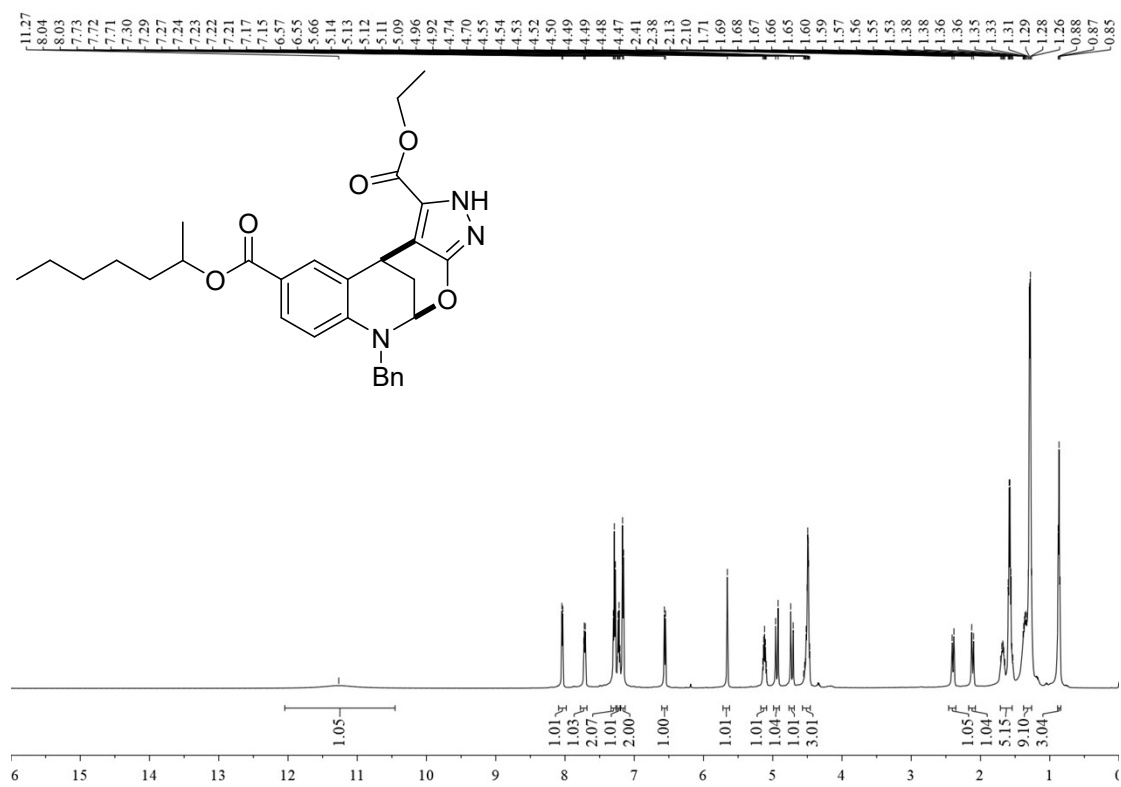

**<sup>13</sup>C-NMR spectrum of C<sub>40</sub>**

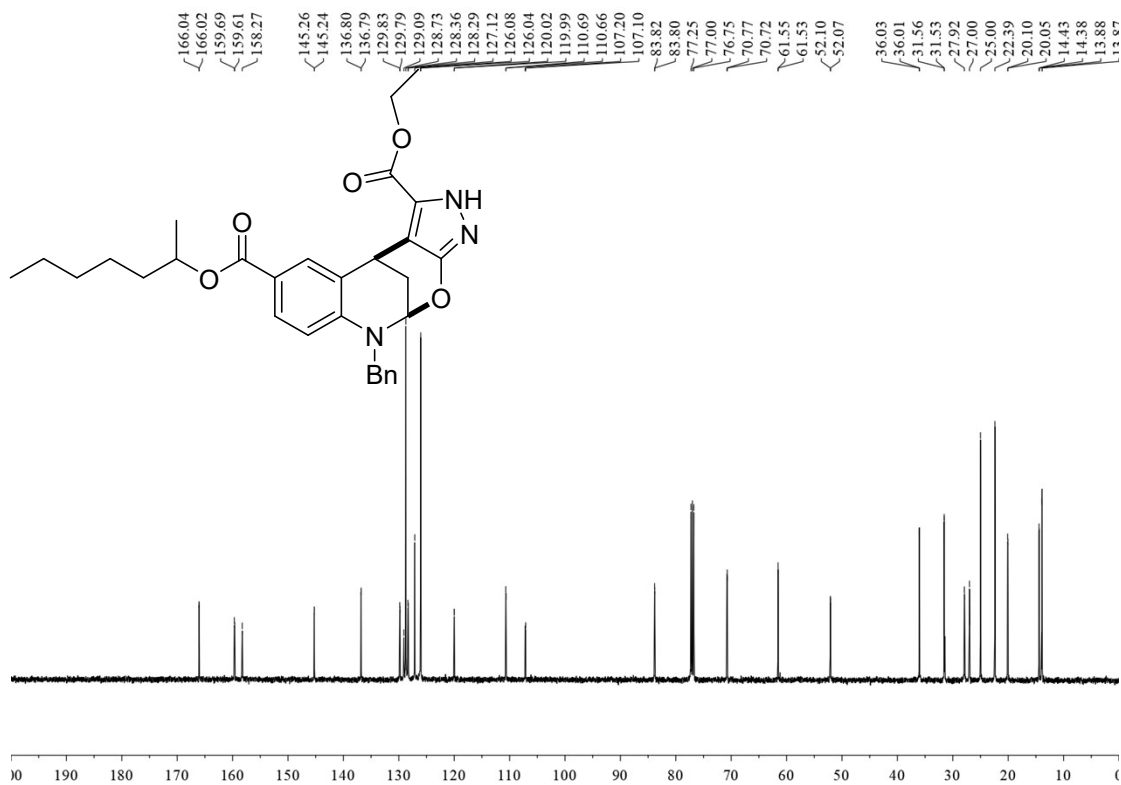

**<sup>1</sup>H-NMR spectrum of C<sub>41</sub>**

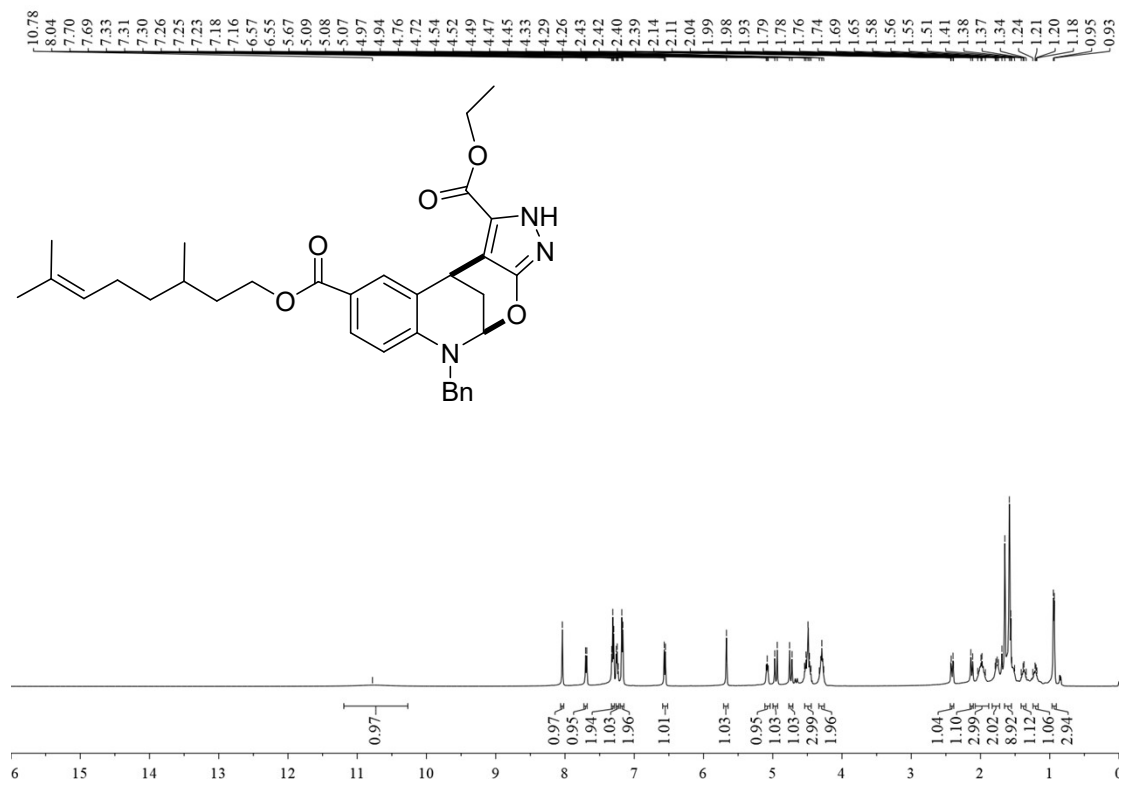



**<sup>13</sup>C-NMR spectrum of C<sub>42</sub>**

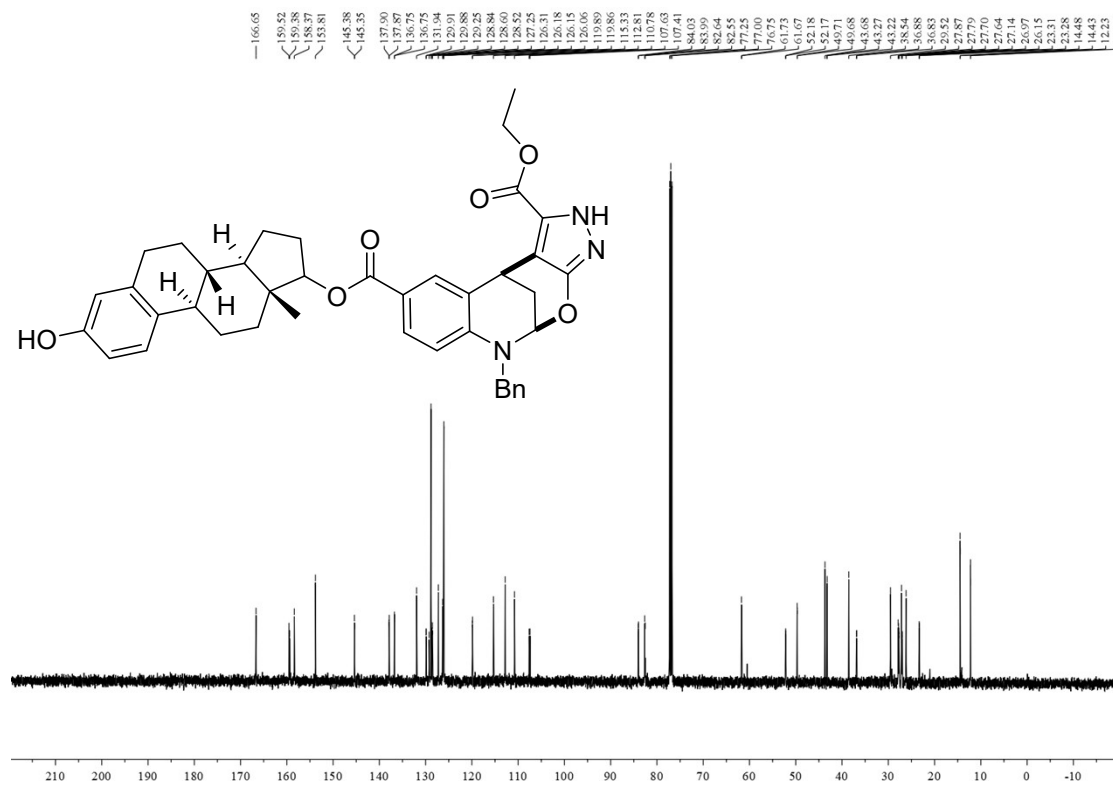

**<sup>1</sup>H-NMR spectrum of C<sub>43</sub>**

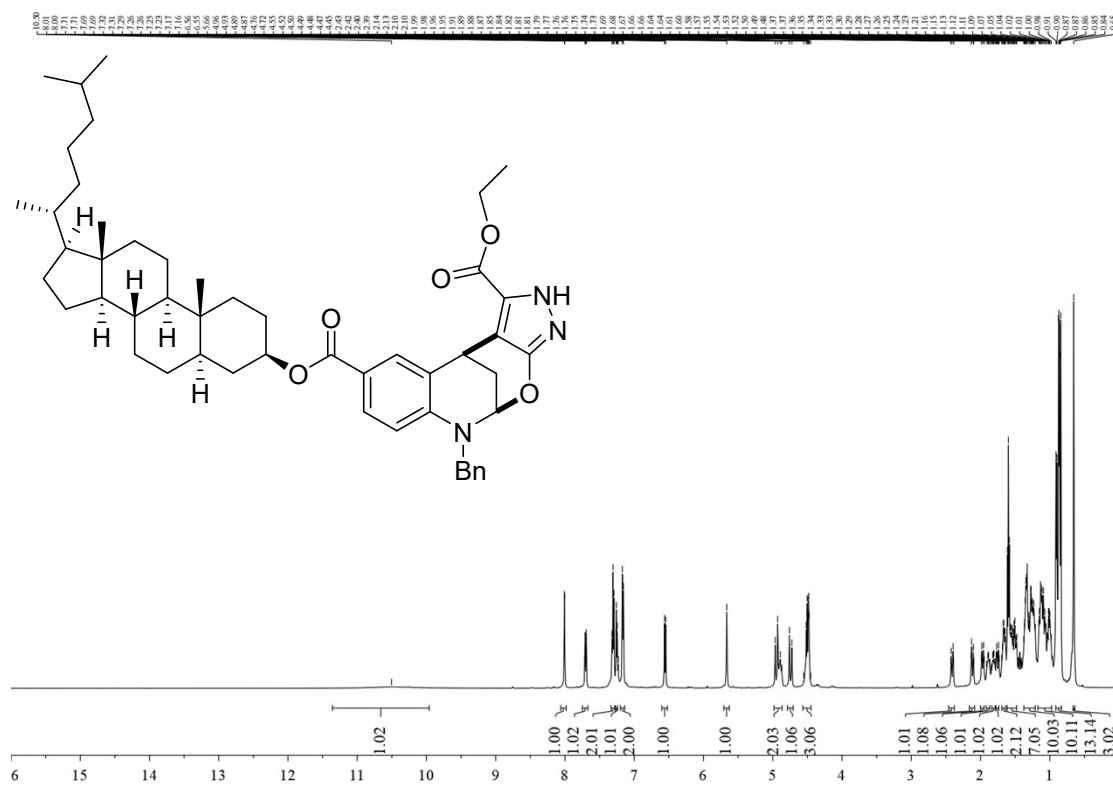

**<sup>13</sup>C-NMR spectrum of C<sub>43</sub>**

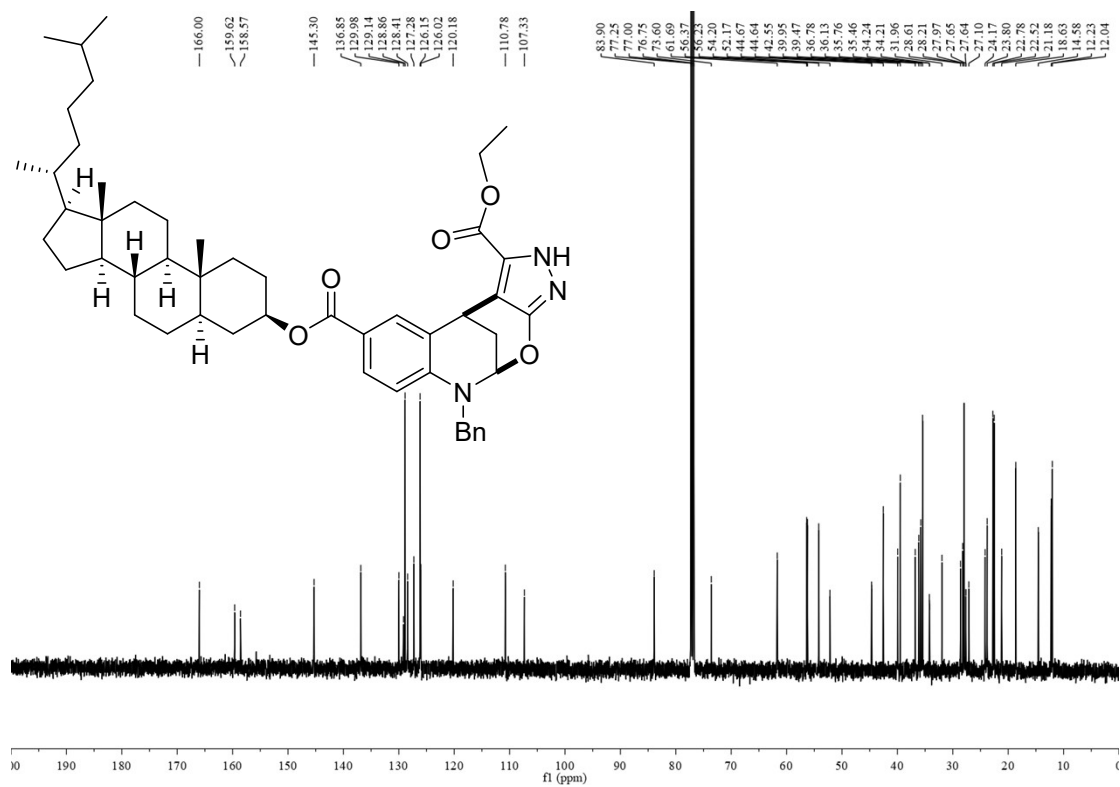

**<sup>1</sup>H-NMR spectrum of C<sub>44</sub>**

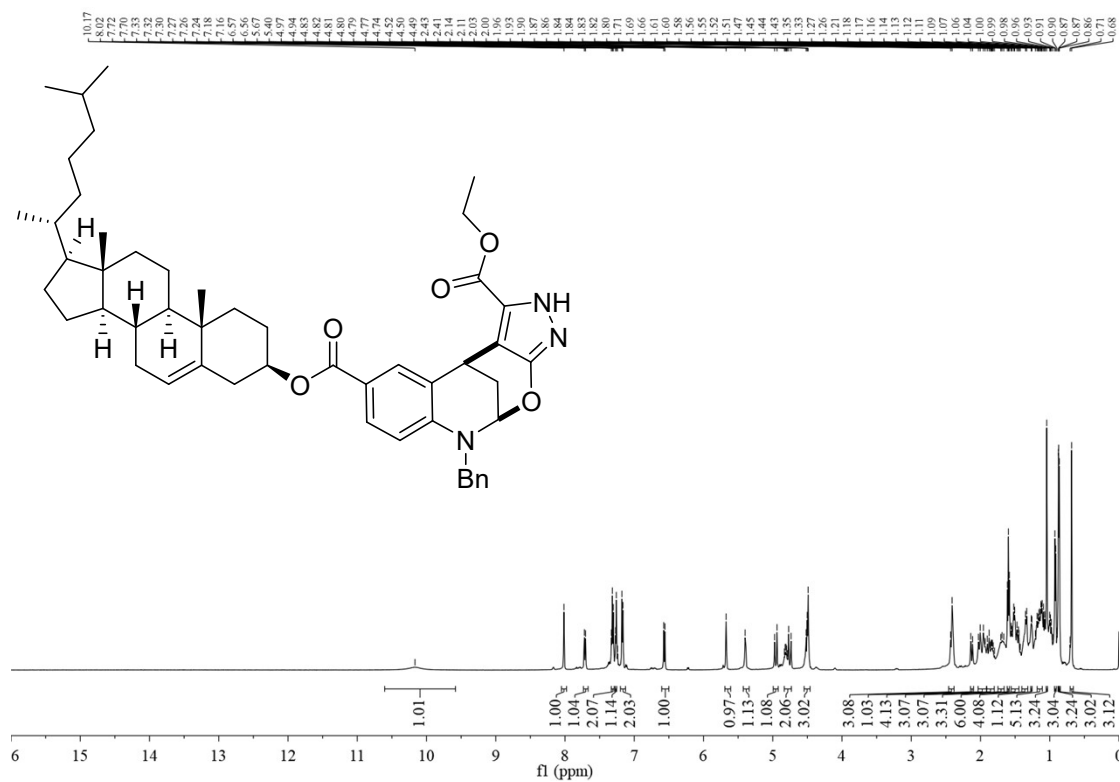

**<sup>13</sup>C-NMR spectrum of C<sub>44</sub>**

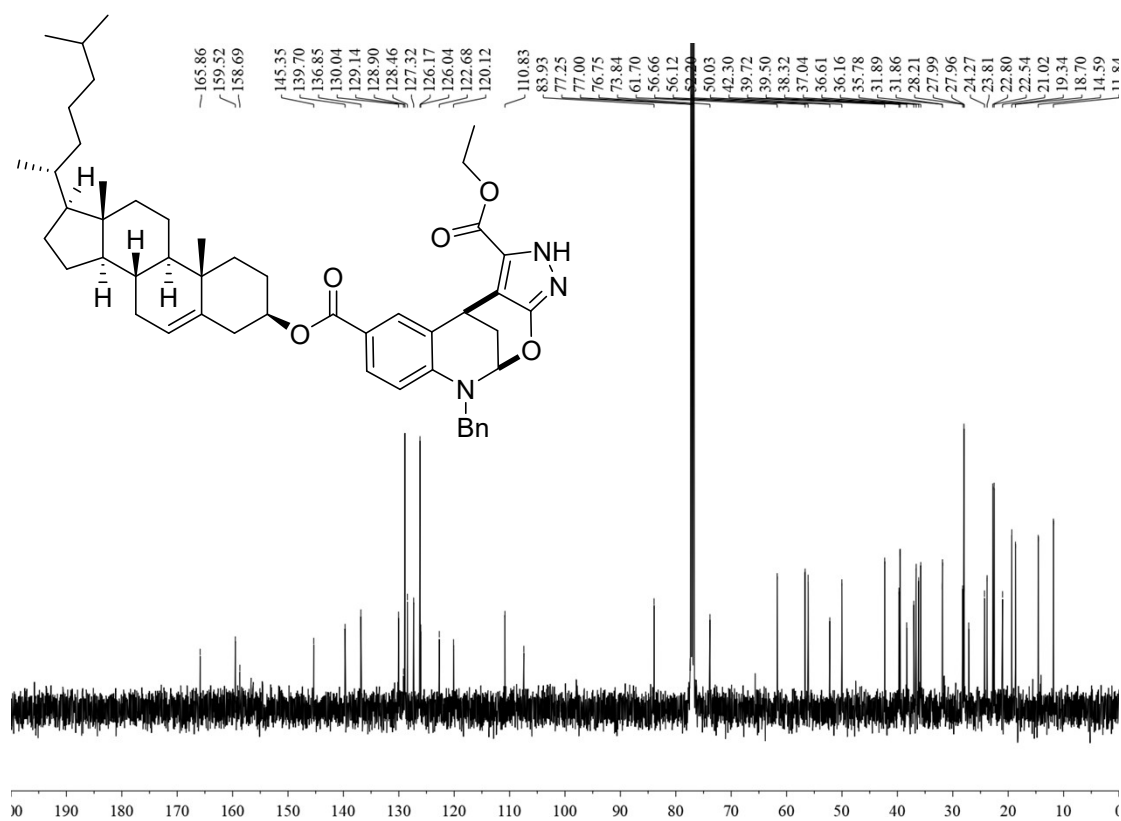

**<sup>1</sup>H-NMR spectrum of int-2**

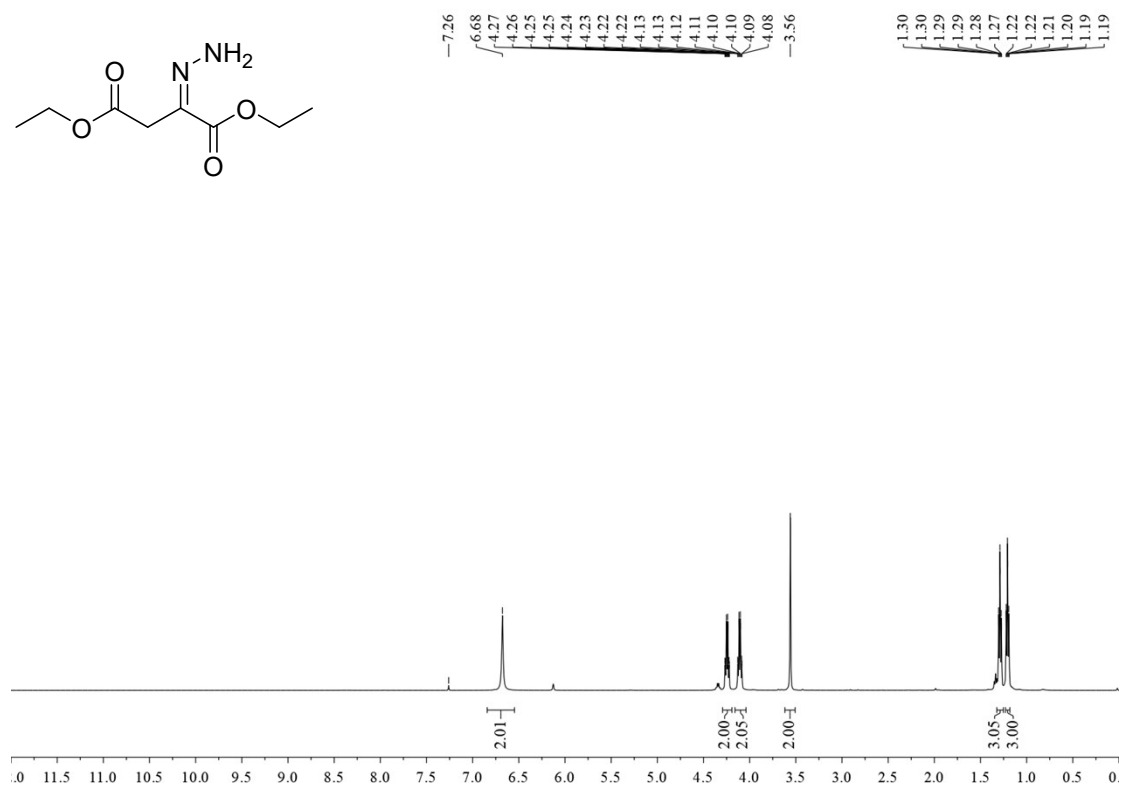

### <sup>13</sup>C-NMR spectrum of int-2

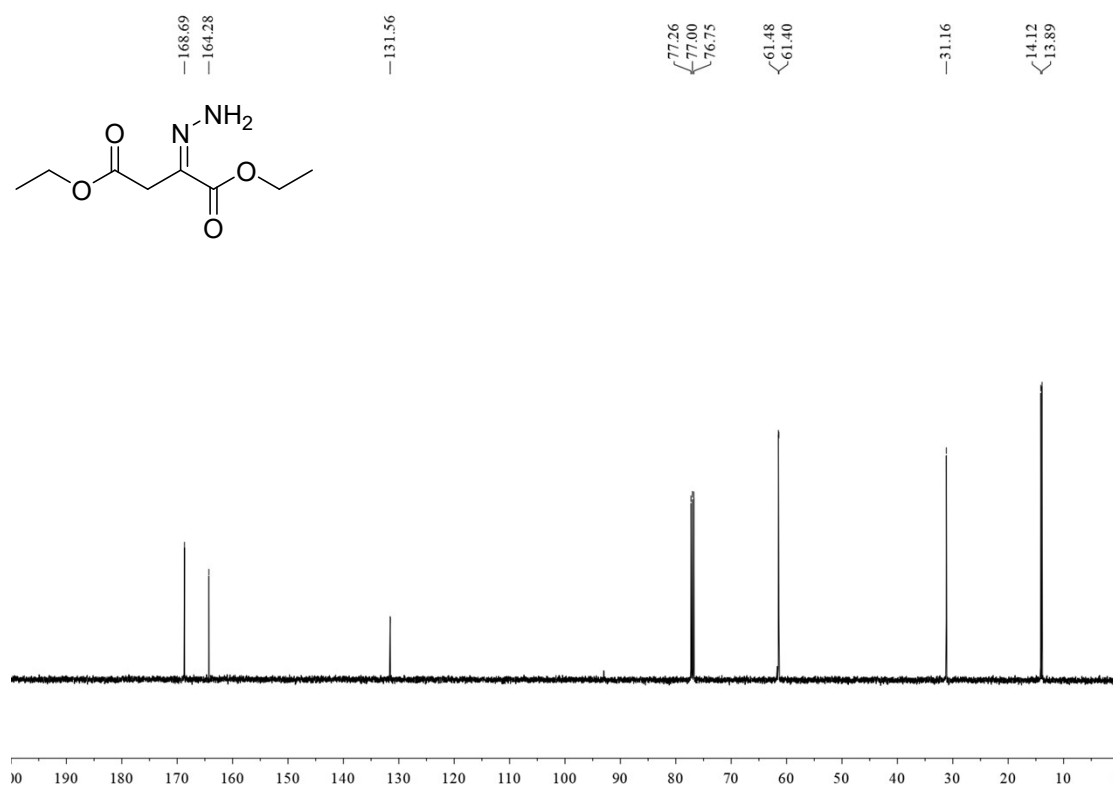

### <sup>1</sup>H-NMR spectrum of int-3

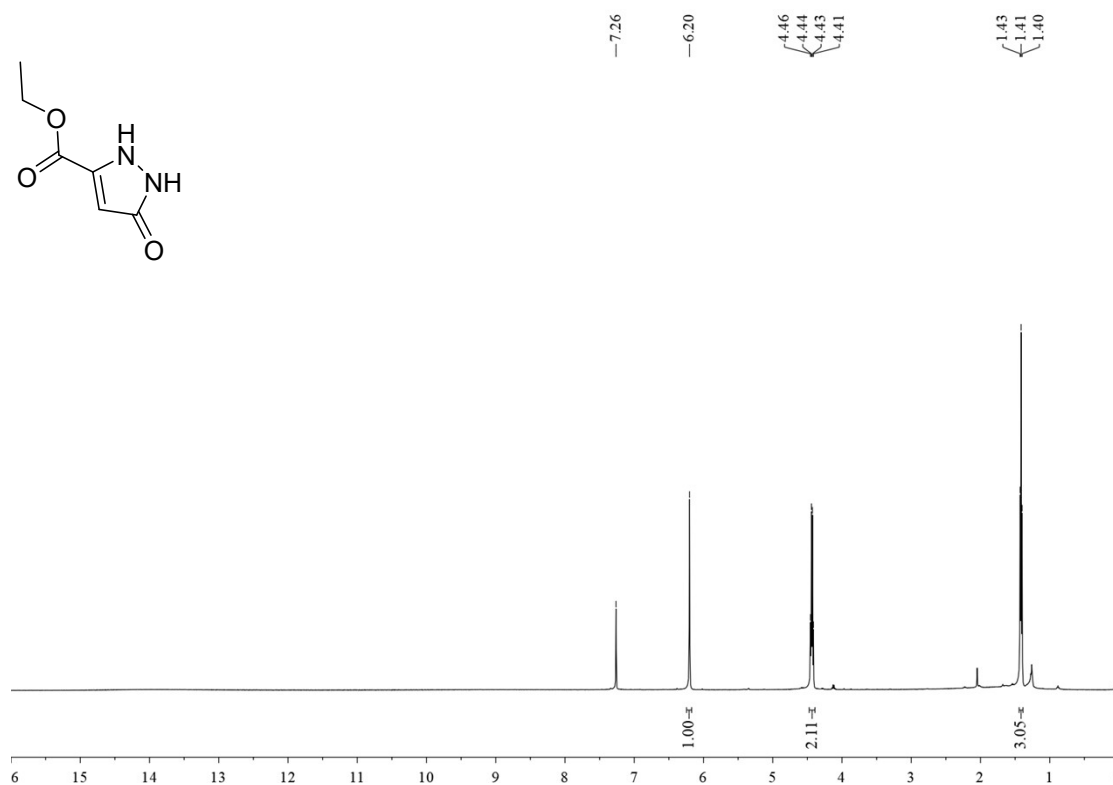

# <sup>13</sup>C-NMR spectrum of int-3

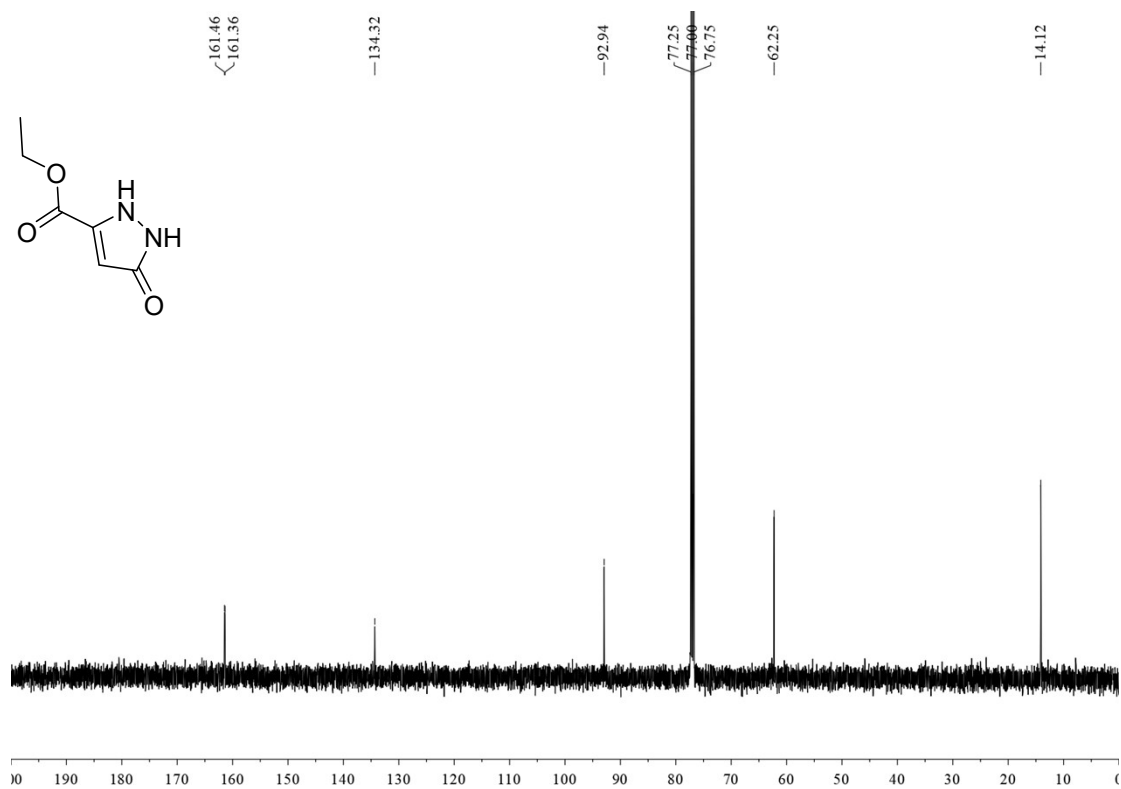

Supplement: d3ob01013a1.pdf [file d3ob01013a1.pdf]
